# Supplementary material for: Scoping review on interventions to improve adherence to reporting guidelines in health research
Source: PubMed Central journal article supplement (PMC6527996; doi:10.1136/bmjopen-2018-026589), 2019-05-09
Supplement: bmjopen-2018-026589.draft_revisions.pdf [file bmjopen-2018-026589.draft_revisions.pdf]

# BMJ Open

BMJ Open is committed to open peer review. As part of this commitment we make the peer review history of every article we publish publicly available.

When an article is published we post the peer reviewers' comments and the authors' responses online. We also post the versions of the paper that were used during peer review. These are the versions that the peer review comments apply to.

The versions of the paper that follow are the versions that were submitted during the peer review process. They are not the versions of record or the final published versions. They should not be cited or distributed as the published version of this manuscript.

BMJ Open is an open access journal and the full, final, typeset and author-corrected version of record of the manuscript is available on our site with no access controls, subscription charges or pay-per-view fees (<http://bmjopen.bmj.com>).

If you have any questions on BMJ Open's open peer review process please email [info.bmjopen@bmj.com](mailto:info.bmjopen@bmj.com)

# BMJ Open

## A scoping review on interventions to improve adherence to reporting guidelines in health research

|                               |                                                                                                                                                                                                                                                                                                                                                                                                                                                             |
|-------------------------------|-------------------------------------------------------------------------------------------------------------------------------------------------------------------------------------------------------------------------------------------------------------------------------------------------------------------------------------------------------------------------------------------------------------------------------------------------------------|
| Journal:                      | <i>BMJ Open</i>                                                                                                                                                                                                                                                                                                                                                                                                                                             |
| Manuscript ID                 | bmjopen-2018-026589                                                                                                                                                                                                                                                                                                                                                                                                                                         |
| Article Type:                 | Research                                                                                                                                                                                                                                                                                                                                                                                                                                                    |
| Date Submitted by the Author: | 12-Sep-2018                                                                                                                                                                                                                                                                                                                                                                                                                                                 |
| Complete List of Authors:     | Blanco, David; Universitat Politècnica de Catalunya, Statistics and Operations Research<br>Altman, Doug; Centre for Statistics in Medicine<br>Moher, David; Ottawa Hospital Research Institute, Centre for Journalology<br>Boutron, Isabelle; Université Paris Descartes, Centre d'épidémiologie clinique<br>Kirkham, Jamie; University of Liverpool, Biostatistics<br>Cobo, Erik; Universitat Politècnica de Catalunya, Statistics and Operations Research |
| Keywords:                     | Scoping review, Quality of reporting, Completeness of reporting, Reporting guidelines, Knowledge synthesis, Adherence                                                                                                                                                                                                                                                                                                                                       |
|                               |                                                                                                                                                                                                                                                                                                                                                                                                                                                             |

SCHOLARONE™  
Manuscripts

# A scoping review on interventions to improve adherence to reporting guidelines in health research

## Authors

David Blanco<sup>1,2</sup>, Doug Altman<sup>3</sup>, David Moher<sup>4</sup>, Isabelle Boutron<sup>5</sup>, Jamie J Kirkham<sup>6\*</sup> and Erik Cobo<sup>1\*</sup>.

\*JJK and EC are joint senior authors.

<sup>1</sup>Statistics and Operations Research Department, Universitat Politècnica de Catalunya - Barcelona Tech, Barcelona, Spain.

<sup>2</sup>INSERM, U1153 Epidemiology and Biostatistics Sorbonne Paris Cité Research Center (CRESS), Methods of Therapeutic Evaluation of Chronic Diseases (METHODS) Team, Paris Descartes University, Sorbonne Paris Cité, Paris F-75014, France.

<sup>3</sup>Centre for Statistics in Medicine, University of Oxford, Oxford, UK.

<sup>4</sup>Centre for Journalology, Ottawa Hospital Research Institute, Ottawa, Canada.

<sup>5</sup>Centre d'Epidémiologie Clinique, Université Paris Descartes, Paris, France.

<sup>6</sup>Department of Biostatistics, University of Liverpool, Liverpool, UK.

Correspondence to David Blanco; [david.blanco.tena@upc.edu](mailto:david.blanco.tena@upc.edu)

## Keywords

Scoping review, knowledge synthesis, reporting guidelines, completeness of reporting, quality of reporting, adherence

## Abstract

**Objectives:** The goal of this study is to identify, analyse and classify interventions to improve adherence to reporting guidelines in order to obtain a wide picture of how the

1  
2  
3 problem of enhancing the completeness of reporting of biomedical literature has been  
4 tackled so far.  
5

6  
7 **Design:** Scoping review.  
8

9  
10 **Search strategy:** We searched the MEDLINE, EMBASE, and Cochrane Library databases  
11 and conducted a grey literature search for (i) studies evaluating interventions to  
12 improve adherence to reporting guidelines in health research and (ii) other types of  
13 references describing interventions that have been performed or suggested but never  
14 evaluated. The characteristics and effect of the evaluated interventions were analysed.  
15 Moreover, we explored the rationale of the interventions identified and determined  
16 the existing gaps in research on the evaluation of interventions to improve adherence  
17 to reporting guidelines.  
18  
19

20  
21 **Results:** 109 references containing 31 interventions (11 evaluated) were included.  
22 These were grouped into five categories: (1) training, (2) improved understanding, (3)  
23 encouraging adherence, (4) monitoring adherence and providing feedback, and (5)  
24 collaboration among authors and experts. Only 4 of the interventions found had been  
25 evaluated by randomised trials. Research gaps identified included the evaluation of  
26 interventions (i) on training and improved understanding of reporting guidelines, (ii) at  
27 early stages of research, and (iii) after the process of author revision of the manuscript.  
28  
29

30  
31 **Conclusions:** This scoping review identifies a wide range of strategies to improve  
32 adherence to reporting guidelines that can be taken by different stakeholders. Future  
33 randomised trials should evaluate further interventions and address the research gaps  
34 identified. This review is part of a larger project whose next goals are (i) to capture  
35 editors' perceptions on the barriers and facilitators of some interventions identified in  
36 this review, (ii) to explore new interventions, and (iii) to evaluate one of these  
37 interventions in collaboration with BMJ Open.  
38  
39

## 40 41 42 43 44 45 46 47 48 49 50 51 **Strengths and limitations**

- 52  
53  
54 • We considered wide range of reporting guidelines as well as their extensions.  
55  
56  
57  
58  
59  
60

- Merging the evidence found in the published and grey literature allows us to provide a broad picture of how the problem of enhancing adherence to reporting guidelines has been tackled so far and could be faced in the future.
- The screening and data extraction were performed in duplicate.
- We could have missed evidence of possible interventions that may not be present in the published or grey literature but are instead used in practice and continue to be used.

## Background

Approximately 85% of all biomedical research today is estimated to be wasted, due, in part, to incomplete or inaccurate reporting (1). The past two decades have given rise to a number of changes in an effort to help authors and the broader scientific community properly report research methods and findings, which would allow them to contribute to the broader goal of combating waste in biomedical research. The most prominent of these changes has been the inception of reporting guidelines for different study types, data, and clinical areas (2).

The vast majority of reporting guidelines have not yet been assessed as to whether they help improve the reporting of research (3), but some, such as the Consolidated Standards of Reporting Trials (CONSORT) for the reporting of randomised controlled trials (RCTs) (4), have been shown to enhance the completeness of reporting (5,6).

Dozens of systematic reviews have explored the extent of adherence to some reporting guidelines in certain areas of health research (7–10). Saaman et al. (11) went one step further and performed a systematic review of systematic reviews assessing adherence to reporting guidelines. As they considered a broad range of clinical areas and study designs, their results provided a global picture of adherence to reporting guidelines in health research. Although some studies reported acceptable overall levels of completeness of reporting and found that it had improved since the introduction of certain reporting guidelines such as CONSORT, the authors of most of the reviews (43 of 50, 86%) concluded that more improvement is needed or that adherence to reporting guidelines was inadequate, poor, medium or suboptimal. Therefore, it is

1  
2  
3 warranted to explore and develop strategies to improve the current levels of  
4 adherence to reporting guidelines.  
5  
6

7 In recent years, several initiatives aiming to improve adherence to reporting guidelines  
8 have been proposed, some of which have already been evaluated. For example, the  
9 effect of journal endorsement of reporting guidelines (3,5,6) and the implementation  
10 of writing aid tools for authors such as the CONSORT-based web tool (COBWEB) (12)  
11 have been assessed. While some of these strategies have not been shown to have a  
12 benefit (3), others report better but still suboptimal levels of reporting (5,6) or even  
13 clear benefits (12,13).  
14  
15  
16  
17  
18

19 As mentioned, several reviews have analysed the quality of reporting in different  
20 clinical areas and for different study types (7–10). However, no scoping review has  
21 been performed that provides a global picture of different strategies aiming to  
22 improve adherence to reporting guidelines. Given the low levels of completeness of  
23 reporting in health research that have been observed (11), along with the imperative  
24 need to take further actions for mitigating this problem, we considered that  
25 performing such a scoping review was warranted.  
26  
27  
28  
29  
30  
31  
32

33 In addition to analysing the implementation and effect of interventions that have  
34 already been evaluated, we aimed to gather other possible strategies that could be  
35 implemented and evaluated in the future.  
36  
37  
38

39 For clarification, some relevant terms used throughout the scoping are defined in Box  
40 1, which is based on Stevens et al. (3).  
41  
42

43 **Box 1:** relevant definitions in the context of this scoping review  
44  
45  
46  
47  
48  
49  
50  
51  
52  
53  
54  
55  
56  
57  
58  
59  
60

**Adherence:** Action(s) taken by authors to ensure that a research report is compliant with the items recommended by the appropriate/relevant reporting guideline.

**Endorsement:** Action(s) taken by journals to indicate their support for the use of one or more reporting guideline(s) by authors submitting research reports for consideration.

**Implementation:** Action(s) taken by journals to ensure that authors adhere to an endorsed reporting guideline and that therefore published papers are completely reported.

**Complete reporting:** Pertains to the state of reporting of a study report and whether it is compliant with all the items recommended by the appropriate/relevant reporting guideline.

## Methods

As presented in the published protocol (14), this scoping review follows the methodology manual published by the Joanna Briggs Institute for scoping reviews (15).

## Objectives

The scoping review questions are:

1. What interventions to improve adherence to reporting guidelines in health research have been evaluated?
2. What further interventions to improve adherence to reporting guidelines have been performed or suggested but never evaluated?

We aim to analyse and classify the interventions found for both questions in order to obtain a wide picture of how the problem of adhering better to reporting guidelines has been tackled so far and can be tackled in the future.

## Eligibility criteria

We included:

1. Studies evaluating interventions aiming to improve adherence to reporting guidelines in health research, irrespective of study design.

2. Commentaries, editorials, letters, studies, and online sources describing possible interventions to improve adherence to reporting guidelines that have been performed or suggested but never evaluated.

The reporting guidelines considered were those shown on 8 May 2017 on the EQUATOR (Enhancing the QUALity and Transparency Of Health Research) Network website (16) as “Reporting Guidelines for main study types” (see Supplementary file 1). In addition, we also included QUOROM (Quality of Reporting of Meta-analyses), since it was the precursor of PRISMA.

We considered the following languages: English, Spanish, French, German and Catalan.

### **Exclusion criteria**

We have excluded references that include interventions that do not specifically aim to improve the completeness of reporting, even though these interventions may actually influence completeness. For example, we have excluded clinical trial registration even though it may enhance completeness of reporting, because its main goals are to improve clinical trial transparency while also reducing publication and selective reporting biases.

### **Search strategy and study selection**

On 8 May 2017, we searched PubMed, EMBASE, and Cochrane Library databases for articles published between 1 January 1996 and 31 March 2017, in accordance with our scheduled search (14). The detailed search terms for PubMed can be found in Supplementary file 2.

The retrieved studies were exported into Mendeley and duplicates were removed. One reviewer (DB) first screened the titles and abstracts for eligibility. Each of the other two reviewers (JJK and EC) was randomly assigned 50% of the references and screened the titles and abstracts independently of the first reviewer. The reviewers classified the references into one of the following groups:



- 1  
2  
3 A) Evaluated: Includes references describing interventions to improve adherence  
4 to reporting guidelines that have been empirically assessed.  
5  
6 B) Non-evaluated: Includes references describing interventions to improve  
7 adherence to reporting guidelines that have been performed or suggested but  
8 never evaluated.  
9  
10  
11 C) Unclear: Includes references (i) containing vague statements such as “Authors,  
12 editors, and journals have to adhere better to reporting guidelines to improve  
13 the quality of reporting” or “greater efforts have to be made by authors to  
14 check that their research is compliant with [the relevant reporting guideline]”,  
15 or (ii) not having the abstract available.  
16  
17  
18 D) Excluded: Includes references (i) not describing interventions to improve  
19 adherence to any of the reporting guidelines considered and (ii) describing but  
20 not evaluating certain interventions that have already been classified as  
21 evaluated.  
22  
23  
24  
25  
26  
27

28 Disagreements were solved by discussion among the reviewers.  
29

30 Second, one reviewer (DB) examined the full-text of all group A and B references to  
31 confirm the previous classification, then all group C references to reclassify them  
32 either as group A, B, or D. Re-classification was verified by the initial reviewer (JJK or  
33 EC). Finally, one reviewer (DB) ensured literature saturation by searching the reference  
34 lists of included studies, the lists of articles citing them according to PubMed, and the  
35 individual studies included in two relevant systematic reviews (3,6).  
36  
37  
38  
39  
40

41 In addition, we performed a grey literature search, which included: the websites of  
42 networks and organizations promoting the use of reporting guidelines (i.e., EQUATOR  
43 Network and National Library of Medicine Research Reporting Guidelines and  
44 Initiatives); work groups of medical journal editors (i.e., International Committee of  
45 Medical Journal Editors (ICMJE) and World Association of Medical Editors (WAME));  
46 biomedical journal publishers (i.e., BMJ Publishing Group and BioMed Central); funding  
47 agencies (i.e., National Institute of Health (NIH) and European Research Council);  
48 online platforms of post-publication peer review (i.e., PubPeer and ScienceOpen); and  
49  
50  
51  
52  
53  
54  
55  
56  
57  
58  
59  
60

1  
2  
3 the abstract books of the past editions of the International Congress on Peer Review  
4 and Biomedical Publication.  
5

### 6 7 **Data extraction**

8  
9  
10 A data extraction form was developed to collect the information necessary for data  
11 synthesis. In order to better capture some further relevant aspects of the included  
12 references, the original data extraction form proposed in the protocol was updated.  
13  
14 Two reviewers (DB, JJK) independently performed a pilot data extraction on a random  
15 sample of 5 articles and subsequently refined the form.  
16  
17

18  
19 Extracted data included:  
20

- 21  
22 1. Publication characteristics: title, year of publication, author, author's affiliation  
23 country, and field of study.
- 24  
25 2. Characteristics of the intervention:
  - 26  
27 a. Classification as evaluated or non-evaluated.
  - 28  
29 b. Research stage: education, grant writing, protocol writing, manuscript  
30 writing, submission, journal peer review, author revision, copy-editing,  
31 and post-publication.
  - 32  
33 c. Rationale of the intervention, which refers to the deduced reasons why  
34 the intervention is evaluated or proposed.
  - 35  
36 d. For evaluated interventions: details of the intervention, study design  
37 (e.g. RCT, before-after, etc.), reporting guidelines considered and format  
38 (checklist, bullet points and/or examples), period of intervention,  
39 number of journals and articles involved, effect size of the intervention  
40 on adherence to reporting guidelines and measure used to assess this  
41 effect.  
42  
43
- 44  
45 3. Relevant conclusions.  
46  
47  
48  
49

50  
51 Two reviewers (DB, JJK) independently performed data extraction for all studies except  
52 for the individual studies of the two systematic reviews evaluating journal  
53 endorsement of reporting guidelines (3,6), since none of these studies described  
54  
55  
56  
57  
58  
59

1  
2  
3 further interventions and their results had already been reported in these reviews.  
4 Discrepancies between reviewers were discussed and solved by consensus.  
5  
6

### 7 **Data synthesis**

8  
9  
10 Following data extraction, interventions to improve adherence to reporting guidelines  
11 were categorised as follows:  
12  
13

- 14 1. Training: mentoring of different stakeholders on the practical use of reporting  
15 guidelines.
  - 16 2. Improved understanding: in-depth focus on the content and requirements of  
17 reporting guidelines.
  - 18 3. Encouraging adherence: suggestions and tools to facilitate compliance.
  - 19 4. Monitoring adherence and providing feedback: checking the level of  
20 compliance and indicating incorrect or missing items.
  - 21 5. Collaboration among authors and experts: interaction and cooperation on  
22 methodology and reporting.
- 23  
24  
25  
26  
27  
28  
29

30 One reviewer (DB) performed the initial categorization, which was verified and refined  
31 by the other two reviewers (JJK and EC).  
32  
33

34  
35 Furthermore, we determined the existing gaps in research on the evaluation of  
36 interventions to improve adherence to reporting guidelines. More specifically, we  
37 identified which categories of interventions and which research stages have not been  
38 addressed so far in studies evaluating interventions.  
39  
40  
41  
42

### 43 **Patients and public involvement**

44  
45 No patients or public were involved in the study.  
46  
47

### 48 **Results**

49  
50  
51 The database search yielded 1399 citations after deduplication (see Figure 1).  
52 Screening of titles and abstracts resulted in a first classification, after which 435 papers  
53 were included for full text review. We also reviewed the full text of 24 additional  
54 references found through forward citation searching. Furthermore, a grey literature  
55  
56  
57  
58  
59  
60

1  
2  
3 search yielded 7 additional references. Finally, 109 references were included. 90 of  
4 them (86 observational and 4 randomised studies) described 11 evaluated  
5 interventions and the other 19 (12 research studies, 2 editorials, 2 blogs, 1  
6 commentary, 1 essay, and 1 perspective) described 20 non-evaluated interventions.  
7  
8

9  
10 Among all included references, we identified 31 interventions to improve adherence to  
11 reporting guidelines. Some of these interventions appeared in more than one  
12 reference and some of the references contained more than one intervention. From  
13 those 31 interventions, 4 were categorised as “Training” (1,17-21), 2 as “Improved  
14 understanding” (22,23), 15 as “Encouraging adherence” (11,12,20,24,25,27,29-114), 8  
15 as “Monitoring adherence and providing feedback” (13,115-117,119,121,122,125), and  
16 2 as “Collaboration among authors and experts” (25,84,126-128). Figure 2 displays all  
17 those interventions according to their categorization and the research stage where  
18 they can be performed. Evaluated interventions are highlighted in bold.  
19 Supplementary file 3 provides further details of the implementation of the evaluated  
20 interventions.  
21  
22

23  
24 Research gaps identified (see Figure 3) included the evaluation of interventions (i) on  
25 training and improved understanding of reporting guidelines, and (ii) at early stages of  
26 research (education, grant writing or protocol writing), and (iii) after the process of  
27 author revision of the manuscript (copyediting or post-publication peer review).  
28  
29

30  
31 Hereafter, we present a brief description of the interventions found for each category.  
32 For the sake of clarity, the rationale of those interventions is shown in Table 1.  
33  
34

### 35 36 37 38 39 40 41 42 43 **Training**

44  
45 In a first step, health profession schools could incorporate reporting guidelines into  
46 curricula that address research methodology and publication standards (17–21). In line  
47 with this, students could develop protocols for coursework and research using  
48 reporting guidelines such as SPIRIT (randomised trials) and PRISMA-P (systematic  
49 reviews), and educators may encourage adherence to those guidelines and grade the  
50 protocols using them (20). For their part, funders may consider supporting author  
51 training on reporting guidelines (1). Finally, journals or publishers may consider  
52  
53  
54  
55  
56  
57  
58  
59  
60

1  
2  
3 investing resources in training editors and reviewers on the content and use of  
4 reporting guidelines (1,21).

### 6 7 ***Improved understanding***

8  
9  
10 Reporting guideline developers might consider translating them to new languages that  
11 have not been addressed yet (22). Also, further databases of examples of good  
12 reporting for different reporting guidelines that are accessible to authors can be  
13 developed, as has been done for CONSORT (23).

### 14 15 16 17 ***Encouraging adherence***

18  
19  
20 First, international scientific associations may play an important role in disseminating  
21 and popularizing reporting guidelines to large audiences (24). For their part, funders  
22 might require authors to use reporting guidelines as a template for grant application  
23 proposals (20). Later on, research ethics boards may require that protocols submitted  
24 for ethical approval clearly state which reporting guidelines the study will be using  
25 based on the study design, and that reporting guideline checklists are part of the  
26 application for ethics approval (11). Funders could also encourage adherence to  
27 reporting guidelines by asking for reporting guideline checklists as part of the authors'  
28 report (20,25).

29  
30  
31  
32  
33  
34  
35  
36  
37  
38  
39  
40  
41  
42  
43  
44  
45  
46  
47  
48  
49  
50  
51  
52  
53  
54  
55  
56  
57  
58  
59  
60  
One initiative to support author to adhere to reporting guidelines at the writing stage  
of the manuscript has been COBWEB, a writing aid tool that aims to help authors  
adequately combine the different extensions of the CONSORT statement (12). This tool  
divided the CONSORT items into bullet points showing the key elements that need to  
be reported together with examples of adequate reporting. The impact of COBWEB  
was evaluated through a randomised trial that showed a large effect of this tool, with a  
mean improvement in CONSORT scores of 2.1 on a 0–10 scale for the intervention  
group as compared to the control group (12). A second option to support authors at  
manuscript writing might be to follow a more structured approach including new  
subheadings, boxes and tables with key information for different kinds of study  
designs. For example, ClinicalTrials.gov requires a structured approach to register a  
study or to report its results (26). This has been shown to be effective: some results

1  
2  
3 posted on [clinicaltrials.gov](http://clinicaltrials.gov), especially harms, are more complete than those in  
4 corresponding journal articles reporting the same trials (27). In line with this, the  
5 American Journal of Orthodontics and Dentofacial Orthopedics (AJO-DO) updated the  
6 traditional RCT format and made readily available a sample article including comments  
7 and instructions (28). Finally, another option to help authors avoid omissions when  
8 writing the manuscript could be that they mark up the text and show where each item  
9 of the relevant checklist is addressed (29).  
10  
11  
12  
13  
14

15  
16 At manuscript submission stage, different editorial actions have been taken to improve  
17 adherence to reporting guidelines. The most popular is what has traditionally been  
18 defined as journal endorsement of reporting guidelines, which is usually defined as  
19 one or more of the three following interventions: (a) journal editorial statement  
20 endorsing certain reporting guidelines; (b) requirement or recommendation in  
21 journal's 'Instructions to Authors' to follow certain reporting guidelines when  
22 preparing their manuscript; or (c) requirement for authors to submit the appropriate  
23 reporting guideline checklist together with their manuscript indicating page numbers  
24 corresponding to each item (6). Dozens of observational studies have explored the  
25 possible effect of journal endorsement of different reporting guidelines in different  
26 clinical areas (30–109). A recent systematic review focused on CONSORT evaluations  
27 showed relative but suboptimal improvements in the completeness of reporting in  
28 journals by following the aforementioned policies (6), while another systematic review  
29 considering 9 other guidelines showed no improvements (3).  
30  
31  
32  
33  
34  
35  
36  
37  
38  
39  
40

41 Journals might also consider other strategies to enhance adherence to reporting  
42 guidelines at submission. A first option could be to develop shorter, core versions of  
43 reporting guidelines containing key items (110). Second, they might introduce  
44 publication officers in order to provide guidance to authors on preparing manuscripts  
45 for submission (111). Third, they may ask authors to populate the relevant checklist  
46 with text from their report and not accept a submission unless this is provided (112).  
47  
48  
49  
50

51  
52 Finally, editors may suggest that peer reviewers use reporting guidelines (113). In  
53 addition, by asking peer reviewers questions about whether the author has followed  
54 reporting guidelines, this might be an indirect way to encourage them (114).  
55  
56  
57  
58  
59  
60

### ***Monitoring adherence and providing feedback***

Having recognised that journal endorsement without implementation does not guarantee adherence to reporting guidelines, some journals have opted for implementing reporting guidelines at peer review. First, an associate editor may assess manuscripts for adherence to the relevant reporting guideline and ask authors to make changes accordingly (115). This process may be repeated until the associate editor thinks that the manuscript can move to the next step of the review process, leading to an editorial decision. This intervention was evaluated at the AJO-DO and showed satisfactory results: 33 of 37 items reached perfect compliance (115). Second, peer reviewers could also assess the manuscripts against the appropriate checklist (116). While the observed effect of this intervention was slightly positive, it was smaller than hypothesized. In fact, investigators pointed out that authors tended to comply better with suggestions coming from standard reviews rather than from reviews against reporting guidelines, implying that it might be difficult to adhere to high methodological standards at late stages of research if these standards are not considered earlier in the research process. Third, journals could also ask trained editorial assistants to check manuscripts against reporting guidelines (117) or to implement automatic peer review tools such as Statreviewer (118), software that automatically checks adherence to reporting guidelines and evaluates the appropriate use and reporting of statistical tests (119). Currently, its performance is being assessed through a pilot trial in collaboration with four BioMed Central Journals (119). In any of those cases, emails could be sent to authors asking them to revise the manuscript according to guidelines (13). To do this, the EQUATOR Network has provided standard letters that can be used a) after checks by an editor or a single peer reviewer, b) after full peer review, or c) alongside acceptance (120). Furthermore, at the time of author revision of the manuscript, Hopewell et al. found no significant effect when incorporating WebCONSORT, a web-based tool that generates a unique list of items customised to the trial design, to the revision process of journals that endorsed CONSORT but had no active policy for implementing it (121). Finally, in a late stage of the publication process, copyediting of the manuscript could also ensure that all items are covered (122).

1  
2  
3 Once the paper is published, the scientific community could use online platforms of  
4 post-publication peer review such as PubPeer (123) or ScienceOpen (124) to evaluate  
5 the adherence to reporting guidelines of published articles and to provide feedback to  
6 authors (125).  
7  
8  
9

### 10 ***Collaboration among authors and experts***

11  
12  
13 Authors may benefit from collaboration with experts at different stages of research.  
14 On the one hand, the involvement of statisticians (or epidemiologists or other  
15 quantitative methodologists) in the design, conduct or reporting of the study might  
16 contribute to properly reporting key areas such as sample size calculation,  
17 randomization, blinding, and appropriate statistical analysis (126). While one study did  
18 not find a statistically significant positive relationship between CONSORT scores and  
19 statistician involvement (127), others did (84,126,128). On the other hand, it has been  
20 hypothesized that the involvement of medical writers during the manuscript writing  
21 stage of research could improve the completeness of reporting (25).  
22  
23  
24  
25  
26  
27  
28  
29

### 30 **Discussion**

31  
32  
33 In this scoping review, we identified 31 interventions to improve adherence to  
34 reporting guidelines. We have also determined the gaps in research on the evaluation  
35 of this type of interventions. By considering a wide range of reporting guidelines as  
36 well as their extensions and merging the evidence found in the published and grey  
37 literature, this review provides a broad picture of how the problem of enhancing  
38 adherence to reporting guidelines has been tackled so far and could be faced in the  
39 future.  
40  
41  
42  
43  
44

45  
46 This study reveals that it is primarily journals that have made most of the efforts to  
47 improve adherence to reporting guidelines in health research – although they can  
48 certainly do more. Typically, their strategies range from making available editorial  
49 statements that endorse certain reporting guidelines, recommending or requiring  
50 authors to follow reporting guidelines in the “Instructions to authors”, and requiring  
51 authors to submit a reporting guideline checklist together with the manuscript, with  
52 page numbers indicated for each item. However, these strategies have been shown  
53  
54  
55  
56  
57  
58  
59  
60



1  
2  
3 not to have the desired effect (3,6,129). Recent research has called for more active and  
4 enforced journal policies throughout the editorial process, such as requiring the use of  
5 structured approaches with new subheads adapted to different kinds of study designs  
6 (27), which was also found to be beneficial in a new study outside of our search period  
7 (130); providing guidance on manuscript preparation (111); making sure the peer  
8 review process involves editorial assistants who have specific training on reporting  
9 issues (117); and implementing automatic peer review tools (119). Journals will vary in  
10 their ability to make some of these strategies effective, depending on factors such as  
11 their resources, their guidelines to peer reviewers and the dedication of their editors –  
12 many editors and editorial staff work part-time and have limited amount of time.  
13  
14  
15  
16  
17  
18  
19

20  
21 Moreover, editors' education and performance should be improved. A recent study  
22 pointed out that more than a third (39%) of the manuscripts classified as randomised  
23 trials by the editorial staff were not actually randomised trials (121,131).  
24 Consequently, it seems difficult to improve author and peer reviewer adherence to  
25 reporting guidelines if journal gatekeepers are not properly trained in methodological  
26 and reporting issues.  
27  
28  
29  
30

31  
32 Apart from journals, editors and peer reviewers, other key stakeholders such as  
33 medical schools, research funders, universities and other research institutions should  
34 also take responsibility regarding this issue. This scoping review provides some  
35 strategies to follow. However, as the problem is complex and the possible  
36 interventions are varied, enhancing the completeness of reporting most likely depends  
37 not so much on any isolated action but on a set of strategies by several different  
38 stakeholders. These could be enacted at different stages of research, from education  
39 to article post-publication.  
40  
41  
42  
43  
44  
45  
46

47 For interventions aiming to improve adherence to reporting guidelines, we should  
48 require the same level of evidence that we require for interventions to improve health.  
49 For this reason, it is striking that we found only 4 published randomised trials that  
50 evaluated interventions to improve adherence to reporting guidelines  
51 (12,113,116,121). Among these trials, statistically significant effect of the intervention  
52 was only observed for the use of the writing aid tool for authors COBWEB (12). While  
53  
54  
55  
56  
57  
58  
59  
60

1  
2  
3 performing an additional review against reporting guidelines showed slightly positive  
4 but not significant effect (116), suggesting the use of reporting guidelines to peer  
5 reviewers (113) or implementing at the process of author revision of the manuscript  
6 the web-based tool WebCONSORT showed no benefit (121). The rest of the  
7 evaluations of interventions found (86 of 90) were observational studies, whose results  
8 are subject to the influence of confounding factors (6). For example, evaluations of the  
9 effect of journal endorsement may be influenced by whether different journals are  
10 actively checking that authors adhere to the requirements or recommendations they  
11 provide to authors at submission (6). For all these reasons, future randomised trials  
12 should be performed to evaluate further interventions to improve adherence to  
13 reporting guidelines. Moreover, these trials might consider addressing some of the  
14 research gaps identified in this review, such as improving adherence to reporting  
15 guidelines at the grant application or protocol writing stages.  
16  
17  
18  
19  
20  
21  
22  
23  
24  
25

26 A few of the interventions found in this review were shown to enhance adherence to  
27 reporting guidelines. However, it is noteworthy there is no evidence that some  
28 successful interventions (12,27,115) have been implemented more widely later. For  
29 this reason, more resources and efforts are needed to further implement these  
30 interventions in other settings, evaluate the effect, and share the results with the  
31 scientific community. In any case, it is important to keep in mind that contemporary  
32 publication culture may harm the potential improvements in reporting quality. This  
33 could result from the fact that most scientists feel that the primary evaluation tool of  
34 their research is the quantity of their scientific output rather than its quality (132); and  
35 such attitudes may undermine the potential effect of any intervention to improve  
36 adherence to reporting guidelines.  
37  
38  
39  
40  
41  
42  
43  
44  
45

46 Our scoping review has some limitations. First, we did not formally assess the  
47 methodological quality of the studies that evaluated interventions. Second, restricting  
48 to certain databases or not having standard search terms for the databases searched  
49 may have excluded relevant publications. Third, it is possible that we could have  
50 missed evidence of possible interventions that may have never been reflected in the  
51 published or grey literature but are instead used in practice and continue to be used.  
52  
53  
54  
55  
56  
57  
58  
59  
60

1  
2  
3 For example, journals might be applying specific editorial strategies that are not  
4 publicly available on their websites or in the published literature.  
5  
6

## 7 **Conclusion**

8  
9  
10 This review is part of a larger project whose next goals are (i) to capture editors'  
11 perceptions on the barriers and facilitators of some promising interventions identified  
12 in this review, (ii) to explore new possible interventions, and (iii) to evaluate one of  
13 these interventions in collaboration with BMJ Open.  
14  
15

16  
17  
18 Improving adherence to reporting guidelines is one of the key issues in order to  
19 enhance complete and accurate reporting and therefore reduce waste in research. For  
20 example, a decrease in waste of research from 85% to 70% would double the output of  
21 valuable research and innovation.  
22  
23

24  
25  
26 Different stakeholders – such as research funders, ethics boards, and journals – should  
27 identify, implement and evaluate further interventions to improve adherence to  
28 reporting guidelines.  
29  
30

## 31 **List of abbreviations**

32  
33  
34 AJO-DO: American Journal of Orthodontics and Dentofacial Orthopedics; CONSORT:  
35 CONSolidated Standards Of Reporting Trials; COBWEB: CONSORT-based web tool;  
36 EQUATOR: Enhancing the QUALity and Transparency Of Health Research; RCT:  
37 Randomised Controlled Trial; RG: Reporting Guideline; SPIRIT: Standard Protocol Items:  
38 Recommendations for Interventional Trials; PRISMA: Preferred Reporting Items for  
39 Systematic Reviews and Meta-Analyses  
40  
41  
42  
43  
44  
45

## 46 **Declarations**

47  
48  
49 **Funding:** This scoping review belongs to the ESR 14 research project from the Methods in  
50 Research on Research (MiRoR) project (<http://mirror-ejd.eu/>), which has received funding from  
51 the European Union's Horizon 2020 research and innovation programme under the Marie  
52 Skłodowska-Curie grant agreement No 676207. DM is supported through a University Research  
53 Chair (University of Ottawa).  
54  
55  
56  
57  
58  
59  
60

1  
2  
3 **Competing interests:** DA and DM are Directors of the UK and Canadian EQUATOR Centres,  
4 respectively. IB is deputy director of French EQUATOR Centre.  
5  
6

7 **Author contributions:** All authors contributed to conceptualizing and designing the study. DB,  
8 EC, and JJK independently performed screening. DB and JJK independently performed data  
9 extraction. DB performed initial data synthesis and EC, IB, DM, DGA, and JJK refined it. DB  
10 drafted the manuscript. EC, IB, DM, DGA, and JJK made major revisions. All authors read and  
11 approved the final version of the manuscript.  
12  
13  
14

15 **Availability of data and materials:** The datasets used and/or analysed during the current study  
16 are available from the corresponding author on reasonable request.  
17  
18

19 **Acknowledgements:** The authors thank the MiRoR Project (<http://mirror-ejd.eu/>) and Marie  
20 Sklodowska-Curie Actions for their support. The authors also thank Matt Elmore for editorial  
21 help.  
22  
23  
24

## 25 **References**

- 26  
27  
28 1. Glasziou P, Altman DG, Bossuyt P, Boutron I, Clarke M, Julious S, et al. Reducing  
29 waste from incomplete or unusable reports of biomedical research. *Lancet*  
30 [Internet]. 2014 Jan 18 [cited 2017 Sep 29];383(9913):267–76. Available from:  
31 <http://www.ncbi.nlm.nih.gov/pubmed/24411647>  
32  
33  
34 2. EQUATOR Network. Library for health research reporting. Available from:  
35 [http://www.equator-network.org/resource-centre/library-of-health-research-](http://www.equator-network.org/resource-centre/library-of-health-research-reporting)  
36 [reporting](http://www.equator-network.org/resource-centre/library-of-health-research-reporting)  
37  
38  
39 3. Stevens A, Shamseer L, Weinstein E, Yazdi F, Turner L, Thielman J, et al. Relation  
40 of completeness of reporting of health research to journals' endorsement of  
41 reporting guidelines: systematic review. *BMJ* [Internet]. 2014 Jun 25 [cited 2017  
42 Jun 7];348(jun25 2):g3804–g3804. Available from:  
43 <http://www.bmj.com/cgi/doi/10.1136/bmj.g3804>  
44  
45  
46 4. Schulz KF, Altman DG, Moher D, CONSORT Group. CONSORT 2010 statement:  
47 updated guidelines for reporting parallel group randomised trials. *BMJ*  
48 [Internet]. 2010 Mar 23 [cited 2018 Mar 3];340:c332. Available from:  
49  
50  
51  
52  
53  
54  
55  
56  
57  
58  
59  
60

- 1  
2  
3 <http://www.ncbi.nlm.nih.gov/pubmed/20332509>  
4  
5  
6 5. Plint AC, Moher D, Morrison A, Schulz K, Altman DG, Hill C, et al. Does the  
7 CONSORT checklist improve the quality of reports of randomised controlled  
8 trials? A systematic review. *Med J Aust* [Internet]. 2006 Sep 4 [cited 2017 Feb  
9 24];185(5):263–7. Available from:  
10 <http://www.ncbi.nlm.nih.gov/pubmed/16948622>  
11  
12  
13  
14  
15 6. Turner L, Shamseer L, Altman DG, Schulz KF, Moher D. Does use of the CONSORT  
16 Statement impact the completeness of reporting of randomised controlled trials  
17 published in medical journals? A Cochrane review. *Syst Rev* [Internet]. 2012 Nov  
18 29 [cited 2017 Feb 24];1(1):60. Available from:  
19 [http://systematicreviewsjournal.biomedcentral.com/articles/10.1186/2046-](http://systematicreviewsjournal.biomedcentral.com/articles/10.1186/2046-4053-1-60)  
20 [4053-1-60](http://systematicreviewsjournal.biomedcentral.com/articles/10.1186/2046-4053-1-60)  
21  
22  
23  
24  
25  
26 7. Bereza BG, Machado M, Einarson TR. Assessing the reporting and scientific  
27 quality of meta-analyses of randomized controlled trials of treatments for  
28 anxiety disorders. *Ann Pharmacother* [Internet]. 2008 Oct 26 [cited 2017 Feb  
29 23];42(10):1402–9. Available from:  
30 [http://www.embase.com/search/results?subaction=viewrecord&from=export&i](http://www.embase.com/search/results?subaction=viewrecord&from=export&id=L352440213)  
31 [d=L352440213](http://www.embase.com/search/results?subaction=viewrecord&from=export&id=L352440213)  
32  
33  
34  
35  
36  
37  
38 8. Fung AE, Palanki R, Bakri SJ, Depperschmidt E, Gibson A. Applying the CONSORT  
39 and STROBE statements to evaluate the reporting quality of neovascular age-  
40 related macular degeneration studies. *Ophthalmology* [Internet]. 2009 Feb  
41 [cited 2017 Jun 26];116(2):286–96. Available from:  
42 <http://linkinghub.elsevier.com/retrieve/pii/S0161642008009020>  
43  
44  
45  
46  
47 9. Rios LP, Oduyungbo A, Moitri MO, Rahman MO, Thabane L. Quality of  
48 reporting of randomized controlled trials in general endocrinology literature. *J*  
49 *Clin Endocrinol Metab* [Internet]. 2008 Oct [cited 2017 Feb 24];93(10):3810–6.  
50 Available from: <http://press.endocrine.org/doi/10.1210/jc.2008-0817>  
51  
52  
53  
54  
55 10. Shea B, Bouter LM, Grimshaw JM, Francis D, Ortiz Z, Wells GA, et al. Scope for  
56  
57  
58  
59

- 1  
2  
3 improvement in the quality of reporting of systematic reviews. From the  
4 Cochrane Musculoskeletal Group. J Rheumatol [Internet]. 2006 Jan [cited 2017  
5 Feb 24];33(1):9–15. Available from:  
6 <http://www.ncbi.nlm.nih.gov/pubmed/16267878>  
7  
8  
9  
10  
11 11. Samaan Z, Mbuagbaw L, Kosa D, Borg Debono V, Dillenburg R, Zhang S, et al. A  
12 systematic scoping review of adherence to reporting guidelines in health care  
13 literature. J Multidiscip Healthc [Internet]. 2013 May [cited 2017 Jun 26];6:169–  
14 88. Available from: [http://www.dovepress.com/a-systematic-scoping-review-of-](http://www.dovepress.com/a-systematic-scoping-review-of-adherence-to-reporting-guidelines-in-he-peer-reviewed-article-JMDH)  
15 [adherence-to-reporting-guidelines-in-he-peer-reviewed-article-JMDH](http://www.dovepress.com/a-systematic-scoping-review-of-adherence-to-reporting-guidelines-in-he-peer-reviewed-article-JMDH)  
16  
17  
18  
19  
20 12. Barnes C, Boutron I, Giraudeau B, Porcher R, Altman DG, Ravaud P. Impact of an  
21 online writing aid tool for writing a randomized trial report: the COBWEB  
22 (Consort-based WEB tool) randomized controlled trial. BMC Med [Internet].  
23 2015 Sep 15 [cited 2017 Feb 24];13(1):221. Available from:  
24 <http://bmcmmedicine.biomedcentral.com/articles/10.1186/s12916-015-0460-y>  
25  
26  
27  
28  
29  
30 13. Hopewell S, Ravaud P, Baron G, Boutron I. Effect of editors' implementation of  
31 CONSORT guidelines on the reporting of abstracts in high impact medical  
32 journals: interrupted time series analysis. 2012 Jun 22 [cited 2017 Jan  
33 16];344(jun22 1). Available from:  
34 <http://www.ncbi.nlm.nih.gov/pubmed/22730543>  
35  
36  
37  
38  
39 14. Blanco D, Kirkham JJ, Altman DG, Moher D, Boutron I, Cobo E. Interventions to  
40 improve adherence to reporting guidelines in health research: a scoping review  
41 protocol. BMJ Open [Internet]. 2017;7(11):e017551. Available from:  
42 <http://bmjopen.bmj.com/lookup/doi/10.1136/bmjopen-2017-017551>  
43  
44  
45  
46  
47 15. Reviewers' Manual. 2015; Available from: [www.joannabriggs.org](http://www.joannabriggs.org)  
48  
49  
50 16. EQUATOR Network. Available from: <http://www.equator-network.org/>  
51  
52  
53 17. Ma B, Qi G, Lin X, Wang T, Chen Z, Yang K. Epidemiology, quality, and reporting  
54 characteristics of systematic reviews of acupuncture interventions published in  
55 Chinese journals. J Altern Complement Med [Internet]. 2012 Sep [cited 2017 Jul  
56  
57  
58  
59  
60

- 1  
2  
3 17];18(9):813–7. Available from:  
4 <http://online.liebertpub.com/doi/abs/10.1089/acm.2011.0274>  
5  
6  
7 18. Larson EL, Cortazal M. Publication guidelines need widespread adoption. *J Clin*  
8 *Epidemiol* [Internet]. 2012 Mar [cited 2017 Jul 21];65(3):239–46. Available from:  
9 <http://linkinghub.elsevier.com/retrieve/pii/S0895435611002290>  
10  
11  
12  
13 19. Sarkis-Onofre R, Cenci MS, Moher D, Pereira-Cenci T. Research Reporting  
14 *Guidelines in Dentistry: A Survey of Editors*. *Braz Dent J* [Internet]. 2017 [cited  
15 2017 Nov 9];28(1):3–8. Available from: [http://dx.doi.org/10.1590/0103-](http://dx.doi.org/10.1590/0103-6440201601426)  
16 [6440201601426](http://dx.doi.org/10.1590/0103-6440201601426)  
17  
18  
19  
20  
21 20. Shamseer L, Moher D, Clarke M, Ghersi D, Liberati A, Petticrew M, et al.  
22 Preferred reporting items for systematic review and meta-analysis protocols  
23 (PRISMA-P) 2015: elaboration and explanation. *BMJ* [Internet]. 2015 Jan 2 [cited  
24 2017 Feb 24];349(jan02 1):g7647–g7647. Available from:  
25 <http://www.bmj.com/cgi/doi/10.1136/bmj.g7647>  
26  
27  
28  
29  
30  
31 21. Simera I, Moher D, Hirst A, Hoey J, Schulz KF, Altman DG. Transparent and  
32 accurate reporting increases reliability, utility, and impact of your research:  
33 reporting guidelines and the EQUATOR Network. *BMC Med* [Internet].  
34 2010;8(1):24. Available from:  
35 <http://bmcmmedicine.biomedcentral.com/articles/10.1186/1741-7015-8-24>  
36  
37  
38  
39  
40 22. Kim KH, Kang JW, Lee MS, Lee J-D. Assessment of the quality of reporting in  
41 randomised controlled trials of acupuncture in the Korean literature using the  
42 CONSORT statement and STRICTA guidelines. *BMJ Open* [Internet]. 2014 Jul 29  
43 [cited 2017 Jul 17];4(7):e005068. Available from:  
44 <http://bmjopen.bmj.com/cgi/doi/10.1136/bmjopen-2014-005068>  
45  
46  
47  
48  
49  
50 23. Moher D, Hopewell S, Schulz KF, Altman DG. Resources for authors of reports of  
51 randomized trials: harnessing the wisdom of authors, editors, and readers. *Trials*  
52 [Internet]. 2011;12(1):98. Available from:  
53 <http://trialsjournal.biomedcentral.com/articles/10.1186/1745-6215-12-98>  
54  
55  
56  
57  
58  
59  
60

- 1  
2  
3 24. Verbeek J. Moose Consort Strobe and Miame Stard Remark or how can we  
4 improve the quality of reporting studies. Scand J Work Environ Health [Internet].  
5 2008 Jun [cited 2017 Feb 24];34(3):165–7. Available from:  
6 <http://www.ncbi.nlm.nih.gov/pubmed/18728905>  
7  
8  
9  
10 25. Implementing Reporting Guidelines: Why and How, for Journal Editors  
11 [Internet]. World Association of Medical Editors. Available from:  
12 [https://wame.blog/2017/09/17/implementing-reporting-guidelines-why-and-](https://wame.blog/2017/09/17/implementing-reporting-guidelines-why-and-how-for-journal-editors/)  
13 [how-for-journal-editors/](https://wame.blog/2017/09/17/implementing-reporting-guidelines-why-and-how-for-journal-editors/)  
14  
15  
16  
17  
18 26. ClinicalTrials.gov. National Library of Medicine (US). Available from:  
19 <https://clinicaltrials.gov/>  
20  
21  
22  
23 27. Riveros C, Dechartres A, Perrodeau E, Haneef R, Boutron I, Ravaud P. Timing and  
24 Completeness of Trial Results Posted at ClinicalTrials.gov and Published in  
25 Journals. [cited 2018 Mar 4]; Available from:  
26 [http://journals.plos.org/plosmedicine/article/file?id=10.1371/journal.pmed.100](http://journals.plos.org/plosmedicine/article/file?id=10.1371/journal.pmed.1001566&type=printable)  
27 [1566&type=printable](http://journals.plos.org/plosmedicine/article/file?id=10.1371/journal.pmed.1001566&type=printable)  
28  
29  
30  
31  
32 28. Pandis N, Turpin DL. Enhancing CONSORT compliance for improved reporting of  
33 randomized controlled trials. Am J Orthod Dentofac Orthop [Internet]. 2014 Jan  
34 [cited 2017 Jul 21];145(1):1. Available from:  
35 [http://www.embase.com/search/results?subaction=viewrecord&from=export&i](http://www.embase.com/search/results?subaction=viewrecord&from=export&id=L372038916)  
36 [d=L372038916](http://www.embase.com/search/results?subaction=viewrecord&from=export&id=L372038916)  
37  
38  
39  
40  
41  
42 29. Rupinski M, Zagorowicz E, Regula J, Fijuth J, Kraszewska E, Polkowski M, et al.  
43 Randomized Comparison of Three Palliative Regimens Including Brachytherapy,  
44 Photodynamic Therapy and APC in Patients With Malignant Dysphagia  
45 (CONSORT 1a) (Revised II). Am J Gastroenterol [Internet]. 2011 Sep 14 [cited  
46 2018 Mar 4];106(9):1612–20. Available from:  
47 <http://www.nature.com/articles/ajg2011178>  
48  
49  
50  
51  
52  
53 30. Kidwell CS, Liebeskind DS, Starkman S, Saver JL. Trends in acute ischemic stroke  
54 trials through the 20th century. Stroke [Internet]. 2001 Jun [cited 2017 Nov  
55  
56  
57  
58  
59  
60



- 1  
2  
3 9];32(6):1349–59. Available from:  
4 <http://www.ncbi.nlm.nih.gov/pubmed/11387498>  
5  
6  
7 31. Sánchez-Thorin JC, Cortés MC, Montenegro M, Villate N. The quality of reporting  
8 of randomized clinical trials published in Ophthalmology. *Ophthalmology*  
9 [Internet]. 2001 Feb [cited 2017 Feb 24];108(2):410–5. Available from:  
10 <http://www.embase.com/search/results?subaction=viewrecord&from=export&i>  
11 [d=L32115976](http://www.embase.com/search/results?subaction=viewrecord&from=export&id=L32115976)  
12  
13  
14  
15  
16 32. Moher D, Jones A, Lepage L, CONSORT Group (Consolidated Standards for  
17 Reporting of Trials). Use of the CONSORT statement and quality of reports of  
18 randomized trials: a comparative before-and-after evaluation. *JAMA* [Internet].  
19 2001 Apr 18 [cited 2017 Jun 7];285(15):1992–5. Available from:  
20 <http://www.ncbi.nlm.nih.gov/pubmed/11308436>  
21  
22  
23  
24  
25  
26 33. Devereaux PJ, Manns BJ, Ghali WA, Quan H, Guyatt GH. The reporting of  
27 methodological factors in randomized controlled trials and the association with  
28 a journal policy to promote adherence to the Consolidated Standards of  
29 Reporting Trials (CONSORT) checklist. *Control Clin Trials* [Internet]. 2002 Aug  
30 [cited 2017 Feb 24];23(4):380–8. Available from:  
31 <http://www.embase.com/search/results?subaction=viewrecord&from=export&i>  
32 [d=L34874890](http://www.embase.com/search/results?subaction=viewrecord&from=export&id=L34874890)  
33  
34  
35  
36  
37  
38  
39 34. Montori VM, Bhandari M, Devereaux PJ, Manns BJ, Ghali WA, Guyatt GH. In the  
40 dark: the reporting of blinding status in randomized controlled trials. *J Clin*  
41 *Epidemiol* [Internet]. 2002 Aug [cited 2017 Nov 9];55(8):787–90. Available from:  
42 <http://www.ncbi.nlm.nih.gov/pubmed/12384193>  
43  
44  
45  
46  
47 35. Hill CL, LaValley MP, Felson DT. Secular changes in the quality of published  
48 randomized clinical trials in rheumatology. *Arthritis Rheum* [Internet]. 2002 Mar  
49 [cited 2017 Nov 9];46(3):779–84. Available from:  
50 <http://doi.wiley.com/10.1002/art.512>  
51  
52  
53  
54  
55 36. Faunce TA, Buckley NA. Of consents and CONSORTs: reporting ethics, law, and  
56  
57  
58  
59  
60

- 1  
2  
3 human rights in RCTs involving monitored overdose of healthy volunteers pre  
4 and post the &quot;CONSORT&quot; guidelines. *J Toxicol Clin Toxicol* [Internet].  
5 2003 [cited 2017 Nov 9];41(2):93–9. Available from:  
6 <http://www.ncbi.nlm.nih.gov/pubmed/12733843>  
7  
8  
9  
10  
11 37. Halpern SH, Darani R, Douglas MJ, Wight W, Yee J. Compliance with the  
12 CONSORT checklist in obstetric anaesthesia randomised controlled trials. *Int J*  
13 *Obstet Anesth* [Internet]. 2004 Oct [cited 2017 Feb 24];13(4):207–14. Available  
14 from: <http://www.ncbi.nlm.nih.gov/pubmed/15477048>  
15  
16  
17  
18 38. Hewitt C, Hahn S, Torgerson DJ, Watson J, Bland JM. Adequacy and reporting of  
19 allocation concealment: review of recent trials published in four general medical  
20 journals. *BMJ* [Internet]. 2005 May 7 [cited 2017 Nov 9];330(7499):1057–8.  
21 Available from: <http://www.bmj.com/cgi/doi/10.1136/bmj.38413.576713.AE>  
22  
23  
24  
25  
26 39. Greenfield MLVH, Rosenberg AL, O'Reilly M, Shanks AM, Sliwinski MJ, Naus  
27 MD. The Quality of Randomized Controlled Trials in Major Anesthesiology  
28 Journals. *Anesth Analg* [Internet]. 2005 Jun [cited 2017 Nov 9];100(6):1759–64.  
29 Available from: <http://www.ncbi.nlm.nih.gov/pubmed/15920210>  
30  
31  
32  
33  
34 40. Llorca J, Martínez-Sanz F, Prieto-Salceda D, Fariñas-Alvarez C, Chinchón MV,  
35 Quinones D, et al. Quality of controlled clinical trials on glaucoma and  
36 intraocular high pressure. *J Glaucoma* [Internet]. 2005 Jun [cited 2017 Nov  
37 9];14(3):190–5. Available from:  
38 <http://www.ncbi.nlm.nih.gov/pubmed/15870599>  
39  
40  
41  
42  
43  
44 41. Haahr MT, Hróbjartsson A. Who is blinded in randomized clinical trials? A study  
45 of 200 trials and a survey of authors. *Clin Trials* [Internet]. 2006;3(4):360–5.  
46 Available from: <http://www.ncbi.nlm.nih.gov/pubmed/17060210>  
47  
48  
49  
50 42. Kober T, Trelle S, Engert A. Reporting of randomized controlled trials in Hodgkin  
51 lymphoma in biomedical journals. *J Natl Cancer Inst* [Internet]. 2006 May 3  
52 [cited 2017 Feb 24];98(9):620–5. Available from:  
53 <http://www.ncbi.nlm.nih.gov/pubmed/16670387>  
54  
55  
56  
57  
58  
59  
60

- 1  
2  
3 43. Biondi-Zoccai GGL, Lotrionte M, Abbate A, Testa L, Remigi E, Burzotta F, et al.  
4 Compliance with QUOROM and quality of reporting of overlapping meta-  
5 analyses on the role of acetylcysteine in the prevention of contrast associated  
6 nephropathy: case study. *BMJ* [Internet]. 2006 Jan 28 [cited 2017 Nov  
7 9];332(7535):202–9. Available from:  
8 <http://www.bmj.com/cgi/doi/10.1136/bmj.38693.516782.7C>  
9  
10  
11  
12  
13  
14 44. Balasubramanian SP, Wiener M, Alshameeri Z, Tiruvoipati R, Elbourne D, Reed  
15 MW, et al. Standards of reporting of randomized controlled trials in general  
16 surgery: Can we do better? *Ann Surg* [Internet]. 2006 Nov [cited 2017 Feb  
17 24];244(5):663–7. Available from:  
18 <http://www.ncbi.nlm.nih.gov/pubmed/17060756>  
19  
20  
21  
22  
23  
24 45. Dias S, McNamee R, Vail A. Evidence of improving quality of reporting of  
25 randomized controlled trials in subfertility. *Hum Reprod* [Internet]. 2006 Oct  
26 [cited 2017 Feb 24];21(10):2617–27. Available from:  
27 <http://www.ncbi.nlm.nih.gov/pubmed/16793995>  
28  
29  
30  
31  
32 46. Smidt N, Rutjes AWS, van der Windt DAWM, Ostelo RWJG, Bossuyt PM, Reitsma  
33 JB, et al. The quality of diagnostic accuracy studies since the STARD statement:  
34 Has it improved? *Neurology* [Internet]. 2006 Sep 12 [cited 2018 Mar  
35 12];67(5):792–7. Available from:  
36 <http://www.ncbi.nlm.nih.gov/pubmed/16966539>  
37  
38  
39  
40  
41 47. Coppus SFPJ, van der Veen F, Bossuyt PMM, Mol BWJ. Quality of reporting of  
42 test accuracy studies in reproductive medicine: impact of the Standards for  
43 Reporting of Diagnostic Accuracy (STARD) initiative. *Fertil Steril* [Internet]. 2006  
44 Nov [cited 2017 Jun 26];86(5):1321–9. Available from:  
45 [http://www.embase.com/search/results?subaction=viewrecord&from=export&i  
46 d=L44602037](http://www.embase.com/search/results?subaction=viewrecord&from=export&id=L44602037)  
47  
48  
49  
50  
51  
52 48. Tiruvoipati R, Balasubramanian SP, Atturu G, Peek GJ, Elbourne D. Improving the  
53 quality of reporting randomized controlled trials in cardiothoracic surgery: the  
54 way forward. *J Thorac Cardiovasc Surg* [Internet]. 2006 Aug [cited 2017 Jul  
55  
56  
57  
58  
59  
60

- 1  
2  
3 21];132(2):233–40. Available from:  
4 <http://www.ncbi.nlm.nih.gov/pubmed/16872940>  
5  
6  
7 49. Mahoney J, Ellison J. Assessing the quality of glucose monitor studies: a critical  
8 evaluation of published reports. *Clin Chem* [Internet]. 2007 Jun 19 [cited 2017  
9 Nov 9];53(6):1122–8. Available from:  
10 <http://www.clinchem.org/cgi/doi/10.1373/clinchem.2006.083493>  
11  
12  
13  
14  
15 50. Poolman RW, Abouali JAK, Conter HJ, Bhandari M. Overlapping systematic  
16 reviews of anterior cruciate ligament reconstruction comparing hamstring  
17 autograft with bone-patellar tendon-bone autograft: why are they different? *J*  
18 *Bone Joint Surg Am* [Internet]. 2007 Jul 1 [cited 2017 Nov 9];89(7):1542–52.  
19 Available from: <http://jbs.org/cgi/doi/10.2106/JBJS.F.01292>  
20  
21  
22  
23  
24 51. Spring B, Pagoto S, Knatterud G, Kozak A, Hedeker D. Examination of the analytic  
25 quality of behavioral health randomized clinical trials. *J Clin Psychol* [Internet].  
26 2007 Jan [cited 2017 Nov 9];63(1):53–71. Available from:  
27 <http://www.ncbi.nlm.nih.gov/pubmed/17115429>  
28  
29  
30  
31  
32 52. Agha R, Cooper D, Muir G. The reporting quality of randomised controlled trials  
33 in surgery: A systematic review. *Int J Surg* [Internet]. 2007 Dec [cited 2017 Nov  
34 9];5(6):413–22. Available from:  
35 <http://www.ncbi.nlm.nih.gov/pubmed/18029237>  
36  
37  
38  
39  
40 53. Kane RL, Wang J, Garrard J. Reporting in randomized clinical trials improved  
41 after adoption of the CONSORT statement. *J Clin Epidemiol* [Internet]. 2007 Mar  
42 [cited 2017 Nov 9];60(3):241–9. Available from:  
43 <http://linkinghub.elsevier.com/retrieve/pii/S0895435606002575>  
44  
45  
46  
47  
48 54. Paranjothy B, Shunmugam M, Azuara-Blanco A. The quality of reporting of  
49 diagnostic accuracy studies in glaucoma using scanning laser polarimetry. *J*  
50 *Glaucoma* [Internet]. 2007 Dec [cited 2017 Feb 24];16(8):670–5. Available from:  
51 <http://www.ncbi.nlm.nih.gov/pubmed/18091453>  
52  
53  
54  
55  
56 55. Johnson ZK, Siddiqui MAR, Azuara-Blanco A. The Quality of Reporting of  
57  
58  
59

- 1  
2  
3 Diagnostic Accuracy Studies of Optical Coherence Tomography in Glaucoma.  
4 Ophthalmology [Internet]. 2007 Sep [cited 2017 Feb 24];114(9):1607–12.  
5 Available from: <http://www.ncbi.nlm.nih.gov/pubmed/17434589>  
6  
7  
8  
9 56. Hind D, Booth A. Do health technology assessments comply with QUOROM  
10 diagram guidance? An empirical study. BMC Med Res Methodol [Internet]. 2007  
11 Nov 20 [cited 2017 Jul 17];7:49. Available from:  
12 <http://www.ncbi.nlm.nih.gov/pubmed/18021461>  
13  
14  
15  
16 57. Lee PE, Fischer HD, Rochon PA, Gill SS, Herrmann N, Bell CM, et al. Published  
17 randomized controlled trials of drug therapy for dementia often lack complete  
18 data on harm. J Clin Epidemiol [Internet]. 2008 Nov [cited 2017 Nov  
19 22];61(11):1152–60. Available from:  
20 <http://linkinghub.elsevier.com/retrieve/pii/S0895435607004829>  
21  
22  
23  
24  
25  
26 58. Pat K, Dooms C, Vansteenkiste J. Systematic review of symptom control and  
27 quality of life in studies on chemotherapy for advanced non-small cell lung  
28 cancer: How CONSORTed are the data? Lung Cancer [Internet]. 2008 Oct [cited  
29 2017 Mar 10];62(1):126–38. Available from:  
30 <http://linkinghub.elsevier.com/retrieve/pii/S0169500208001062>  
31  
32  
33  
34  
35  
36 59. Folkes A, Urquhart R, Grunfeld E. Are leading medical journals following their  
37 own policies on CONSORT reporting? Contemp Clin Trials [Internet]. 2008 Nov  
38 [cited 2017 Jun 26];29(6):843–6. Available from:  
39 <http://linkinghub.elsevier.com/retrieve/pii/S1551714408000906>  
40  
41  
42  
43  
44 60. Sinha S, Sinha S, Ashby E, Jayaram R, Grocott MPW. Quality of reporting in  
45 randomized trials published in high-quality surgical journals. J Am Coll Surg  
46 [Internet]. 2009 Nov [cited 2017 Jul 17];209(5):565–571.e1. Available from:  
47 <http://linkinghub.elsevier.com/retrieve/pii/S107275150901151X>  
48  
49  
50  
51 61. Freeman K, Szczepura A, Osipenko L. Non-invasive fetal RHD genotyping tests: a  
52 systematic review of the quality of reporting of diagnostic accuracy in published  
53 studies. Eur J Obstet Gynecol Reprod Biol [Internet]. 2009 Feb [cited 2017 Jun  
54  
55  
56  
57  
58  
59  
60

- 1  
2  
3 26];142(2):91–8. Available from:  
4 <http://linkinghub.elsevier.com/retrieve/pii/S0301211508003916>  
5  
6  
7 62. Uetani K, Nakayama T, Ikai H, Yonemoto N, Moher D. Quality of reports on  
8 randomized controlled trials conducted in Japan: Evaluation of adherence to the  
9 CONSORT statement. *Intern Med* [Internet]. 2009 [cited 2017 Feb  
10 24];48(5):307–13. Available from:  
11 <http://www.ncbi.nlm.nih.gov/pubmed/19252352>  
12  
13  
14 63. Ethgen M, Boutron L, Steg PG, Roy C, Ravaud P. Quality of reporting internal and  
15 external validity data from randomized controlled trials evaluating stents for  
16 percutaneous coronary intervention. *BMC Med Res Methodol* [Internet]. 2009  
17 Apr 9 [cited 2017 Feb 24];9(1):24. Available from:  
18 [http://www.embase.com/search/results?subaction=viewrecord&from=export&i](http://www.embase.com/search/results?subaction=viewrecord&from=export&id=L354667428)  
19 [d=L354667428](http://www.embase.com/search/results?subaction=viewrecord&from=export&id=L354667428)  
20  
21  
22 64. Krzych LJ, Liszka L. No improvement in studies reporting the diagnostic accuracy  
23 of B-type natriuretic peptide. *Med Sci Monit* [Internet]. 2009 May [cited 2017  
24 Nov 9];15(5):SR5-14. Available from:  
25 <http://www.ncbi.nlm.nih.gov/pubmed/19396053>  
26  
27  
28 65. Pagoto SL, Kozak AT, John P, Bodenlos JS, Hedeker D, Spring B, et al. Intention-  
29 to-treat analyses in behavioral medicine randomized clinical trials. *Int J Behav*  
30 *Med* [Internet]. 2009 Dec 25 [cited 2017 Feb 24];16(4):316–22. Available from:  
31 <http://link.springer.com/10.1007/s12529-009-9039-3>  
32  
33  
34 66. Han C, Kwak K, Marks DM, Pae C-U, Wu L-T, Bhatia KS, et al. The impact of the  
35 CONSORT statement on reporting of randomized clinical trials in psychiatry.  
36 *Contemp Clin Trials* [Internet]. 2009 Mar [cited 2017 Jun 26];30(2):116–22.  
37 Available from: <http://linkinghub.elsevier.com/retrieve/pii/S1551714408001511>  
38  
39  
40 67. Alvarez F, Meyer N, Gourraud PA, Paul C. CONSORT adoption and quality of  
41 reporting of randomized controlled trials: a systematic analysis in two  
42 dermatology journals. *Br J Dermatol* [Internet]. 2009 Nov [cited 2017 Feb  
43  
44  
45  
46  
47  
48  
49  
50  
51  
52  
53  
54  
55  
56  
57  
58  
59  
60

- 23];161(5):1159–65. Available from:  
<http://www.embase.com/search/results?subaction=viewrecord&from=export&id=L355782314>
68. Wei X, Tiejun L, Cheng W. Current situation on the reporting quality of randomized controlled trials in 5 leading Chinese medical journals. *J Med Coll PLA* [Internet]. 2009 Apr [cited 2018 Mar 12];24(2):105–11. Available from: <http://linkinghub.elsevier.com/retrieve/pii/S1000194809600253>
69. Ladd BO, McCrady BS, Manuel JK, Campbell W. Improving the quality of reporting alcohol outcome studies: Effects of the CONSORT statement. *Addict Behav* [Internet]. 2010 Jul [cited 2017 Feb 24];35(7):660–6. Available from: <http://linkinghub.elsevier.com/retrieve/pii/S0306460310000560>
70. Yu L-M, Chan A-W, Hopewell S, Deeks JJ, Altman DG. Reporting on covariate adjustment in randomised controlled trials before and after revision of the 2001 CONSORT statement: a literature review. *Trials* [Internet]. 2010 May 18 [cited 2017 Nov 9];11(1):59. Available from: <http://trialsjournal.biomedcentral.com/articles/10.1186/1745-6215-11-59>
71. Areia M, Soares M, Dinis-Ribeiro M. Quality reporting of endoscopic diagnostic studies in gastrointestinal journals: where do we stand on the use of the STARD and CONSORT statements? *Endoscopy* [Internet]. 2010 Feb 5 [cited 2017 Nov 9];42(2):138–47. Available from: <http://www.thieme-connect.de/DOI/DOI?10.1055/s-0029-1243846>
72. Delaney M, Meyer E, Cserti-Gazdewich C, Haspel RL, Lin Y, Morris A, et al. A systematic assessment of the quality of reporting for platelet transfusion studies. *Transfusion* [Internet]. 2010 Oct [cited 2017 Jun 26];50(10):2135–44. Available from: <http://doi.wiley.com/10.1111/j.1537-2995.2010.02691.x>
73. Flint HE, Harrison JE. How well do reports of clinical trials in the orthodontic literature comply with the CONSORT statement? *J Orthod* [Internet]. 2010 Dec 16 [cited 2017 Feb 24];37(4):250–61. Available from:

- 1  
2  
3 <http://www.tandfonline.com/doi/full/10.1179/14653121043191>  
4  
5  
6 74. Hopewell S, Dutton S, Yu L-M, Chan A-W, Altman DG. The quality of reports of  
7 randomised trials in 2000 and 2006: comparative study of articles indexed in  
8 PubMed. *BMJ* [Internet]. 2010 Mar 23 [cited 2017 Jun 26];340(mar23 1):c723.  
9 Available from:  
10 [http://www.embase.com/search/results?subaction=viewrecord&from=export&i](http://www.embase.com/search/results?subaction=viewrecord&from=export&id=L358557565)  
11 [d=L358557565](http://www.embase.com/search/results?subaction=viewrecord&from=export&id=L358557565)  
12  
13  
14  
15  
16 75. Ernst E, Hung SK CY. NCCAM-funded RCTs of herbal medicines: An independent,  
17 critical assessment. *Perfusion* [Internet]. 2011;24:89–102. Available from:  
18 [https://www.researchgate.net/publication/288438592\\_NCCAM-](https://www.researchgate.net/publication/288438592_NCCAM-fund)  
19 [funded\\_RCTs\\_of\\_herbal\\_medicines\\_An\\_independent\\_critical\\_assessment](https://www.researchgate.net/publication/288438592_NCCAM-fund)  
20  
21  
22  
23  
24 76. Selman TJ, Morris RK, Zamora J, Khan KS. The quality of reporting of primary test  
25 accuracy studies in obstetrics and gynaecology: application of the STARD  
26 criteria. *BMC Womens Health* [Internet]. 2011 Mar 23 [cited 2017 Jul  
27 17];11(1):8. Available from:  
28 <http://bmcwomenshealth.biomedcentral.com/articles/10.1186/1472-6874-11-8>  
29  
30  
31  
32  
33  
34 77. Parsons NR, Hiskens R, Price CL, Achten J, Costa ML. A systematic survey of the  
35 quality of research reporting in general orthopaedic journals. *J Bone Jt Surg - Ser*  
36 *B* [Internet]. 2011 Sep 1 [cited 2017 Feb 24];93 B(9):1154–9. Available from:  
37 <http://www.bjj.boneandjoint.org.uk/cgi/doi/10.1302/0301-620X.93B9.27193>  
38  
39  
40  
41  
42 78. Kiehna EN, Starke RM, Pouratian N, Dumont AS. Standards for reporting  
43 randomized controlled trials in neurosurgery. *J Neurosurg* [Internet]. 2011 Feb  
44 [cited 2017 Feb 24];114(2):280–5. Available from:  
45 <http://thejns.org/doi/10.3171/2010.8.JNS091770>  
46  
47  
48  
49  
50 79. Strech D, Soltmann B, Weikert B, Bauer M, Pfennig A. Quality of reporting of  
51 randomized controlled trials of pharmacologic treatment of bipolar disorders: A  
52 systematic review. *J Clin Psychiatry* [Internet]. 2011 Sep 15 [cited 2017 Feb  
53 24];72(9):1214–21. Available from:  
54  
55  
56  
57  
58  
59  
60



- 1  
2  
3 <http://article.psychiatrist.com/?ContentType=START&ID=10007267>  
4  
5  
6 80. Turner L-A, Singh K, Garritty C, Tsertsvadze A, Manheimer E, Wieland LS, et al.  
7 An evaluation of the completeness of safety reporting in reports of  
8 complementary and alternative medicine trials. *BMC Complement Altern Med*  
9 [Internet]. 2011 Aug 22 [cited 2017 Jun 26];11(1):67. Available from:  
10 [http://bmccomplementalalternmed.biomedcentral.com/articles/10.1186/1472-](http://bmccomplementalalternmed.biomedcentral.com/articles/10.1186/1472-6882-11-67)  
11 [6882-11-67](http://bmccomplementalalternmed.biomedcentral.com/articles/10.1186/1472-6882-11-67)  
12  
13  
14  
15  
16 81. Haidich A-B, Birtsoy C, Dardavessis T, Tirodimos I, Arvanitidou M. The quality of  
17 safety reporting in trials is still suboptimal: survey of major general medical  
18 journals. *J Clin Epidemiol* [Internet]. 2011 Feb [cited 2017 Feb 24];64(2):124–35.  
19 Available from: <http://linkinghub.elsevier.com/retrieve/pii/S0895435610001083>  
20  
21  
22  
23  
24 82. Gray R, Sullivan M, Altman DG, Gordon-Weeks AN. Adherence of trials of  
25 operative intervention to the CONSORT statement extension for  
26 nonpharmacological treatments: A comparative before and after study. *Ann R*  
27 *Coll Surg Engl* [Internet]. 2012 Sep 1 [cited 2017 Feb 24];94(6):388–94. Available  
28 from: [http://openurl.ingenta.com/content/xref?genre=article&issn=0035-](http://openurl.ingenta.com/content/xref?genre=article&issn=0035-8843&volume=94&issue=6&spage=388)  
29 [8843&volume=94&issue=6&spage=388](http://openurl.ingenta.com/content/xref?genre=article&issn=0035-8843&volume=94&issue=6&spage=388)  
30  
31  
32  
33  
34  
35 83. Cornelius VR, Sauzet O, Williams JE, Ayis S, Farquhar-Smith P, Ross JR, et al.  
36 Adverse event reporting in randomised controlled trials of neuropathic pain:  
37 considerations for future practice. *Pain* [Internet]. 2013 Feb [cited 2017 Nov  
38 22];154(2):213–20. Available from:  
39 [http://content.wkhealth.com/linkback/openurl?sid=WKPTLP:landingpage&an=0](http://content.wkhealth.com/linkback/openurl?sid=WKPTLP:landingpage&an=0006396-201302000-00009)  
40 [0006396-201302000-00009](http://content.wkhealth.com/linkback/openurl?sid=WKPTLP:landingpage&an=0006396-201302000-00009)  
41  
42  
43  
44  
45  
46 84. Diaz-Ordaz K, Froud R, Sheehan B, Eldridge S. A systematic review of cluster  
47 randomised trials in residential facilities for older people suggests how to  
48 improve quality. *BMC Med Res Methodol* [Internet]. 2013 Oct 22 [cited 2017 Jul  
49 17];13(1):127. Available from:  
50 [http://bmcmmedresmethodol.biomedcentral.com/articles/10.1186/1471-2288-](http://bmcmmedresmethodol.biomedcentral.com/articles/10.1186/1471-2288-13-127)  
51 [13-127](http://bmcmmedresmethodol.biomedcentral.com/articles/10.1186/1471-2288-13-127)  
52  
53  
54  
55  
56  
57  
58  
59  
60

- 1  
2  
3 85. Geha NN, Moseley AM, Elkins MR, Chiavegato LD, Shiwa SR, Costa LOP. The  
4 quality and reporting of randomized trials in cardiothoracic physical therapy  
5 could be substantially improved. *Respir Care* [Internet]. 2013 Nov;58(11):1899–  
6 906. Available from: <http://rc.rcjournal.com/cgi/doi/10.4187/respcare.02379>  
7  
8  
9  
10  
11 86. Liu LQ, Morris PJ, Pengel LHM. Compliance to the CONSORT statement of  
12 randomized controlled trials in solid organ transplantation: A 3-year overview.  
13 *Transpl Int* [Internet]. 2013 Mar [cited 2017 Feb 24];26(3):300–6. Available  
14 from:  
15 [http://www.embase.com/search/results?subaction=viewrecord&from=export&i](http://www.embase.com/search/results?subaction=viewrecord&from=export&id=L52379666)  
16 [d=L52379666](http://www.embase.com/search/results?subaction=viewrecord&from=export&id=L52379666)  
17  
18  
19  
20  
21  
22 87. Panic N, Leoncini E, de Belvis G, Ricciardi W, Boccia S. Evaluation of the  
23 endorsement of the preferred reporting items for systematic reviews and meta-  
24 analysis (PRISMA) statement on the quality of published systematic review and  
25 meta-analyses. Derrick GE, editor. *PLoS One* [Internet]. 2013 Dec 26 [cited 2017  
26 Jan 15];8(12):e83138. Available from:  
27 [http://www.embase.com/search/results?subaction=viewrecord&from=export&i](http://www.embase.com/search/results?subaction=viewrecord&from=export&id=L372005920)  
28 [d=L372005920](http://www.embase.com/search/results?subaction=viewrecord&from=export&id=L372005920)  
29  
30  
31  
32  
33  
34  
35 88. Fleming PS, Seehra J, Polychronopoulou A, Fedorowicz Z, Pandis N. A PRISMA  
36 assessment of the reporting quality of systematic reviews in orthodontics. *Angle*  
37 *Orthod* [Internet]. 2013 Jan [cited 2017 Nov 9];83(1):158–63. Available from:  
38 <http://www.ncbi.nlm.nih.gov/pubmed/22720835>  
39  
40  
41  
42  
43 89. Péron J, Maillet D, Gan HK, Chen EX, You B. Adherence to CONSORT adverse  
44 event reporting guidelines in randomized clinical trials evaluating systemic  
45 cancer therapy: A systematic review. *J Clin Oncol* [Internet]. 2013 Nov 1 [cited  
46 2017 Feb 24];31(31):3957–63. Available from:  
47 <http://ascopubs.org/doi/10.1200/JCO.2013.49.3981>  
48  
49  
50  
51  
52 90. Tunis AS, McInnes MDF, Hanna R, Esmail K. Association of Study Quality with  
53 Completeness of Reporting: Have Completeness of Reporting and Quality of  
54 Systematic Reviews and Meta-Analyses in Major Radiology Journals Changed  
55  
56  
57  
58  
59  
60

- 1  
2  
3 Since Publication of the PRISMA Statement? Radiology [Internet]. 2013 Nov  
4 [cited 2018 Mar 12];269(2):413–26. Available from:  
5  
6 <http://pubs.rsna.org/doi/10.1148/radiol.13130273>  
7  
8
- 9 91. Maclean EN, Stone IS, Ceelen F, Garcia-Albeniz X, Sommer WH, Petersen SE.  
10 Quality of reporting in cardiac MRI, CT and SPECT diagnostic accuracy studies:  
11 Analysis of the impact of STARD criteria. J Cardiovasc Magn Reson [Internet].  
12 2013 Jun 1 [cited 2017 Feb 24];15(6):61. Available from:  
13  
14 <http://www.embase.com/search/results?subaction=viewrecord&from=export&i>  
15 [d=L70993941](http://www.embase.com/search/results?subaction=viewrecord&from=export&i)  
16  
17  
18
- 19 92. Baker D, Lidster K, Sottomayor A, Amor S. Two Years Later: Journals Are Not Yet  
20 Enforcing the ARRIVE Guidelines on Reporting Standards for Pre-Clinical Animal  
21 Studies. Eisen JA, editor. PLoS Biol [Internet]. 2014 Jan 7 [cited 2017 Sep  
22 29];12(1):e1001756. Available from:  
23  
24 <http://www.ncbi.nlm.nih.gov/pubmed/24409096>  
25  
26  
27  
28
- 29 93. Choi J, Jun JH, Kang BK, Kim KH, Lee MS. Endorsement for improving the quality  
30 of reports on randomized controlled trials of traditional medicine journals in  
31 Korea: a systematic review. Trials [Internet]. 2014 Nov 5 [cited 2017 Jan  
32 15];15(1):429. Available from:  
33  
34 <http://trialsjournal.biomedcentral.com/articles/10.1186/1745-6215-15-429>  
35  
36  
37  
38
- 39 94. Walther S, Schueler S, Tackmann R, Schuetz GM, Schlattmann P, Dewey M, et al.  
40 Compliance with STARD checklist among studies of coronary CT angiography:  
41 systematic review. Radiology [Internet]. 2014 Apr [cited 2017 Feb  
42 23];271(1):74–86. Available from:  
43  
44 <http://pubs.rsna.org/doi/10.1148/radiol.13121720>  
45  
46  
47  
48
- 49 95. Ghimire S, Kyung E, Lee H, Kim E. Oncology trial abstracts showed suboptimal  
50 improvement in reporting: a comparative before-and-after evaluation using  
51 CONSORT for Abstract guidelines. J Clin Epidemiol [Internet]. 2014 Jun [cited  
52 2017 Feb 24];67(6):658–66. Available from:  
53  
54 <http://linkinghub.elsevier.com/retrieve/pii/S0895435613004435>  
55  
56  
57  
58  
59

- 1  
2  
3 96. Song T-J, Leng H-F, Zhong LL, Wu T-X, Bian Z-X. CONSORT in China: past  
4 development and future direction. *Trials* [Internet]. 2015 Jun 1 [cited 2017 Jun  
5 26];16(1):243. Available from:  
6 <http://trialsjournal.biomedcentral.com/articles/10.1186/s13063-015-0769-z>  
7  
8  
9  
10 97. Stevely A, Dimairo M, Todd S, Julious SA, Nicholl J, Hind D, et al. An Investigation  
11 of the Shortcomings of the CONSORT 2010 Statement for the Reporting of  
12 Group Sequential Randomised Controlled Trials: A Methodological Systematic  
13 Review. Shamji M, editor. *PLoS One* [Internet]. 2015 Nov 3 [cited 2017 Feb  
14 24];10(11):e0141104. Available from:  
15 <http://dx.plos.org/10.1371/journal.pone.0141104>  
16  
17  
18  
19 98. Adie S, Ma D, Harris IA, Naylor JM, Craig JC. Quality of conduct and reporting of  
20 meta-analyses of surgical interventions. *Ann Surg* [Internet]. 2015 Apr [cited  
21 2017 Jun 26];261(4):685–94. Available from:  
22 [http://content.wkhealth.com/linkback/openurl?sid=WKPTLP:landingpage%7B&  
23 %7Dan=00000658-201504000-00012](http://content.wkhealth.com/linkback/openurl?sid=WKPTLP:landingpage%7B&%7Dan=00000658-201504000-00012)  
24  
25  
26  
27  
28  
29 99. Jull A, Aye PS. Endorsement of the CONSORT guidelines, trial registration, and  
30 the quality of reporting randomised controlled trials in leading nursing journals:  
31 A cross-sectional analysis. *Int J Nurs Stud* [Internet]. 2015 Jun [cited 2017 Feb  
32 10];52(6):1071–9. Available from:  
33 <http://linkinghub.elsevier.com/retrieve/pii/S0020748914003022>  
34  
35  
36  
37  
38  
39 100. Bearn DR, Alharbi F. Reporting of clinical trials in the orthodontic literature from  
40 2008 to 2012: observational study of published reports in four major journals. *J*  
41 *Orthod* [Internet]. 2015 Sep 15 [cited 2017 Feb 24];42(3):186–91. Available  
42 from: <http://www.tandfonline.com/doi/full/10.1179/1465313315Y.0000000011>  
43  
44  
45  
46  
47  
48 101. Agha RA, Fowler AJ, Limb C, Whitehurst K, Coe R, Sagoo H, et al. Impact of the  
49 mandatory implementation of reporting guidelines on reporting quality in a  
50 surgical journal: A before and after study. *Int J Surg* [Internet]. 2016 Jun [cited  
51 2017 Feb 20];30:169–72. Available from:  
52 <http://linkinghub.elsevier.com/retrieve/pii/S1743919116300620>  
53  
54  
55  
56  
57  
58  
59  
60

- 1  
2  
3 102. Pouwels KB, Widyakusuma NN, Groenwold RHH, Hak E. Quality of reporting of  
4 confounding remained suboptimal after the STROBE guideline. *J Clin Epidemiol*  
5 [Internet]. 2016 Jan [cited 2017 Feb 24];69:217–24. Available from:  
6 <http://linkinghub.elsevier.com/retrieve/pii/S0895435615003856>  
7  
8  
9  
10 103. Rao A, Brück K, Methven S, Evans R, Stel VS, Jager KJ, et al. Quality of reporting  
11 and study design of CKD cohort studies assessing mortality in the elderly before  
12 and after STROBE: A systematic review. Zhou X, editor. *PLoS One* [Internet].  
13 2016 May 11 [cited 2017 Jun 26];11(5):e0155078. Available from:  
14 <http://dx.plos.org/10.1371/journal.pone.0155078>  
15  
16  
17  
18 104. Grob ATM, van der Vaart LR, Withagen MIJ, van der Vaart CH. The quality of  
19 reporting of diagnostic accuracy studies in pelvic floor transperineal three-  
20 dimensional ultrasound: a systematic review. *Ultrasound Obstet Gynecol*  
21 [Internet]. 2016 Dec 21 [cited 2017 Mar 10]; Available from:  
22 <http://doi.wiley.com/10.1002/uog.17390>  
23  
24  
25  
26 105. Rikos D, Dardiotis E, Tsivgoulis G, Zintzaras E, Hadjigeorgiou GM. Reporting  
27 quality of randomized-controlled trials in multiple sclerosis from 2000 to 2015,  
28 based on CONSORT statement. *Mult Scler Relat Disord* [Internet]. 2016 Sep  
29 [cited 2017 Feb 24];9:135–9. Available from:  
30 <http://linkinghub.elsevier.com/retrieve/pii/S2211034816301225>  
31  
32  
33  
34 106. Bigna JJR, Um LN, Nansseu JRN. A comparison of quality of abstracts of  
35 systematic reviews including meta-analysis of randomized controlled trials in  
36 high-impact general medicine journals before and after the publication of  
37 PRISMA extension for abstracts: A systematic review and m. *Syst Rev* [Internet].  
38 2016 Oct 13 [cited 2017 Jun 26];5(1):174. Available from:  
39 <http://www.embase.com/search/results?subaction=viewrecord&from=export&id=L612833923>  
40  
41  
42  
43  
44  
45  
46  
47  
48  
49  
50  
51  
52 107. Sarkis-Onofre R, Poletto-Neto V, Cenci MS, Pereira-Cenci T, Moher D. Impact of  
53 the CONSORT Statement endorsement in the completeness of reporting of  
54 randomized clinical trials in restorative dentistry. *J Dent* [Internet]. 2017 Mar 31  
55  
56  
57  
58  
59  
60

- 1  
2  
3 [cited 2017 Feb 24];58:54–9. Available from:  
4 <http://linkinghub.elsevier.com/retrieve/pii/S0300571217300283>  
5  
6  
7 108. Tharyan P, Premkumar TS, Mathew V, Barnabas JP, Manuelraj. Editorial policy  
8 and the reporting of randomized controlled trials: a survey of instructions for  
9 authors and assessment of trial reports in Indian medical journals (2004-05).  
10 Natl Med J India [Internet]. [cited 2017 Nov 9];21(2):62–8. Available from:  
11 <http://www.ncbi.nlm.nih.gov/pubmed/18807310>  
12  
13  
14  
15  
16 109. Lai TYY, Wong VWY, Lam RF, Cheng ACO, Lam DSC, Leung GM. Quality of  
17 reporting of key methodological items of randomized controlled trials in clinical  
18 ophthalmic journals. *Ophthalmic Epidemiol* [Internet]. 14(6):390–8. Available  
19 from: <http://www.ncbi.nlm.nih.gov/pubmed/18161613>  
20  
21  
22  
23  
24 110. Jilka RL. The Road to Reproducibility in Animal Research. *J Bone Miner Res*  
25 [Internet]. 2016 Jul [cited 2017 Jul 21];31(7):1317–9. Available from:  
26 <http://doi.wiley.com/10.1002/jbmr.2881>  
27  
28  
29  
30 111. Moher D, Altman DG, Roberts I, Dirnagl U, Chalmers I, Berlin J. Four Proposals to  
31 Help Improve the Medical Research Literature. *PLOS Med* [Internet]. 2015 Sep  
32 22 [cited 2017 Aug 29];12(9):e1001864. Available from:  
33 <http://dx.plos.org/10.1371/journal.pmed.1001864>  
34  
35  
36  
37  
38 112. Hutton B, Salanti G, Caldwell DM, Chaimani A, Schmid CH, Cameron C, et al. The  
39 PRISMA extension statement for reporting of systematic reviews incorporating  
40 network meta-analyses of health care interventions: checklist and explanations.  
41 *Ann Intern Med* [Internet]. 2015 Jun 2 [cited 2017 Jun 26];162(11):777–84.  
42 Available from: <http://annals.org/article.aspx?doi=10.7326/M14-2385>  
43  
44  
45  
46  
47 113. Cobo E, Selva-O'Callaghan A, Ribera JM, Cardellach F, Dominguez R, Vilardell M.  
48 Statistical reviewers improve reporting in biomedical articles: A randomized  
49 trial. *PLoS One*. 2007;2(3).  
50  
51  
52  
53 114. Hirst A, Altman DG. Are peer reviewers encouraged to use reporting guidelines?  
54 A survey of 116 health research journals. Cameron DW, editor. *PLoS One*  
55  
56  
57  
58  
59  
60

- 1  
2  
3 [Internet]. 2012 Apr 27 [cited 2017 Jun 7];7(4):e35621. Available from:  
4 <http://dx.plos.org/10.1371/journal.pone.0035621>  
5  
6
- 7 115. Pandis N, Shamseer L, Kokich VG, Fleming PS, Moher D. Active implementation  
8 strategy of CONSORT adherence by a dental specialty journal improved  
9 randomized clinical trial reporting. *J Clin Epidemiol* [Internet]. 2014 Sep [cited  
10 2017 Jan 15];67(9):1044–8. Available from:  
11 <http://linkinghub.elsevier.com/retrieve/pii/S0895435614001140>  
12  
13
- 14 116. Cobo E, Cortes J, Ribera JM, Cardellach F, Selva-O’Callaghan A, Kostov B, et al.  
15 Effect of using reporting guidelines during peer review on quality of final  
16 manuscripts submitted to a biomedical journal: masked randomised trial. 2011  
17 Nov;343(nov22 2). Available from:  
18 <http://www.ncbi.nlm.nih.gov/pubmed/22108262>  
19  
20
- 21 117. Hopewell S, Collins GS, Boutron I, Yu L-M, Cook J, Shanyinde M, et al. Impact of  
22 peer review on reports of randomised trials published in open peer review  
23 journals: retrospective before and after study. *BMJ* [Internet]. 2014 [cited 2017  
24 Jun 7];349. Available from: <http://www.bmj.com/content/349/bmj.g4145>  
25  
26
- 27 118. Statreviewer. Available from: <http://www.statreviewer.com/>  
28  
29
- 30 119. A peerless review? Automating methodological and statistical review. Available  
31 from: [https://blogs.biomedcentral.com/bmcblog/2016/05/23/peerless-review-  
32 automating-methodological-statistical-review/](https://blogs.biomedcentral.com/bmcblog/2016/05/23/peerless-review-automating-methodological-statistical-review/)  
33  
34
- 35 120. Tools and templates for implementing reporting guidelines. Available from:  
36 [http://www.equator-network.org/toolkits/using-guidelines-in-journals/tools-  
37 and-templates-for-implementing-reporting-guidelines/](http://www.equator-network.org/toolkits/using-guidelines-in-journals/tools-and-templates-for-implementing-reporting-guidelines/)  
38  
39
- 40 121. Hopewell S, Boutron I, Altman DG, Barbour G, Moher D, Montori V, et al. Impact  
41 of a web-based tool (WebCONSORT) to improve the reporting of randomised  
42 trials: results of a randomised controlled trial. *BMC Med* [Internet]. 2016 Nov 28  
43 [cited 2017 Feb 24];14(1):199. Available from:  
44 <http://www.ncbi.nlm.nih.gov/pubmed/27894295>  
45  
46  
47  
48  
49  
50  
51  
52  
53  
54  
55  
56  
57  
58  
59

- 1  
2  
3 122. Mbuagbaw L, Thabane M, Vanniyasingam T, Borg Debono V, Kosa S, Zhang S, et  
4 al. Improvement in the quality of abstracts in major clinical journals since  
5 CONSORT extension for abstracts: a systematic review. *Contemp Clin Trials*  
6 [Internet]. 2014 Jul [cited 2017 Feb 24];38(2):245–50. Available from:  
7 <http://linkinghub.elsevier.com/retrieve/pii/S1551714414000809>  
8  
9  
10  
11  
12 123. PubPeer. Available from: <https://pubpeer.com/>  
13  
14  
15 124. ScienceOpen. Available from: <https://www.scienceopen.com/>  
16  
17  
18 125. Schriger DL, Altman DG. Inadequate post-publication review of medical  
19 research. *BMJ* [Internet]. 2010 Aug 11 [cited 2018 Mar 4];341:c3803. Available  
20 from: <http://www.ncbi.nlm.nih.gov/pubmed/20702543>  
21  
22  
23  
24 126. Pandis N, Polychronopoulou A, Eliades T. An assessment of quality  
25 characteristics of randomised control trials published in dental journals. *J Dent*  
26 [Internet]. 2010 Sep [cited 2017 Feb 24];38(9):713–21. Available from:  
27 <http://linkinghub.elsevier.com/retrieve/pii/S0300571210001235>  
28  
29  
30  
31 127. Péron J, You B, Gan HK, Maillet D, Chen EX, Pond GR, et al. Influence of  
32 statistician involvement on reporting of randomized clinical trials in medical  
33 oncology. *Anticancer Drugs* [Internet]. 2013 Mar [cited 2017 Feb 24];24(3):306–  
34 9. Available from:  
35 [http://content.wkhealth.com/linkback/openurl?sid=WKPTLP:landingpage&an=0](http://content.wkhealth.com/linkback/openurl?sid=WKPTLP:landingpage&an=0001813-201303000-00010)  
36 [0001813-201303000-00010](http://content.wkhealth.com/linkback/openurl?sid=WKPTLP:landingpage&an=0001813-201303000-00010)  
37  
38  
39  
40  
41  
42  
43 128. Kloukos D, Papageorgiou SN, Doulis I, Petridis H, Pandis N. Reporting quality of  
44 randomised controlled trials published in prosthodontic and implantology  
45 journals. *J Oral Rehabil* [Internet]. 2015 Dec [cited 2017 Feb 24];42(12):914–25.  
46 Available from: <http://doi.wiley.com/10.1111/joor.12325>  
47  
48  
49  
50  
51 129. Blanco D, Biggane AM, Cobo E. Are CONSORT checklists submitted by authors  
52 adequately reflecting what information is actually reported in published papers?  
53 *Trials* [Internet]. 2018 Dec 29 [cited 2018 Jan 31];19(1):80. Available from:  
54 <https://trialsjournal.biomedcentral.com/articles/10.1186/s13063-018-2475-0>  
55  
56  
57  
58  
59  
60



- 1  
2  
3 130. Koletsi D, Fleming PS, Behrents RG, Lynch CD, Pandis N. The use of tailored  
4 subheadings was successful in enhancing compliance with CONSORT in a dental  
5 journal. *J Dent* [Internet]. 2017 Dec [cited 2018 Mar 23];67:66–71. Available  
6 from: <http://www.ncbi.nlm.nih.gov/pubmed/28941813>  
7  
8  
9  
10  
11 131. Cobo E, González JA. Taking advantage of unexpected WebCONSORT results.  
12 *BMC Med* [Internet]. 2016 Dec 5 [cited 2018 Feb 16];14(1):204. Available from:  
13 <http://bmcmmedicine.biomedcentral.com/articles/10.1186/s12916-016-0758-4>  
14  
15  
16  
17 132. Tjldink JK, Schipper K, Bouter LM, Maclaine Pont P, de Jonge J, Smulders YM.  
18 How do scientists perceive the current publication culture? A qualitative focus  
19 group interview study among Dutch biomedical researchers. *BMJ Open*  
20 [Internet]. 2016 Feb 17 [cited 2017 Sep 28];6(2):e008681. Available from:  
21 <http://bmjopen.bmj.com/lookup/doi/10.1136/bmjopen-2015-008681>  
22  
23  
24  
25  
26  
27  
28

## 29 **Figures, tables and supplementary files**

30  
31  
32 **Figure 1:** PRISMA flow diagram  
33

34 **Figure 2:** Typology of interventions to improve adherence to RGs according to type of  
35 intervention and research stage. **Legend:** Evaluated interventions are shown in bold.  
36  
37

38 **Figure 3:** Gaps in research on the evaluation of interventions to improve adherence to  
39 reporting guidelines. **Legend:** Each circle represents one intervention. Variables displayed: 1)  
40 Circle size: Number of studies evaluating each intervention (bigger = more studies); 2) Circle  
41 colour: Study design of those studies (blue for RCTs and green for observational studies) and 3)  
42 Circle fill: Kind of RG implementation (plain for checklist and stripes for bullet points and  
43 examples). Research gaps are highlighted in red.  
44  
45  
46  
47  
48

49 **Table 1:** Rationale of the interventions identified.  
50

51 **Supplementary file 1:** Description of the acronyms and full names of the reporting guidelines  
52 shown in the EQUATOR website as “Reporting Guidelines for main study types” on 8 May  
53 2017.  
54  
55  
56  
57  
58  
59  
60

1  
2  
3 **Supplementary file 2:** Search terms for PubMed (from January 1, 1996, to March 31, 2017) via  
4 PubMed.  
5

6  
7 **Supplementary file 3:** implementation details of the evaluated interventions.  
8  
9  
10  
11  
12  
13  
14  
15  
16  
17  
18  
19  
20  
21  
22  
23  
24  
25  
26  
27  
28  
29  
30  
31  
32  
33  
34  
35  
36  
37  
38  
39  
40  
41  
42  
43  
44  
45  
46  
47  
48  
49  
50  
51  
52  
53  
54  
55  
56  
57  
58  
59  
60

For peer review only

1  
2  
3  
4  
5  
6  
7  
8  
9  
10  
11  
12  
13  
14  
15  
16  
17  
18  
19  
20  
21  
22  
23  
24  
25  
26  
27  
28  
29  
30  
31  
32  
33  
34  
35  
36  
37  
38  
39  
40  
41  
42  
43  
44  
45  
46  
47

| Group                         | Intervention                                                                  | Rationale                                                                                       |
|-------------------------------|-------------------------------------------------------------------------------|-------------------------------------------------------------------------------------------------|
| <b>Training</b>               | Introduction of RGs & journalology into graduate curricula (17-21)            | To introduce good research reporting habits early in young researchers' scientific careers.     |
|                               | Student's development of protocols for coursework and research using RGs (20) |                                                                                                 |
|                               | Funder's support of author training on RGs (1)                                | Authors, editors, and peer reviewers have insufficient training in issues related to reporting. |
|                               | Training for peer reviewers and editors on RGs by journals (1,21)             |                                                                                                 |
| <b>Improved understanding</b> | Translation of RGs to further languages (22)                                  | Language barriers may affect the proper use of RGs.                                             |
|                               | Development of expanded database of examples for each RG (23)                 | Authors need more examples of good reporting to properly understand certain items.              |
| <b>Encouraging adherence</b>  | Dissemination of RGs by scientific associations (24)                          | A large number of researchers are not aware of the existence of RGs.                            |
|                               | Author use of RGs as a template for grant application proposals (20)          | Using RGs in early stages may facilitate completeness of reporting of published research.       |
|                               | Required checklist for ethics approval application (11)                       |                                                                                                 |
|                               | Funder's requirement of checklists in author's report (20,25)                 |                                                                                                 |

only

1  
2  
3  
4  
5  
6  
7  
8  
9  
10  
11  
12  
13  
14  
15  
16  
17  
18  
19  
20  
21  
22  
23  
24  
25  
26  
27  
28  
29  
30  
31  
32  
33  
34  
35  
36  
37  
38  
39  
40  
41  
42  
43  
44  
45  
46  
47

|                                                                                                                                      |                                                                                                                                                                                                                                |
|--------------------------------------------------------------------------------------------------------------------------------------|--------------------------------------------------------------------------------------------------------------------------------------------------------------------------------------------------------------------------------|
| <p>Author use of the writing aid tool COBWEB (12)</p>                                                                                | <p>A) Authors need help to successfully adhere to RGs at the writing stage and B) Dividing RG items into bullet points and providing examples might help.</p>                                                                  |
| <p>Author use of a structured approach for reporting research (27)</p>                                                               | <p>A) To help authors avoid omissions, B) to aid reviewers and editors in appraising articles and C) to allow more efficient data extraction during the systematic review process.</p>                                         |
| <p>Author markup of the manuscript to indicate where each RG item is addressed (29)</p>                                              |                                                                                                                                                                                                                                |
| <p>Editorial statement endorsing certain RGs (30-109)</p>                                                                            | <p>Authors read editorial statements and follow "Instructions to authors".</p>                                                                                                                                                 |
| <p>Recommendation or requirement to follow RGs in the "Instructions to authors" (30-109)</p>                                         |                                                                                                                                                                                                                                |
| <p>Requirement to submit a RG checklist together with the manuscript indicating page numbers corresponding to each item (30-109)</p> | <p>Authors may not consider editorial statements or recommendations in "Instructions to authors" to be important. Compulsory submission of checklists or text mark-up may encourage authors to be more compliant with RGs.</p> |
| <p>Requirement to populate and submit a RG checklist with text from the manuscript (112)</p>                                         |                                                                                                                                                                                                                                |

only

1  
2  
3  
4  
5  
6  
7  
8  
9  
10  
11  
12  
13  
14  
15  
16  
17  
18  
19  
20  
21  
22  
23  
24  
25  
26  
27  
28  
29  
30  
31  
32  
33  
34  
35  
36  
37  
38  
39  
40  
41  
42  
43  
44  
45  
46  
47

|                                                    |                                                                                        |                                                                                                                                                            |
|----------------------------------------------------|----------------------------------------------------------------------------------------|------------------------------------------------------------------------------------------------------------------------------------------------------------|
|                                                    | Journal development of core versions of RGs containing key items (110)                 | Focusing on the most important items could be more effective than considering the whole checklist.                                                         |
|                                                    | Guidance to authors on manuscript preparation by publication officers (111)            | Trained journal officers may enhance authors' compliance with RGs during manuscript preparation.                                                           |
|                                                    | Suggestion for peer reviewers to use RGs (113)                                         | Peer reviewers often do not detect reporting flaws. Therefore, they may need to follow a more systematic approach and use RGs.                             |
|                                                    | Editor's questions to peer reviewers about whether the authors have followed RGs (114) |                                                                                                                                                            |
| <b>Monitoring adherence and providing feedback</b> | Completeness of reporting check by editors (115)                                       | Requiring checklists at submission does not guarantee adherence. Editors and peer reviewers have to check whether submitted papers are compliant with RGs. |
|                                                    | Peer review against RGs (116)                                                          |                                                                                                                                                            |
|                                                    | Internal peer review against RGs by a trained editorial assistant (117)                | It is extremely unlikely that the average clinical peer reviewer has the methodological expertise to check a paper against RGs.                            |
|                                                    | Implementation of the automatic tool Statreviewer (119)                                |                                                                                                                                                            |
|                                                    | Email to authors to revise the manuscript according to RGs (13)                        |                                                                                                                                                            |

only

1  
2  
3  
4  
5  
6  
7  
8  
9  
10  
11  
12  
13  
14  
15  
16  
17  
18  
19  
20  
21  
22  
23  
24  
25  
26  
27  
28  
29  
30  
31  
32  
33  
34  
35  
36  
37  
38  
39  
40  
41  
42  
43  
44  
45  
46  
47

|                                                |                                                       |                                                                                                                         |
|------------------------------------------------|-------------------------------------------------------|-------------------------------------------------------------------------------------------------------------------------|
|                                                | Implementation of the tool WebCONSORT (121)           | because they will do anything to get their paper published.                                                             |
|                                                | Completeness of reporting check at copy-editing (122) | Copy-editing and post-publication offer alternate time points to improve adherence to RGs.                              |
|                                                | Post- publication peer review (125)                   |                                                                                                                         |
| <b>Collaboration among authors and experts</b> | Statistician involvement (84,126-128)                 | Professionals with specific knowledge of RGs might help authors when designing, conducting or reporting their research. |
|                                                | Medical writer involvement (25)                       |                                                                                                                         |

er review only

1  
2  
3  
4  
5  
6  
7  
8  
9  
10  
11  
12  
13  
14  
15  
16  
17  
18  
19  
20  
21  
22  
23  
24  
25  
26  
27  
28  
29  
30  
31  
32  
33  
34  
35  
36  
37  
38  
39  
40  
41  
42  
43  
44  
45  
46  
47  
48  
49  
50  
51  
52  
53  
54  
55  
56  
57  
58  
59  
60

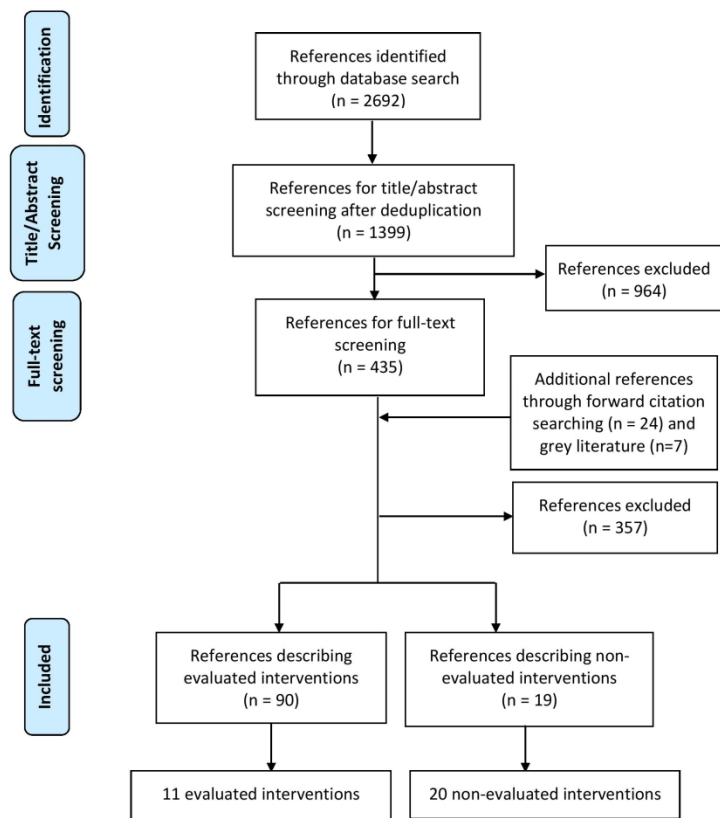

215x279mm (300 x 300 DPI)

1  
2  
3  
4  
5  
6  
7  
8  
9  
10  
11  
12  
13  
14  
15  
16  
17  
18  
19  
20  
21  
22  
23  
24  
25  
26  
27  
28  
29  
30  
31  
32  
33  
34  
35  
36  
37  
38  
39  
40  
41  
42  
43  
44  
45  
46  
47  
48  
49  
50  
51  
52  
53  
54  
55  
56  
57  
58  
59  
60

|                      |                                             |                                                                                                                                  |                                                                        |                                                                          |                                                                                                                                                                                                                                                                            |                                                                                                                                                                                                                                                        |                                                                                                                                                                                                                                                                              |                                                                                                                                              |                                                       |                                    |  |
|----------------------|---------------------------------------------|----------------------------------------------------------------------------------------------------------------------------------|------------------------------------------------------------------------|--------------------------------------------------------------------------|----------------------------------------------------------------------------------------------------------------------------------------------------------------------------------------------------------------------------------------------------------------------------|--------------------------------------------------------------------------------------------------------------------------------------------------------------------------------------------------------------------------------------------------------|------------------------------------------------------------------------------------------------------------------------------------------------------------------------------------------------------------------------------------------------------------------------------|----------------------------------------------------------------------------------------------------------------------------------------------|-------------------------------------------------------|------------------------------------|--|
| TYPE OF INTERVENTION | TRAINING                                    | Introduction of RGs & journalology into graduate curricula (17-21)<br>Student's development of research protocols using RGs (20) |                                                                        | Funder's support of author training on RGs (1)                           |                                                                                                                                                                                                                                                                            |                                                                                                                                                                                                                                                        | Training for peer reviewers and editors on RGs by journals (1,21)                                                                                                                                                                                                            |                                                                                                                                              |                                                       |                                    |  |
|                      | Improved UNDERSTANDING                      | Translation of RGs to further languages (22)<br>Development of expanded databases of examples for each RG (23)                   |                                                                        |                                                                          |                                                                                                                                                                                                                                                                            |                                                                                                                                                                                                                                                        |                                                                                                                                                                                                                                                                              |                                                                                                                                              |                                                       |                                    |  |
|                      | ENCOURAGING adherence                       | Dissemination of RGs by scientific associations (24)                                                                             | Author use of RGs as a template for grant applications' proposals (20) | Required checklist for ethics approval application (11)                  | Author use of the writing aid tool COBWEB (12)<br><br>Author use of a structured approach for reporting research (27)<br>Author markup of the manuscript to indicate where each RG item is addressed (29)<br>Funder's requirement of checklists in author's report (20,25) | Journal development of core versions of RGs containing key items (110)<br><br>Guidance to authors on manuscript preparation by publication officers (111)<br><br>Requirement to populate and submit a RG checklist with text from the manuscript (112) | Editorial statement endorsing certain RGs (30-109)<br>Recommendation or requirement to follow RGs in the "Instructions to authors" (30-109)<br>Requirement to submit a RG checklist together with the manuscript indicating page numbers corresponding to each item (30-109) | Suggestion for peer reviewers to use RGs (113)<br><br>Editor's questions to peer reviewers about whether the authors have followed RGs (114) |                                                       |                                    |  |
|                      | MONITORING adherence and providing FEEDBACK |                                                                                                                                  |                                                                        |                                                                          |                                                                                                                                                                                                                                                                            |                                                                                                                                                                                                                                                        | Completeness of reporting check by editors (115)<br>Peer review against RGs (116)<br>Internal peer review against RGs by a trained editorial assistant (117)<br>Implementation of the automatic tool StatReviewer (119)                                                      | Email to authors to revise the manuscript according to RGs (13)<br><br>Implementation of the web tool WebCONSORT (121)                       | Completeness of reporting check at copy-editing (122) | Post-publication peer review (125) |  |
|                      | COLLABORATION among authors and experts     |                                                                                                                                  |                                                                        | Medical writer involvement (25)<br>Statistician involvement (84,126-128) |                                                                                                                                                                                                                                                                            |                                                                                                                                                                                                                                                        |                                                                                                                                                                                                                                                                              |                                                                                                                                              |                                                       |                                    |  |
|                      |                                             | EDUCATION                                                                                                                        | GRANT WRITING                                                          | PROTOCOL WRITING                                                         | MANUSCRIPT WRITING                                                                                                                                                                                                                                                         | MANUSCRIPT SUBMISSION                                                                                                                                                                                                                                  | JOURNAL PEER REVIEW                                                                                                                                                                                                                                                          | AUTHOR REVISION                                                                                                                              | COPY-EDITING                                          | POST-PUBLICATION                   |  |
|                      |                                             | BEFORE STUDY CONDUCT                                                                                                             |                                                                        |                                                                          |                                                                                                                                                                                                                                                                            | AFTER STUDY CONDUCT                                                                                                                                                                                                                                    |                                                                                                                                                                                                                                                                              |                                                                                                                                              |                                                       |                                    |  |
|                      |                                             | RESEARCH STAGE                                                                                                                   |                                                                        |                                                                          |                                                                                                                                                                                                                                                                            |                                                                                                                                                                                                                                                        |                                                                                                                                                                                                                                                                              |                                                                                                                                              |                                                       |                                    |  |

670x379mm (300 x 300 DPI)



1  
2  
3  
4  
5  
6  
7  
8  
9  
10  
11  
12  
13  
14  
15  
16  
17  
18  
19  
20  
21  
22  
23  
24  
25  
26  
27  
28  
29  
30  
31  
32  
33  
34  
35  
36  
37  
38  
39  
40  
41  
42  
43  
44  
45  
46  
47  
48  
49  
50  
51  
52  
53  
54  
55  
56  
57  
58  
59  
60

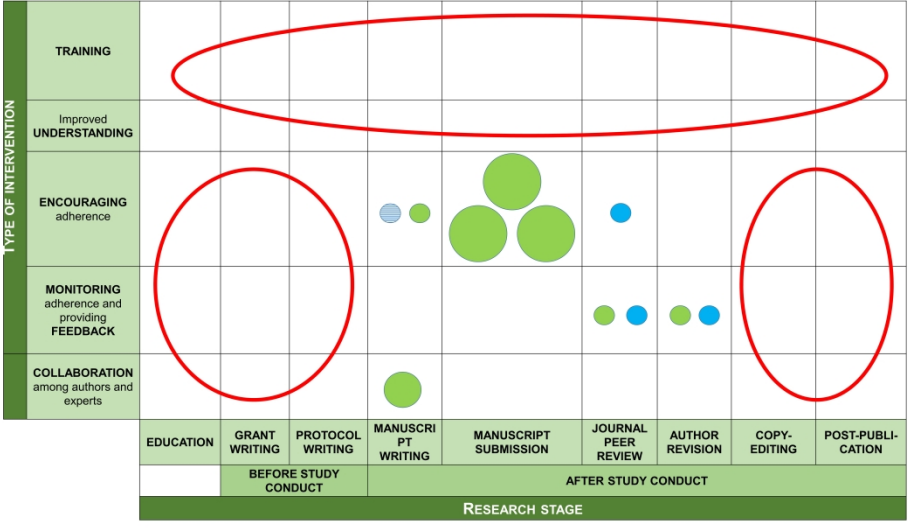

670x379mm (300 x 300 DPI)

| Acronym  | Full name                                                                                       |
|----------|-------------------------------------------------------------------------------------------------|
| CONSORT  | Consolidated Standards of Reporting Trials                                                      |
| STROBE   | Strengthening the Reporting of Observational Studies in Epidemiology                            |
| PRISMA   | Preferred Reporting Items for Systematic Reviews and Meta-Analyses                              |
| SRQR     | Standards for Reporting Qualitative Research                                                    |
| COREQ    | Consolidated criteria for Reporting Qualitative research                                        |
| STARD    | Standard Protocol Items: Recommendations for Interventional Trials                              |
| TRIPOD   | Transparent Reporting of a multivariable prediction model for Individual Prognosis or Diagnosis |
| SQUIRE   | Standards for Quality Improvement Reporting Excellence                                          |
| CHEERS   | Consolidated Health Economic Evaluation Reporting Standards                                     |
| SPIRIT   | Standard Protocol Items: Recommendations for Interventional Trials                              |
| PRISMA-P | Preferred Reporting Items for Systematic Review and Meta-Analysis Protocols                     |
| CARE     | Case Report                                                                                     |
| AGREE    | Appraisal of Guidelines, Research and Evaluation                                                |
| ARRIVE   | Animal Research: Reporting In Vivo Experiments                                                  |
| RIGHT    | Reporting Tool for Practice Guidelines in Health Care                                           |

| Steps | Search terms                                                                                                                             |
|-------|------------------------------------------------------------------------------------------------------------------------------------------|
| S1    | impact* [tw]                                                                                                                             |
| S2    | improv* [tw]                                                                                                                             |
| S3    | enhanc* [tw]                                                                                                                             |
| S4    | boost* [tw]                                                                                                                              |
| S5    | inreas* [tw]                                                                                                                             |
| S6    | influen* [tw]                                                                                                                            |
| S7    | effect [tw]                                                                                                                              |
| S8    | S1 OR S2 OR S3 OR S4 OR S5 OR S6 OR S7                                                                                                   |
| S9    | compliance [tw]                                                                                                                          |
| S10   | adherence [tw]                                                                                                                           |
| S11   | completeness [tw]                                                                                                                        |
| S12   | quality of reporting [tw]                                                                                                                |
| S13   | reporting quality [tw]                                                                                                                   |
| S14   | S9 OR S10 OR S11 OR S12 OR S 13                                                                                                          |
| S15   | Consolidated [tw] Standards [tw] Reporting [tw] Trials [tw] OR CONSORT[tw]                                                               |
| S16   | Strengthening [tw] Reporting [tw] Observational [tw] Studies [tw] Epidemiology[tw] OR STROBE[tw]                                         |
| S17   | Preferred [tw] Reporting [tw] Items [tw] Systematic [tw] reviews [tw] Meta-Analyses [tw] OR PRISMA[tw]                                   |
| S18   | Standards [tw] Reporting [tw] Qualitative Research[tw] OR SRQR[tw]                                                                       |
| S19   | Consolidated [tw] Criteria [tw] Reporting [tw] Qualitative [tw] Research[tw] OR COREQ[tw]                                                |
| S20   | Standard [tw] Protocol [tw] Items [tw] Recommendations [tw] Interventional [tw] Trials[tw] OR STARD[tw]                                  |
| S21   | Transparent [tw] Reporting [tw] multivariable [tw] prediction [tw] model [tw] Individual [tw] Prognosis [tw] Diagnosis[tw] OR TRIPOD[tw] |
| S22   | Standards [tw] QUality [tw] Improvement [tw] Reporting [tw] Excellence[tw] OR SQUIRE[tw]                                                 |
| S23   | Consolidated [tw] Health [tw] Economic [tw] Evaluation [tw] Reporting [tw] Standards[tw] OR CHEERS[tw]                                   |
| S24   | Standard [tw] Protocol [tw] Items [tw] Recommendations [tw] Interventional [tw] Trials[tw] OR SPIRIT[tw]                                 |
| S25   | Preferred [tw] Reporting [tw] Items [tw] Systematic [tw] Review [tw] Meta-Analysis [tw] Protocols[tw] OR PRISMA-P[tw]                    |
| S26   | Quality [tw] Reporting [tw] Meta-analyses[tw] OR QUOROM[tw]                                                                              |
| S27   | Case [tw] Report [tw] AND CARE[tw]                                                                                                       |
| S28   | Appraisal [tw] Guidelines [tw] Research [tw] Evaluation[tw] AND AGREE[tw]                                                                |
| S29   | Animal [tw] Research [tw] Reporting [tw] Vivo [tw] Experiments[tw] AND ARRIVE[tw]                                                        |
| S30   | Reporting [tw] Tool [tw] Practice [tw] Guidelines [tw] Health [tw] Care[tw] AND RIGHT[tw]                                                |
| S31   | S15 OR S16 OR S17 OR S18 OR S19 OR S20 OR S21 OR S22 OR S23 OR S24 OR S25 OR S26 OR S27 OR S28 OR S29 OR S30                             |
| S32   | S8 AND S14 AND S31                                                                                                                       |
| S33   | S32 AND "1996/01/01"[PDAT] : "2017/03/31"[PDAT]                                                                                          |

1  
2  
3  
4  
5  
6  
7  
8  
9  
10  
11  
12  
13  
14  
15  
16  
17  
18  
19  
20  
21  
22  
23  
24  
25  
26  
27  
28  
29  
30  
31  
32  
33  
34  
35  
36  
37  
38  
39  
40  
41  
42  
43  
44  
45  
46  
47  
48  
49  
50  
51  
52  
53  
54  
55  
56  
57  
58  
59  
60

For peer review only

| Type of intervention | Intervention                                                                      | Number of studies and study design                                                                                                                                                                               | Details of the intervention                                                                                                                                                                                                                                       | RGs implemented                                                                                                                               | Format of RG implementation          | Measure of adherence to RGs                                                                                  | Effect on adherence to RGs                                                                            |
|----------------------|-----------------------------------------------------------------------------------|------------------------------------------------------------------------------------------------------------------------------------------------------------------------------------------------------------------|-------------------------------------------------------------------------------------------------------------------------------------------------------------------------------------------------------------------------------------------------------------------|-----------------------------------------------------------------------------------------------------------------------------------------------|--------------------------------------|--------------------------------------------------------------------------------------------------------------|-------------------------------------------------------------------------------------------------------|
| Encouraged adherence | Implementation of the writing aid tool COBWEB (12)                                | 1 RCT                                                                                                                                                                                                            | Participants have to write the six domains of the methods section of the manuscript for the protocol they receive. They have access to COBWEB tool for a random three of the six domains.                                                                         | CONSORT & CONSORT extension for non-pharmacological interventions                                                                             | Bullet points and examples (6 items) | Mean global score for completeness of reporting (scale 0–10, items weighted).                                | Significant: increase of 2.1 (95% CI 1.5-2.7)                                                         |
|                      | Author use of a structured approach for reporting research (27)                   | 1 Observational study (cross-sectional evaluation)                                                                                                                                                               | Results are posted in a standard tabular format without discussions or conclusions.                                                                                                                                                                               | CONSORT                                                                                                                                       | Checklist (4 items)                  | Percentage compliance of each RG item                                                                        | Significant: all 4 items studied improved significantly                                               |
|                      | Journal endorsement (3 interventions, see "Details of the intervention") (30-109) | 80 observational studies (57 cross sectional evaluations of endorsing vs non-endorsing journals, 9 before and after evaluations of endorsing journals before and after endorsement, 14 both kind of evaluations) | A) Editorial statement endorsing certain RGs,<br>B) Recommendation or requirement to follow RGs in the "Instructions to authors", and<br>C) Requirement to submit a RG checklist together with the manuscript indicating page numbers corresponding to each item. | CONSORT (46 of 80)<br>CONSORT extensions (9 of 80)<br>QUOROM (3 of 80)<br>PRISMA (4 of 80)<br>PRISMA extensions (1 of 80)<br>STARD (11 of 80) | Checklist (all items)                | Relative proportions of studies adequately reporting any of the item & percentage compliance of each RG item | Significant for CONSORT: 25 items improved, five significantly<br><br>Not significant for other RGs** |

|                                             |                                                      |                                                     |                                                                                                                                                                                                                                                                                                                                                            |                                                                                     |                       |                                                                             |                                                                                                                         |
|---------------------------------------------|------------------------------------------------------|-----------------------------------------------------|------------------------------------------------------------------------------------------------------------------------------------------------------------------------------------------------------------------------------------------------------------------------------------------------------------------------------------------------------------|-------------------------------------------------------------------------------------|-----------------------|-----------------------------------------------------------------------------|-------------------------------------------------------------------------------------------------------------------------|
|                                             |                                                      |                                                     |                                                                                                                                                                                                                                                                                                                                                            | STROBE (4 of 80)<br>ARRIVE (1 of 80)<br>CONSORT,<br>STROBE and<br>PRISMA (11 of 80) |                       |                                                                             |                                                                                                                         |
|                                             | Suggestion for peer reviewers to use RGs (113)       | 1 RCT                                               | Peer reviewers are sent a standard letter encouraging them to use different reporting guidelines. Reviewers are not asked to report whether they used the reporting guideline in reviewing the manuscript.                                                                                                                                                 | CONSORT,<br>QUOROM, STARD                                                           | Checklist (all items) | Modified version of Manuscript Quality Assessment Instrument (scale 36-180) | Not significant: increase of 0.9 (95% CI -0.3 to +2.1)                                                                  |
| Monitoring adherence and providing feedback | Completeness of reporting check by the editors (115) | 1 Observational Study (Before and after evaluation) | Initial submissions are vetted by the editor-in-chief. If the submission is considered appropriate, manuscripts are assessed by the associate editor for CONSORT adherence. Authors are asked to make changes accordingly until associate editor deems appropriate that they move to the next step of the review process leading to an editorial decision. | CONSORT                                                                             | Checklist (all items) | Percentage compliance of each RG item                                       | Significant: Before – compliance ranged from 0% to 100% (Median 40%) / After – perfect compliance in 33 out of 37 items |

|                                                                                                  |                                                            |                                                                                                                                                                                                                   |                                   |                            |                                                                             |                                                                         |
|--------------------------------------------------------------------------------------------------|------------------------------------------------------------|-------------------------------------------------------------------------------------------------------------------------------------------------------------------------------------------------------------------|-----------------------------------|----------------------------|-----------------------------------------------------------------------------|-------------------------------------------------------------------------|
| Additional review against RGs (116)                                                              | 1 RCT                                                      | A senior statistician does an additional review of all papers and provides authors suggestions on how to follow reporting guideline checklists.                                                                   | STROBE, CONSORT, STARD            | Checklist (all items)      | Modified version of Manuscript Quality Assessment Instrument (scale 1 to 9) | Not significant: increase of 0.25 (95% CI -0.05 to +0.54)               |
| Active implementation of RG by editors (2 interventions, see "Details of the intervention") (13) | 1 Observational study (Interrupted time series evaluation) | A) Email is sent to authors to revise the abstract according to the guidelines at the revision stage and B) Changes are made by the assistant editors of these journals towards the end of the editorial process. | CONSORT extension for abstracts   | Checklist (9 of 17 items)  | Monthly mean number of items reported                                       | Significant: increase 1.50 items                                        |
| Implementation of the web-based tool WebCONSORT (121)                                            | 1 RCT                                                      | Journal editor includes a link to WebCONSORT in the revision letter to authors. Authors are directed to an automatically generated list of items and a flow diagram customised to their specific trial design.    | CONSORT & some CONSORT extensions | Checklist (10 of 25 items) | Percentage of possible items reported for each article                      | Not significant: increase of 0.04 (95% CI -0.02 to +0.10)               |
| Collaboration among authors and experts                                                          | 4 Observational studies (cross sectional evaluations)      | Statisticians (or epidemiologists or other quantitative methodologists) are involved in the design, conduct or reporting of the study                                                                             | CONSORT                           | Checklist (all items)      | Percentage of possible items reported for each article                      | Significant in three studies (84,126,128), not significant in one (127) |

\*According to the systematic review by Turner et al. (6) \*\*According to the systematic review by Stevens et al. (3)

# BMJ Open

## A scoping review on interventions to improve adherence to reporting guidelines in health research

|                                 |                                                                                                                                                                                                                                                                                                                                                                                                                                                             |
|---------------------------------|-------------------------------------------------------------------------------------------------------------------------------------------------------------------------------------------------------------------------------------------------------------------------------------------------------------------------------------------------------------------------------------------------------------------------------------------------------------|
| Journal:                        | <i>BMJ Open</i>                                                                                                                                                                                                                                                                                                                                                                                                                                             |
| Manuscript ID                   | bmjopen-2018-026589.R1                                                                                                                                                                                                                                                                                                                                                                                                                                      |
| Article Type:                   | Research                                                                                                                                                                                                                                                                                                                                                                                                                                                    |
| Date Submitted by the Author:   | 20-Nov-2018                                                                                                                                                                                                                                                                                                                                                                                                                                                 |
| Complete List of Authors:       | Blanco, David; Universitat Politècnica de Catalunya, Statistics and Operations Research<br>Altman, Doug; Centre for Statistics in Medicine<br>Moher, David; Ottawa Hospital Research Institute, Centre for Journalology<br>Boutron, Isabelle; Université Paris Descartes, Centre d'épidémiologie clinique<br>Kirkham, Jamie; University of Liverpool, Biostatistics<br>Cobo, Erik; Universitat Politècnica de Catalunya, Statistics and Operations Research |
| <b>Primary Subject Heading</b>: | Medical publishing and peer review                                                                                                                                                                                                                                                                                                                                                                                                                          |
| Secondary Subject Heading:      | Medical education and training, Research methods                                                                                                                                                                                                                                                                                                                                                                                                            |
| Keywords:                       | Scoping review, Quality of reporting, Completeness of reporting, Reporting guidelines, Knowledge synthesis, Adherence                                                                                                                                                                                                                                                                                                                                       |
|                                 |                                                                                                                                                                                                                                                                                                                                                                                                                                                             |

SCHOLARONE™  
Manuscripts



# 1 A scoping review on interventions to improve adherence to 2 reporting guidelines in health research

## 3 Authors

4 David Blanco<sup>1,2</sup>, Doug Altman<sup>3</sup>, David Moher<sup>4</sup>, Isabelle Boutron<sup>5</sup>, Jamie J Kirkham<sup>6\*</sup> and  
5 Erik Cobo<sup>1\*</sup>.

6 \*JJK and EC are joint senior authors.

7 <sup>1</sup>Statistics and Operations Research Department, Universitat Politècnica de Catalunya -  
8 Barcelona Tech, Barcelona, Spain.

9 <sup>2</sup>INSERM, U1153 Epidemiology and Biostatistics Sorbonne Paris Cité Research Center  
10 (CRESS), Methods of Therapeutic Evaluation of Chronic Diseases (METHODS) Team, Paris  
11 Descartes University, Sorbonne Paris Cité, Paris F-75014, France.

12 <sup>3</sup>Centre for Statistics in Medicine, University of Oxford, Oxford, UK.

13 <sup>4</sup>Centre for Journalology, Ottawa Hospital Research Institute, Ottawa, Canada.

14 <sup>5</sup>Centre d'Epidémiologie Clinique, Université Paris Descartes, Paris, France.

15 <sup>6</sup>Department of Biostatistics, University of Liverpool, Liverpool, UK.

16 Correspondence to David Blanco; [david.blanco.tena@upc.edu](mailto:david.blanco.tena@upc.edu)

## 17 Keywords

18 Scoping review, knowledge synthesis, reporting guidelines, completeness of reporting,  
19 quality of reporting, adherence

## 20 Abstract

21 **Objectives:** The goal of this study is to identify, analyse and classify interventions to  
22 improve adherence to reporting guidelines in order to obtain a wide picture of how the

1  
2  
3 23 problem of enhancing the completeness of reporting of biomedical literature has been  
4  
5 24 tackled so far.

6  
7  
8 25 **Design:** Scoping review.

9  
10  
11 26 **Search strategy:** We searched the MEDLINE, EMBASE, and Cochrane Library databases  
12  
13 27 and conducted a grey literature search for (i) studies evaluating interventions to improve  
14  
15 28 adherence to reporting guidelines in health research and (ii) other types of references  
16  
17 29 describing interventions that have been performed or suggested but never evaluated.  
18  
19 30 The characteristics and effect of the evaluated interventions were analysed. Moreover,  
20  
21 31 we explored the rationale of the interventions identified and determined the existing  
22  
23 32 gaps in research on the evaluation of interventions to improve adherence to reporting  
24  
25 33 guidelines.

26  
27 34 **Results:** 109 references containing 31 interventions (11 evaluated) were included. These  
28  
29 35 were grouped into five categories: (1) training on the use of reporting guidelines, (2)  
30  
31 36 improving understanding, (3) encouraging adherence, (4) checking adherence and  
32  
33 37 providing feedback, and (5) involvement of experts. Research gaps identified included  
34  
35 38 the evaluation of interventions (i) on training on the use of reporting guidelines and  
36  
37 39 improving understanding of these, (ii) at early stages of research, and (iii) after the final  
38  
39 40 acceptance of the manuscript.

40  
41 41 **Conclusions:** This scoping review identifies a wide range of strategies to improve  
42  
43 42 adherence to reporting guidelines that can be taken by different stakeholders. Future  
44  
45 43 randomised trials should consider evaluating some of the interventions that have not  
46  
47 44 been assessed yet, therefore addressing the research gaps identified.

## 48 49 45 **Strengths and limitations**

- 50  
51 46
- 52 • We considered wide range of reporting guidelines as well as their extensions.
  - 53 • Merging the evidence found in the published and grey literature allowed us to
  - 54 provide a broad picture of how the problem of enhancing adherence to reporting
  - 55 guidelines has been tackled so far and could be faced in the future.
  - 56 • The screening and data extraction were performed in duplicate.
- 57  
58  
59  
60

- 1  
2  
3  
4 51       • We could have missed evidence of possible interventions that may not be  
5 52           present in the published or grey literature but are instead used in practice and  
6  
7 53           continue to be used.  
8  
9

10 54   **Background**  
11  
12

13 55   Approximately 85% of all biomedical research today is estimated to be wasted, due, in  
14 56   part, to incomplete or inaccurate reporting (1). The past two decades have given rise to  
15 57   a number of changes in an effort to help authors and the broader scientific community  
16 58   properly report research methods and findings, which would allow them to contribute  
17 59   to the broader goal of combating waste in biomedical research. The most prominent of  
18 60   these changes has been the inception of reporting guidelines for different study types,  
19 61   data, and clinical areas (2).  
20  
21  
22  
23  
24  
25  
26

27 62   The vast majority of reporting guidelines have not yet been assessed as to whether they  
28 63   help improve the reporting of research (3), but some, such as the Consolidated  
29 64   Standards of Reporting Trials (CONSORT) for the reporting of randomised controlled  
30 65   trials (RCTs) (4), have been shown to enhance the completeness of reporting (5,6).  
31  
32  
33  
34

35 66   Dozens of systematic reviews have explored the extent of adherence to some reporting  
36 67   guidelines in certain areas of health research (7–10). Saaman et al. (11) went one step  
37 68   further and performed a systematic review of systematic reviews assessing adherence  
38 69   to reporting guidelines. As they considered a broad range of clinical areas and study  
39 70   designs, their results provided a global picture of adherence to reporting guidelines in  
40 71   health research. Although some studies reported acceptable overall levels of  
41 72   completeness of reporting and found that it had improved since the introduction of  
42 73   certain reporting guidelines such as CONSORT, the authors of most of the reviews (43 of  
43 74   50, 86%) concluded that more improvement is needed or that adherence to reporting  
44 75   guidelines was inadequate, poor, medium or suboptimal. Therefore, it is warranted to  
45 76   explore and develop strategies to improve the current levels of adherence to reporting  
46 77   guidelines.  
47  
48  
49  
50  
51  
52  
53  
54  
55  
56  
57  
58  
59  
60

1  
2  
3 78 In recent years, several initiatives aiming to improve adherence to reporting guidelines  
4  
5 79 have been proposed, some of which have already been evaluated. For example, the  
6  
7 80 effect of journal endorsement of reporting guidelines (3,5,6) and the implementation of  
8  
9 81 writing aid tools for authors such as the CONSORT-based web tool (COBWEB) (12) have  
10  
11 82 been assessed. While some of these strategies have not been shown to have a benefit  
12  
13 83 (3), others report better but still suboptimal levels of reporting (5,6) or even clear  
14  
15 84 benefits (12,13).

16  
17 85 As mentioned, several reviews have analysed the quality of reporting in different clinical  
18  
19 86 areas and for different study types (7–10). However, no scoping review has been  
20  
21 87 performed that provides a global picture of different strategies aiming to improve  
22  
23 88 adherence to reporting guidelines. Given the low levels of completeness of reporting in  
24  
25 89 health research that have been observed (11), along with the imperative need to take  
26  
27 90 further actions for mitigating this problem, we considered that performing such a  
28  
29 91 scoping review was warranted.

30  
31 92 In addition to analysing the implementation and effect of interventions that have  
32  
33 93 already been evaluated, we aimed to gather other possible strategies that could be  
34  
35 94 implemented and evaluated in the future.

36  
37 95 For clarification, some relevant terms used throughout the scoping are defined in Box  
38  
39 96 1, which is based on Stevens et al. (3).

40  
41 97 **Box 1:** relevant definitions in the context of this scoping review  
42  
43  
44  
45  
46  
47  
48  
49  
50  
51  
52  
53  
54  
55  
56  
57  
58  
59  
60

**Adherence:** Action(s) taken by authors to ensure that a research report is compliant with the items recommended by the appropriate/relevant reporting guideline. [These can take place before or after the first version of the manuscript is published.](#)

**Endorsement:** Action(s) taken by journals to indicate their support for the use of one or more reporting guideline(s) by authors submitting research reports for consideration.

**Implementation:** Action(s) taken by journals to ensure that authors adhere to an endorsed reporting guideline and that therefore published papers are completely reported.

**Complete reporting:** Pertains to the state of reporting of a study report and whether it is compliant with all the items recommended by the appropriate/relevant reporting guideline.

98

## 99 **Methods**

100 As presented in the published protocol (14), this scoping review follows the  
101 methodology manual published by the Joanna Briggs Institute for scoping reviews (15).

## 102 **Objectives**

103 The scoping review questions are:

- 104 1. What interventions to improve adherence to reporting guidelines in health  
105 research have been evaluated?
- 106 2. What further interventions to improve adherence to reporting guidelines have  
107 been performed or suggested but never evaluated?

108 We aimed to analyse and classify the interventions found for both questions in order to  
109 obtain a wide picture of how the problem of adhering better to reporting guidelines has  
110 been tackled so far and can be tackled in the future.

## 111 **Eligibility criteria**

112 We included:

- 113 1. Studies evaluating interventions aiming to improve adherence to reporting  
114 guidelines in health research, irrespective of study design.

1  
2  
3 115 2. Commentaries, editorials, letters, studies, and online sources describing possible  
4  
5 116 interventions to improve adherence to reporting guidelines that have been  
6  
7 117 performed or suggested but never evaluated.  
8

9  
10 118 The reporting guidelines considered were those shown on 8 May 2017 on the EQUATOR  
11  
12 119 (Enhancing the QUALity and Transparency Of Health Research) Network website (16) as  
13  
14 120 “Reporting Guidelines for main study types”. In addition, we included QUOROM (Quality  
15  
16 121 of Reporting of Meta-analyses), since it was the precursor of PRISMA. Supplementary  
17  
18 122 file 1 shows all reporting guidelines considered.

19  
20 123 We considered the following languages: English, Spanish, French, German and Catalan.  
21

#### 22 124 **Exclusion criteria**

23  
24  
25 125 We have excluded references that include interventions that do not specifically aim to  
26  
27 126 improve the completeness of reporting, even though these interventions may actually  
28  
29 127 influence completeness. For example, we have excluded clinical trial registration even  
30  
31 128 though it may enhance completeness of reporting, because its main goals are to improve  
32  
33 129 clinical trial transparency while also reducing publication and selective reporting biases.  
34

#### 35 130 **Search strategy and study selection**

36  
37  
38 131 On 8 May 2017, we searched PubMed, EMBASE, and Cochrane Library databases for  
39  
40 132 articles published between 1 January 1996 and 31 March 2017, in accordance with our  
41  
42 133 scheduled search (14). The detailed search terms for PubMed can be found in the  
43  
44 134 protocol.  
45

46  
47 135 The retrieved studies were exported into Mendeley and duplicates were automatically  
48  
49 136 removed using it. One reviewer (DB) first screened the titles and abstracts for eligibility.  
50  
51 137 Each of the other two reviewers (JJK and EC) was randomly assigned 50% of the  
52  
53 138 references and screened the titles and abstracts independently of the first reviewer. The  
54  
55 139 reviewers classified the references into one of the following groups:

56  
57 140 A) Evaluated: Includes references describing interventions to improve adherence to  
58  
59 141 reporting guidelines that have been empirically assessed.  
60

1  
2  
3 142 B) Non-evaluated: Includes references describing interventions to improve  
4 adherence to reporting guidelines that have been performed or suggested but  
5 143 never evaluated.  
6  
7 144

8 145 C) Unclear: Includes references (i) containing vague statements such as “Authors,  
9 editors, and journals have to adhere better to reporting guidelines to improve  
10 146 the quality of reporting” or “greater efforts have to be made by authors to check  
11 147 that their research is compliant with [the relevant reporting guideline]”, or (ii)  
12 148 not having the abstract available.  
13  
14 149

15 D) Excluded: Includes references (i) not describing interventions to improve  
16 150 adherence to any of the reporting guidelines considered and (ii) describing but  
17 151 not evaluating certain interventions that have already been classified as  
18 152 evaluated.  
19 153

20 154 Disagreements were solved by discussion among the reviewers.  
21  
22  
23  
24  
25

26 155 Second, one reviewer (DB) examined the full-text of all group A and B references to  
27 confirm the previous classification, then all group C references to reclassify them either  
28 156 as group A, B, or D. Re-classification was verified by the initial reviewer (JK or EC).  
29 157 Finally, one reviewer (DB) ensured literature saturation by searching the reference lists  
30 158 of included studies, the lists of articles citing them according to PubMed, and the  
31 159 individual studies included in two relevant systematic reviews (3,6).  
32 160

33 161 In addition, we performed a grey literature search, which included: the websites of  
34 162 networks and organizations promoting the use of reporting guidelines (i.e., EQUATOR  
35 163 Network and National Library of Medicine Research Reporting Guidelines and  
36 164 Initiatives); work groups of medical journal editors (i.e., International Committee of  
37 165 Medical Journal Editors (ICMJE) and World Association of Medical Editors (WAME));  
38 166 biomedical journal publishers (i.e., BMJ Publishing Group and BioMed Central); funding  
39 167 agencies (i.e., National Institute of Health (NIH) and European Research Council); online  
40 168 platforms of post-publication peer review (i.e., PubPeer and ScienceOpen); and the  
41 169 abstract books of the past editions of the International Congress on Peer Review and  
42 170 Biomedical Publication.  
43  
44  
45  
46  
47  
48  
49  
50  
51  
52  
53  
54  
55  
56  
57  
58  
59  
60

1  
2  
3 171 Some of the included references were described in studies co-authored by some of the  
4  
5 172 authors this scoping review. These references underwent the same process of screening,  
6  
7 173 data extraction, and data synthesis as the others.  
8  
9

#### 10 174 **Data extraction**

11  
12 175 A data extraction form was developed to collect the information necessary for data  
13  
14 176 synthesis. Two reviewers (DB, JJK) independently performed a pilot data extraction on a  
15  
16 177 random sample of 5 articles and subsequently refined the form.  
17  
18

19 178 Extracted data included:

- 20  
21  
22 179 1. Publication characteristics: title, year of publication, author, author's affiliation  
23  
24 180 country, and field of study.  
25  
26 181 2. Characteristics of the intervention:
- 27 182 a. Classification as evaluated or non-evaluated.
  - 28  
29 183 b. Research stage: education, grant writing, protocol writing, manuscript  
30  
31 184 writing, submission, journal peer review, copy-editing, and post-  
32  
33 185 publication.
  - 34  
35 186 c. Rationale of the intervention, which refers to the deduced reasons why  
36  
37 187 the intervention is evaluated or proposed.
  - 38  
39 188 d. For evaluated interventions: details of the intervention, study design (e.g.  
40  
41 189 RCT, before-after, etc.), reporting guidelines considered and format  
42  
43 190 (checklist, bullet points and/or examples), period of intervention,  
44  
45 191 number of journals and articles involved, effect size of the intervention  
46  
47 192 on adherence to reporting guidelines and measure used to assess this  
48  
49 193 effect.
- 50  
51 194 3. Relevant conclusions.

52 195 Two reviewers (DB, JJK) independently performed data extraction for all studies except  
53  
54 196 for the individual studies of the two systematic reviews evaluating journal endorsement  
55  
56 197 of reporting guidelines (3,6), since none of these studies described further interventions  
57  
58 198 and their results had already been reported in these reviews. Discrepancies between  
59  
60 199 reviewers were discussed and solved by consensus.



## 200 **Data synthesis**

201 Following data extraction, interventions to improve adherence to reporting guidelines  
202 were categorised as follows:

- 203 1. Training on the practical use of reporting guidelines: mentoring of different  
204 stakeholders on the practical use of reporting guidelines.
- 205 2. Enhancing accessibility and understanding: dissemination of reporting guidelines  
206 and the improvement of authors' understanding of their content.
- 207 3. Encouraging adherence: suggestions and tools to facilitate compliance.
- 208 4. Checking adherence and providing feedback: checking the level of compliance  
209 and indicating incorrect or missing items.
- 210 5. Involvement of experts: interaction and cooperation on methodology and  
211 reporting.

212 One reviewer (DB) performed the initial categorization, which was verified and refined  
213 by the other two reviewers (JJK and EC).

214 Furthermore, we determined the existing gaps in research on the evaluation of  
215 interventions to improve adherence to reporting guidelines. More specifically, we  
216 identified which categories of interventions and which research stages have not been  
217 addressed so far in studies evaluating interventions.

## 218 **Deviations from the protocol**

219 In order to better capture the most relevant aspects of the included studies, the original  
220 data extraction form proposed in the protocol was modified. We removed the health  
221 care area of the studies included, refined the research stages considered, and included  
222 more details on the implementation of the evaluated interventions.

## 223 **Patients and public involvement**

224 No patients or public were involved in the study.

225

## 226 **Results**

227 The database search yielded 1399 citations after deduplication (see Figure 1). Screening  
228 of titles and abstracts resulted in a first classification, after which 435 papers were  
229 included for full text review. We also reviewed the full text of 24 additional references  
230 found through forward citation searching. Furthermore, a grey literature search yielded  
231 7 additional references. Finally, 109 references were included. Some of these  
232 interventions appeared in more than one reference and some of the references  
233 contained more than one intervention. 90 of these references (86 observational and 4  
234 randomised studies) described 11 evaluated interventions and the other 19 (12 research  
235 studies, 2 editorials, 2 blogs, 1 commentary, 1 essay, and 1 perspective) described 20  
236 non-evaluated interventions. Figure 2 displays these 31 interventions according to their  
237 categorization and the research stage where they can be performed. Moreover, Table 1  
238 shows all interventions in a tabular format together with their rationale.

| Group                                                               | Intervention                                                                      | Rationale                                                                                                                                                                       |
|---------------------------------------------------------------------|-----------------------------------------------------------------------------------|---------------------------------------------------------------------------------------------------------------------------------------------------------------------------------|
| Training on the practical use of RGs                                | Introduction of RGs & journalology into graduate curricula (18-22)                | To introduce good research reporting habits early in young researchers' scientific careers.                                                                                     |
|                                                                     | Student's development of protocols for coursework and research using RGs (21)     |                                                                                                                                                                                 |
|                                                                     | Funder's support of author training on RGs (23)                                   | Authors, editors, and peer reviewers have insufficient training in issues related to reporting.                                                                                 |
|                                                                     | Training for peer reviewers and editors on RGs by journals (22,23)                |                                                                                                                                                                                 |
| Enhancing accessibility and understanding                           | Dissemination of RGs by scientific associations (24)                              | A large number of researchers are not aware of the existence of RGs.                                                                                                            |
|                                                                     | Translation of RGs to further languages (25)                                      | Language barriers may affect the proper use of RGs.                                                                                                                             |
|                                                                     | Development of expanded database of examples for each RG (26)                     | Authors need more examples of good reporting to properly understand certain items.                                                                                              |
| Encouraging adherence                                               | Author use of RGs as a template for grant application proposals (21)              | Using RGs in early stages may facilitate completeness of reporting of published research.                                                                                       |
|                                                                     | Required checklist for ethics approval application (11)                           |                                                                                                                                                                                 |
|                                                                     | Funder's requirement of checklists in author's report (21,108)                    |                                                                                                                                                                                 |
|                                                                     | Author use of the writing aid tool COBWEB (12)                                    | A) Authors need help to successfully adhere to RGs at the writing stage and B) Dividing RG items into bullet points and providing examples might help.                          |
|                                                                     | Author use of a structured approach for reporting research (47,112)               | A) To help authors avoid omissions, B) to aid reviewers and editors in appraising articles and C) to allow more efficient data extraction during the systematic review process. |
|                                                                     | Author markup of the manuscript to indicate where each RG item is addressed (109) |                                                                                                                                                                                 |
|                                                                     | Editorial statement endorsing certain RGs (27-46,48-106,113)                      | Authors read editorial statements and follow "Instructions to authors".                                                                                                         |
| Recommendation or requirement to follow RGs in the "Instructions to |                                                                                   |                                                                                                                                                                                 |

|                                                  |                                                                                                                                         |                                                                                                                                                                                                                         |
|--------------------------------------------------|-----------------------------------------------------------------------------------------------------------------------------------------|-------------------------------------------------------------------------------------------------------------------------------------------------------------------------------------------------------------------------|
|                                                  | authors" (27–46,48–106,113)                                                                                                             |                                                                                                                                                                                                                         |
|                                                  | Requirement to submit a RG checklist together with the manuscript indicating page numbers corresponding to each item (27–46,48–106,113) | Authors may not consider editorial statements or recommendations in "Instructions to authors" to be important. Compulsory submission of checklists or text mark-up may encourage authors to be more compliant with RGs. |
|                                                  | Requirement to populate and submit a RG checklist with text from the manuscript (114)                                                   |                                                                                                                                                                                                                         |
|                                                  | Journal development of core versions of RGs containing key items (110)                                                                  | Focusing on the most important items could be more effective than considering the whole checklist.                                                                                                                      |
|                                                  | Guidance to authors on manuscript preparation by publication officers (111)                                                             | Trained journal officers may enhance authors' compliance with RGs during manuscript preparation.                                                                                                                        |
|                                                  | Suggestion for peer reviewers to use RGs (107)                                                                                          | Peer reviewers often do not detect reporting                                                                                                                                                                            |
|                                                  | Editor's questions to peer reviewers about whether the authors have followed RGs (115)                                                  | flaws. Therefore, they may need to follow a more systematic approach and use RGs.                                                                                                                                       |
| <b>Checking adherence and providing feedback</b> | Completeness of reporting check by editors (117)                                                                                        | Requiring checklists at submission does not guarantee adherence. Editors and peer reviewers have to check whether submitted papers are compliant with RGs.                                                              |
|                                                  | Peer review against RGs (118)                                                                                                           |                                                                                                                                                                                                                         |
|                                                  | Internal peer review against RGs by a trained editorial assistant (120)                                                                 | It is extremely unlikely that the average clinical peer reviewer has the methodological expertise to check a paper against RGs.                                                                                         |
|                                                  | Implementation of the automatic tool Statreviewer (121)                                                                                 |                                                                                                                                                                                                                         |
|                                                  | Email to authors to revise the manuscript according to RGs (13)                                                                         | It might be more effective to ask authors for adherence to RGs during the revision process because they will do anything to get their paper published.                                                                  |
|                                                  | Implementation of the tool WebCONSORT (119)                                                                                             |                                                                                                                                                                                                                         |
|                                                  | Completeness of reporting check at copy-editing (122)                                                                                   | Copy-editing and post-publication offer alternate time points to improve adherence to                                                                                                                                   |
|                                                  | Post- publication peer review (123)                                                                                                     | RGs.                                                                                                                                                                                                                    |
| <b>Involvement of</b>                            | Statistician involvement (78,128-130)                                                                                                   | Professionals with specific knowledge of RGs                                                                                                                                                                            |

|         |                                  |                                                                            |
|---------|----------------------------------|----------------------------------------------------------------------------|
| experts | Medical writer involvement (108) | might help authors when designing, conducting or reporting their research. |
|---------|----------------------------------|----------------------------------------------------------------------------|

239 Among the 11 evaluated interventions identified, we found a variety of measures used  
 240 to assess their effect on adherence to reporting guidelines, including:

- 241 • Score for completeness of reporting for each paper, either assigning different or  
 242 equal weights to RG items, on a 0-10 scale.
- 243 • Percentage of items reported for each paper.
- 244 • Percentage of compliance per RG item.
- 245 • Score for the Manuscript Quality Assessment Instrument (17) for each paper.

246 Due to the heterogeneity of these measures and for the sake of clarity, we prefer to  
 247 omit the information on the exact effect sizes in the main body of the manuscript and  
 248 show it in Supplementary file 2, together with the implementation details of the  
 249 evaluated interventions. In this way, these effects can be understood in an appropriate  
 250 context.

251 Research gaps identified (see Figure 3) included the evaluation of interventions (i) on  
 252 training on the use of reporting guidelines and improving understanding of these, and  
 253 (ii) at early stages of research (education, grant writing or protocol writing), and (iii) after  
 254 the final acceptance of the manuscript (copyediting or post-publication peer review).

255 Hereafter, we describe the interventions found for each category (Table 1 and  
 256 Supplementary file 2 summarise these interventions).

### 257 ***Training on the practical use of reporting guidelines***

258 Four non-evaluated interventions related to educating different stakeholders on the  
 259 practical use of reporting guidelines were found (18-23).

260 In a first step, health profession schools could incorporate reporting guidelines into  
 261 curricula that address research methodology and publication standards (18–22). In line  
 262 with this, students could develop protocols for coursework and research using reporting  
 263 guidelines such as SPIRIT (randomised trials) and PRISMA-P (systematic reviews), and

educators may encourage adherence to those guidelines and grade the protocols using them (21). For their part, funders may consider supporting author training on reporting guidelines (23). Finally, journals or publishers may consider investing resources in training editors and reviewers on the content and use of reporting guidelines (22,23).

### ***Enhancing accessibility and understanding***

We identified three non-evaluated interventions focused on increasing the awareness of the existence of reporting guidelines, as well as the authors' understanding of content of these (24-26).

First, international scientific associations may play an important role in disseminating and popularizing reporting guidelines to large audiences (24). Second, reporting guideline developers might consider translating them to new languages that have not been addressed yet (25). Finally, further databases of examples of good reporting for different reporting guidelines that are accessible to authors can be developed, as has been done for CONSORT (26).

### ***Encouraging adherence***

Fourteen interventions found were associated with different strategies to facilitate compliance with reporting guidelines (11,12,21,27–115). Six of these were evaluated (47)(12,27–46,48–107,113).

Funders might require authors to use reporting guidelines as a template for grant application proposals (21). Later on, research ethics boards may require that protocols submitted for ethical approval clearly state which reporting guidelines the study will be using based on the study design, and that reporting guideline checklists are part of the application for ethics approval (11). Funders could also encourage adherence to reporting guidelines by asking for reporting guideline checklists as part of the authors' report (21,108).

One initiative to support authors adhering to reporting guidelines at the writing stage of the manuscript has been COBWEB, a writing aid tool that aims to help authors adequately combine the different extensions of the CONSORT statement (12). This tool divided the CONSORT items into bullet points showing the key elements that need to be

1  
2  
3 293 reported together with examples of adequate reporting. The impact of COBWEB was  
4  
5 294 evaluated in a randomised trial that showed a large effect of this intervention (12) (see  
6  
7 295 Supplementary file 2 for more details about this and other evaluated interventions). A  
8  
9 296 second option to support authors at manuscript writing is that they follow a more  
10  
11 297 structured approach. For example, ClinicalTrials.gov requires authors to report key  
12  
13 298 information in a tabular format when registering a study or making available its results  
14  
15 299 (116). This has been shown to be effective: some results posted on this platform,  
16  
17 300 especially harms, are more complete than those in corresponding journal articles  
18  
19 301 reporting the same trials (47). Another possibility to improve the structure of  
20  
21 302 manuscripts is to include new subheadings corresponding to different reporting  
22  
23 303 guideline items within the traditional IMRaD format (Introduction, Methods, Results,  
24  
25 304 and Discussion), as the American Journal of Orthodontics and Dentofacial Orthopedics  
26  
27 305 (AJO-DO) proposed (112). Finally, authors may also avoid omissions when writing the  
28  
29 306 manuscript if mark up the text and highlight where each item of the relevant checklist is  
30  
31 307 addressed (109).

32  
33 308 At manuscript submission stage, different editorial actions have been taken to improve  
34  
35 309 adherence to reporting guidelines. The most popular is what has traditionally been  
36  
37 310 defined as journal endorsement of reporting guidelines, which is usually defined as one  
38  
39 311 or more of the three following interventions: (a) journal editorial statement endorsing  
40  
41 312 certain reporting guidelines; (b) requirement or recommendation in journal's  
42  
43 313 'Instructions to Authors' to follow certain reporting guidelines when preparing their  
44  
45 314 manuscript; or (c) requirement for authors to submit the appropriate reporting  
46  
47 315 guideline checklist together with their manuscript indicating page numbers  
48  
49 316 corresponding to each item (6). Dozens of observational studies have explored the  
50  
51 317 possible effect of journal endorsement of different reporting guidelines in different  
52  
53 318 clinical areas (27–46,48–106,113). A recent systematic review focused on CONSORT  
54  
55 319 evaluations showed relative but suboptimal improvements in the completeness of  
56  
57 320 reporting in journals by following the aforementioned policies (6), while another  
58  
59 321 systematic review considering 9 other guidelines showed no improvements (3).

58 322 Journals might also consider other strategies to enhance adherence to reporting  
59  
60 323 guidelines at submission. A first option could be to develop shorter, core versions of

1  
2  
3 324 reporting guidelines containing key items, which could be provided to authors as part of  
4  
5 325 the submission process (110). Second, they might introduce publication officers in order  
6  
7 326 to provide guidance to authors on preparing manuscripts for submission (111). Third,  
8  
9 327 editors may ask authors to populate the relevant checklist with text from their  
10  
11 328 manuscript and not accept a submission unless this is provided (114).

12  
13 329 Finally, editors may suggest that peer reviewers use reporting guidelines (107). In  
14  
15 330 addition, by asking peer reviewers questions about whether the author has followed  
16  
17 331 reporting guidelines, this might be an indirect way to encourage them (115).

### 20 332 ***Checking adherence and providing feedback***

21  
22  
23 333 Eight interventions were related to monitoring level of compliance with reporting  
24  
25 334 guidelines of the manuscripts and providing instructions to authors on how to improve  
26  
27 335 the reporting of missing or incorrect items (13,117–123). Four of them were evaluated  
28  
29 336 (13,117–119).

30  
31 337 Some journals have opted for implementing reporting guidelines at peer review. First,  
32  
33 338 an associate editor may assess manuscripts for adherence to the relevant reporting  
34  
35 339 guideline and ask authors to make changes accordingly (117). This process may be  
36  
37 340 repeated until the associate editor thinks that the manuscript can move to the next step  
38  
39 341 of the review process, leading to an editorial decision. This intervention was evaluated  
40  
41 342 at the AJO-DO and showed satisfactory results: 33 of 37 items reached perfect  
42  
43 343 compliance (117). Second, peer reviewers could also assess the manuscripts against the  
44  
45 344 appropriate checklist (118). While the observed effect of this intervention was slightly  
46  
47 345 positive, it was smaller than hypothesized. In fact, investigators pointed out that authors  
48  
49 346 tended to comply better with suggestions coming from standard reviews rather than  
50  
51 347 from reviews against reporting guidelines, implying that it might be difficult to adhere  
52  
53 348 to high methodological standards at late stages of research if these standards are not  
54  
55 349 considered earlier in the research process. Third, journals could also ask trained editorial  
56  
57 350 assistants to check manuscripts against reporting guidelines (120) or to implement  
58  
59 351 automatic peer review tools such as Statreviewer (124), software that automatically  
60  
352 checks adherence to reporting guidelines and evaluates the appropriate use and  
353 reporting of statistical tests (121). Currently, its performance is being assessed through



1  
2  
3 354 a pilot trial in collaboration with four BioMed Central Journals (121). In any of those  
4  
5 355 cases, emails could be sent to authors asking them to revise the manuscript according  
6  
7 356 to guidelines (13). To do this, the EQUATOR Network has provided standard letters that  
8  
9 357 can be used a) after checks by an editor or a single peer reviewer, b) after full peer  
10  
11 358 review, or c) alongside acceptance (125). Furthermore, at the time of author revision of  
12  
13 359 the manuscript, Hopewell et al. found no significant effect when incorporating  
14  
15 360 WebCONSORT, a web-based tool that generates a unique list of items customised to the  
16  
17 361 trial design, to the revision process of journals that endorsed CONSORT but had no active  
18  
19 362 policy for implementing it (119). Finally, in a late stage of the publication process,  
20  
21 363 copyediting of the manuscript could also ensure that all items are covered (122).

22  
23 364 Once the paper is published, the scientific community could use online platforms of  
24  
25 365 post-publication peer review such as PubPeer (126) or ScienceOpen (127) to evaluate  
26  
27 366 the adherence to reporting guidelines of published articles and to provide feedback to  
28  
29 367 authors (123).

### 30 368 ***Involvement of experts***

31  
32  
33  
34 369 Two interventions identified implied interaction and cooperation between authors and  
35  
36 370 experts on methodology and reporting at different stages of research (78,108,128–130).  
37  
38 371 One of them was evaluated (78,128–130).

39  
40 372 On the one hand, statisticians (or epidemiologists or other quantitative methodologists)  
41  
42 373 may get involved in the design, conduct or reporting of the study might contribute to  
43  
44 374 properly reporting key areas such as sample size calculation, randomization, blinding,  
45  
46 375 and appropriate statistical analysis (129). While three studies found a statistically  
47  
48 376 significant positive relationship between CONSORT scores and statistician involvement  
49  
50 377 (78,129,130), another one did not (128). On the other hand, it has been hypothesized  
51  
52 378 that the involvement of medical writers during the manuscript writing stage of research  
53  
54 379 could improve the completeness of reporting (108).

### 55 56 380 **Interventions described in papers co-authored by authors of this scoping review**

57  
58  
59  
60

1  
2  
3 381 25 (of 109) included references describing 21 (of 31) included interventions were co-  
4  
5 382 authored by at least one of the authors of this scoping review  
6  
7 383 (12,13,63,67,74,76,80,104,107,111,114,115,20,117–120,123,21–23,26,47,54,55).  
8  
9

## 10 384 **Discussion**

11  
12  
13 385 In this scoping review, we identified 31 interventions to improve adherence to reporting  
14  
15 386 guidelines. We have also determined the gaps in research on the evaluation of this type  
16  
17 387 of interventions. By considering a wide range of reporting guidelines as well as their  
18  
19 388 extensions and merging the evidence found in the published and grey literature, this  
20  
21 389 review provides a broad picture of how the problem of enhancing adherence to  
22  
23 390 reporting guidelines has been tackled so far and could be faced in the future.

24  
25 391 This study reveals that it is primarily journals that have made most of the efforts to  
26  
27 392 improve adherence to reporting guidelines in health research – although they can  
28  
29 393 certainly do more. Typically, their strategies range from making available editorial  
30  
31 394 statements that endorse certain reporting guidelines, recommending or requiring  
32  
33 395 authors to follow reporting guidelines in the “Instructions to authors”, and requiring  
34  
35 396 authors to submit a reporting guideline checklist together with the manuscript, with  
36  
37 397 page numbers indicated for each item. However, these strategies have been shown not  
38  
39 398 to have the desired effect (3,6,131). Recent research has called for more active and  
40  
41 399 enforced journal policies throughout the editorial process, such as requiring the use of  
42  
43 400 structured approaches with new subheadings adapted to different kinds of study  
44  
45 401 designs (112), which was also found to be beneficial in a new study outside of our search  
46  
47 402 period (132); providing guidance on manuscript preparation (111); making sure the peer  
48  
49 403 review process involves editorial assistants who have specific training on reporting  
50  
51 404 issues (120); and implementing automatic peer review tools (121). Journals will vary in  
52  
53 405 their ability to make some of these strategies effective, depending on factors such as  
54  
55 406 their resources, their guidelines to peer reviewers and the dedication of their editors –  
56  
57 407 many editors and editorial staff work part-time and have limited amount of time.

58  
59 408 Moreover, editors’ education and performance should be improved. A recent study  
60  
409 pointed out that more than a third (39%) of the manuscripts classified as randomised

1  
2  
3 410 trials by the editorial staff were not actually randomised trials (119,133). Consequently,  
4  
5 411 it seems difficult to improve author and peer reviewer adherence to reporting guidelines  
6  
7 412 if journal gatekeepers are not properly trained in methodological and reporting issues.  
8

9  
10 413 Apart from journals, editors and peer reviewers, other key stakeholders such as medical  
11  
12 414 schools, research funders, universities and other research institutions should also take  
13  
14 415 responsibility regarding this issue. This scoping review provides some strategies to  
15  
16 416 follow. However, as the problem is complex and the possible interventions are varied,  
17  
18 417 enhancing the completeness of reporting most likely depends not so much on any  
19  
20 418 isolated action but on a set of strategies by several different stakeholders. These could  
21  
22 419 be enacted at different stages of research, from education to article post-publication.

23  
24 420 For interventions aiming to improve adherence to reporting guidelines, we should  
25  
26 421 require the same level of evidence that we require for interventions to improve health.  
27  
28 422 For this reason, it is striking that we found only 4 published randomised trials that  
29  
30 423 evaluated interventions to improve adherence to reporting guidelines (12,107,118,119).  
31  
32 424 Among these trials, statistically significant effect of the intervention was only observed  
33  
34 425 for the use of the writing aid tool for authors COBWEB (12). While performing an  
35  
36 426 additional review against reporting guidelines showed slightly positive but not  
37  
38 427 significant effect (118), suggesting the use of reporting guidelines to peer reviewers  
39  
40 428 (107) or implementing at the process of author revision of the manuscript the web-  
41  
42 429 based tool WebCONSORT showed no benefit (119). The rest of the evaluations of  
43  
44 430 interventions found (86 of 90) were observational studies, whose results are subject to  
45  
46 431 the influence of confounding factors (6). For example, evaluations of the effect of journal  
47  
48 432 endorsement may be influenced by whether different journals are actively checking that  
49  
50 433 authors adhere to the requirements or recommendations they provide to authors at  
51  
52 434 submission (6). For all these reasons, future randomised trials should be performed to  
53  
54 435 evaluate further interventions to improve adherence to reporting guidelines. Moreover,  
55  
56 436 these trials might consider addressing some of the research gaps identified in this  
57  
58 437 review, such as improving adherence to reporting guidelines at the grant application or  
59  
60 438 protocol writing stages.

1  
2  
3 439 A few of the interventions found in this review were shown to enhance adherence to  
4 reporting guidelines. However, it is noteworthy there is no evidence that some  
5 440 successful interventions (12,117) have been implemented more widely later. For this  
6 441 reason, more resources and efforts are needed to further implement these  
7 442 interventions in other settings, evaluate the effect, and share the results with the  
8 443 scientific community. In any case, it is important to keep in mind that contemporary  
9 444 publication culture may harm the potential improvements in reporting quality. This  
10 445 could result from the fact that most scientists feel that the primary evaluation tool of  
11 446 their research is the quantity of their scientific output rather than its quality (134); and  
12 447 such attitudes may undermine the potential effect of any intervention to improve  
13 448 adherence to reporting guidelines.  
14 449

15  
16 450 Our scoping review has some limitations. First, we did not formally assess the  
17 451 methodological quality of the studies that evaluated interventions. Second, restricting  
18 452 to certain databases or not having standard search terms for the databases searched  
19 453 may have excluded relevant publications. Third, it is possible that we could have missed  
20 454 evidence of possible interventions that may have never been reflected in the published  
21 455 or grey literature but are instead used in practice and continue to be used. For example,  
22 456 journals might be applying specific editorial strategies that are not publicly available on  
23 457 their websites or in the published literature.  
24  
25  
26  
27  
28  
29  
30  
31  
32  
33  
34  
35  
36  
37  
38  
39

40 458 This review is part of a larger project whose next goals are (i) to capture editors'  
41 459 perceptions on the barriers and facilitators of some promising interventions identified  
42 460 in this review, (ii) to explore new possible interventions, and (iii) to evaluate one of these  
43 461 interventions in collaboration with BMJ Open.  
44  
45  
46  
47

## 48 462 **Conclusion**

49  
50  
51 463 Improving adherence to reporting guidelines is one of the key issues in order to enhance  
52 464 complete and accurate reporting and therefore reduce waste in research.  
53  
54

55  
56 465 Different stakeholders – such as research funders, ethics boards, and journals – should  
57 466 consider implementing and evaluating some of the interventions identified in this study.  
58  
59  
60

## 467 **List of abbreviations**

468 AJO-DO: American Journal of Orthodontics and Dentofacial Orthopedics; CONSORT:  
469 CONSolidated Standards Of Reporting Trials; COBWEB: CONSORT-based web tool;  
470 EQUATOR: Enhancing the QUALity and Transparency Of Health Research; RCT:  
471 Randomised Controlled Trial; RG: Reporting Guideline; SPIRIT: Standard Protocol Items:  
472 Recommendations for Interventional Trials; PRISMA: Preferred Reporting Items for  
473 Systematic Reviews and Meta-Analyses

## 474 **Declarations**

475 **Funding:** This scoping review belongs to the ESR 14 research project from the Methods in  
476 Research on Research (MiRoR) project (<http://mirror-ejd.eu/>), which has received funding from  
477 the European Union's Horizon 2020 research and innovation programme under the Marie  
478 Sklodowska-Curie grant agreement No 676207. DM is supported through a University Research  
479 Chair (University of Ottawa).

480 **Competing interests:** DA and DM are Directors of the UK and Canadian EQUATOR Centres,  
481 respectively. IB is deputy director of French EQUATOR Centre.

482 **Author contributions:** All authors contributed to conceptualizing and designing the study. DB,  
483 EC, and JJK independently performed screening. DB and JJK independently performed data  
484 extraction. DB performed initial data synthesis and EC, IB, DM, DGA, and JJK refined it. DB  
485 drafted the manuscript. EC, IB, DM, DGA, and JJK made major revisions. Due to the strong  
486 involvement of JJK and EC at several different stages of the study, all authors agreed to consider  
487 them joint senior authors of the scoping review, although EC was the only senior author of the  
488 protocol. All authors read and approved the final manuscript, which was completed in April  
489 2018. DGA passed away in June 2018 and therefore could not approve the revised manuscript  
490 (November 2018).

491 **Availability of data and materials:** The datasets used and/or analysed during the current study  
492 are available from the corresponding author on reasonable request.

493 **Acknowledgements:** The authors thank the MiRoR Project (<http://mirror-ejd.eu/>) and Marie  
494 Sklodowska-Curie Actions for their support. The authors also thank Matt Elmore for editorial  
495 help.

496 **References**

- 497 1. Chalmers I, Glasziou P. Avoidable waste in the production and reporting of  
498 research evidence. *Lancet* [Internet]. 2009 Jul [cited 2018 Nov  
499 12];374(9683):86–9. Available from:  
500 <http://linkinghub.elsevier.com/retrieve/pii/S0140673609603299>
- 501 2. EQUATOR Network. Library for health research reporting. Available from:  
502 [http://www.equator-network.org/resource-centre/library-of-health-research-](http://www.equator-network.org/resource-centre/library-of-health-research-reporting)  
503 [reporting](http://www.equator-network.org/resource-centre/library-of-health-research-reporting)
- 504 3. Stevens A, Shamseer L, Weinstein E, Yazdi F, Turner L, Thielman J, et al. Relation  
505 of completeness of reporting of health research to journals' endorsement of  
506 reporting guidelines: systematic review. *BMJ* [Internet]. 2014 Jun 25 [cited 2017  
507 Jun 7];348(jun25 2):g3804–g3804. Available from:  
508 <http://www.bmj.com/cgi/doi/10.1136/bmj.g3804>
- 509 4. Schulz KF, Altman DG, Moher D, CONSORT Group. CONSORT 2010 statement:  
510 updated guidelines for reporting parallel group randomised trials. *BMJ*  
511 [Internet]. 2010 Mar 23 [cited 2018 Mar 3];340:c332. Available from:  
512 <http://www.ncbi.nlm.nih.gov/pubmed/20332509>
- 513 5. Plint AC, Moher D, Morrison A, Schulz K, Altman DG, Hill C, et al. Does the  
514 CONSORT checklist improve the quality of reports of randomised controlled  
515 trials? A systematic review. *Med J Aust* [Internet]. 2006 Sep 4 [cited 2017 Feb  
516 24];185(5):263–7. Available from:  
517 <http://www.ncbi.nlm.nih.gov/pubmed/16948622>
- 518 6. Turner L, Shamseer L, Altman DG, Schulz KF, Moher D, L. T, et al. Does use of the  
519 CONSORT Statement impact the completeness of reporting of randomised  
520 controlled trials published in medical journals? A Cochrane review. *Syst Rev*  
521 [Internet]. 2012 Nov 29 [cited 2017 Feb 24];1(1):60. Available from:  
522 [http://systematicreviewsjournal.biomedcentral.com/articles/10.1186/2046-](http://systematicreviewsjournal.biomedcentral.com/articles/10.1186/2046-4053-1-60)  
523 [4053-1-60](http://systematicreviewsjournal.biomedcentral.com/articles/10.1186/2046-4053-1-60)

- 1  
2  
3 524 7. Bereza BG, Machado M, Einarson TR, B.G. B, M. M, T.R. E, et al. Assessing the  
4  
5 525 reporting and scientific quality of meta-analyses of randomized controlled trials  
6  
7 526 of treatments for anxiety disorders. *Ann Pharmacother* [Internet]. 2008 Oct 26  
8  
9 527 [cited 2017 Feb 23];42(10):1402–9. Available from:  
10  
11 528 <http://www.embase.com/search/results?subaction=viewrecord&from=export&i>  
12  
13 529 [d=L352440213](http://www.embase.com/search/results?subaction=viewrecord&from=export&i)  
14  
15 530 8. Fung AE, Palanki R, Bakri SJ, Depperschmidt E, Gibson A. Applying the CONSORT  
16  
17 531 and STROBE statements to evaluate the reporting quality of neovascular age-  
18  
19 532 related macular degeneration studies. *Ophthalmology* [Internet]. 2009 Feb  
20  
21 533 [cited 2017 Jun 26];116(2):286–96. Available from:  
22  
23 534 <http://linkinghub.elsevier.com/retrieve/pii/S0161642008009020>  
24  
25 535 9. Rios LP, Oduyungbo A, Moitri MO, Rahman MO, Thabane L, L.P. R, et al. Quality  
26  
27 536 of reporting of randomized controlled trials in general endocrinology literature.  
28  
29 537 *J Clin Endocrinol Metab* [Internet]. 2008 Oct [cited 2017 Feb 24];93(10):3810–6.  
30  
31 538 Available from: <http://press.endocrine.org/doi/10.1210/jc.2008-0817>  
32  
33  
34 539 10. Shea B, Bouter LM, Grimshaw JM, Francis D, Ortiz Z, Wells GA, et al. Scope for  
35  
36 540 improvement in the quality of reporting of systematic reviews. From the  
37  
38 541 Cochrane Musculoskeletal Group. *J Rheumatol* [Internet]. 2006 Jan [cited 2017  
39  
40 542 Feb 24];33(1):9–15. Available from:  
41  
42 543 <http://www.ncbi.nlm.nih.gov/pubmed/16267878>  
43  
44 544 11. Samaan Z, Mbuagbaw L, Kosa D, Borg Debono V, Dillenburg R, Zhang S, et al. A  
45  
46 545 systematic scoping review of adherence to reporting guidelines in health care  
47  
48 546 literature. *J Multidiscip Healthc* [Internet]. 2013 May [cited 2017 Jun 26];6:169–  
49  
50 547 88. Available from: <http://www.dovepress.com/a-systematic-scoping-review-of>  
51  
52 548 [adherence-to-reporting-guidelines-in-he-peer-reviewed-article-JMDH](http://www.dovepress.com/a-systematic-scoping-review-of)  
53  
54 549 12. Barnes C, Boutron I, Giraudeau B, Porcher R, Altman DG, Ravaud P. Impact of an  
55  
56 550 online writing aid tool for writing a randomized trial report: the COBWEB  
57  
58 551 (Consort-based WEB tool) randomized controlled trial. *BMC Med* [Internet].  
59  
60 552 2015 Sep 15 [cited 2017 Feb 24];13(1):221. Available from:

- 1  
2  
3 553 <http://bmcmedicine.biomedcentral.com/articles/10.1186/s12916-015-0460-y>  
4  
5  
6 554 13. Hopewell S, Ravaud P, Baron G, Boutron I. Effect of editors' implementation of  
7  
8 555 CONSORT guidelines on the reporting of abstracts in high impact medical  
9  
10 556 journals: interrupted time series analysis. 2012 Jun 22 [cited 2017 Jan  
11  
12 557 16];344(jun22 1). Available from:  
13  
14 558 <http://www.ncbi.nlm.nih.gov/pubmed/22730543>  
15  
16 559 14. Blanco D, Kirkham JJ, Altman DG, Moher D, Boutron I, Cobo E. Interventions to  
17  
18 560 improve adherence to reporting guidelines in health research: a scoping review  
19  
20 561 protocol. *BMJ Open* [Internet]. 2017;7(11):e017551. Available from:  
21  
22 562 <http://bmjopen.bmj.com/lookup/doi/10.1136/bmjopen-2017-017551>  
23  
24 563 15. Reviewers' Manual. 2015; Available from: [www.joannabriggs.org](http://www.joannabriggs.org)  
25  
26  
27 564 16. EQUATOR Network. Available from: <http://www.equator-network.org/>  
28  
29  
30 565 17. Goodman SN, Berlin J, Fletcher SW, Fletcher RH. Manuscript quality before and  
31  
32 566 after peer review and editing at *Annals of Internal Medicine*. *Ann Intern Med*  
33  
34 567 [Internet]. 1994 Jul 1 [cited 2018 Nov 16];121(1):11–21. Available from:  
35  
36 568 <http://www.ncbi.nlm.nih.gov/pubmed/8198342>  
37  
38 569 18. Ma B, Qi G, Lin X, Wang T, Chen Z, Yang K. Epidemiology, quality, and reporting  
39  
40 570 characteristics of systematic reviews of acupuncture interventions published in  
41  
42 571 Chinese journals. *J Altern Complement Med* [Internet]. 2012 Sep [cited 2017 Jul  
43  
44 572 17];18(9):813–7. Available from:  
45  
46 573 <http://online.liebertpub.com/doi/abs/10.1089/acm.2011.0274>  
47  
48 574 19. Larson EL, Cortazal M. Publication guidelines need widespread adoption. *J Clin*  
49  
50 575 *Epidemiol* [Internet]. 2012 Mar [cited 2017 Jul 21];65(3):239–46. Available from:  
51  
52 576 <http://linkinghub.elsevier.com/retrieve/pii/S0895435611002290>  
53  
54  
55 577 20. Sarkis-Onofre R, Cenci MS, Moher D, Pereira-Cenci T. Research Reporting  
56  
57 578 Guidelines in Dentistry: A Survey of Editors. *Braz Dent J* [Internet]. 2017 [cited  
58  
59 579 2017 Nov 9];28(1):3–8. Available from: <http://dx.doi.org/10.1590/0103->  
60



- 1  
2  
3 580 6440201601426  
4  
5  
6 581 21. Shamseer L, Moher D, Clarke M, Gherzi D, Liberati A, Petticrew M, et al.  
7  
8 582 Preferred reporting items for systematic review and meta-analysis protocols  
9  
10 583 (PRISMA-P) 2015: elaboration and explanation. *BMJ* [Internet]. 2015 Jan 2 [cited  
11  
12 584 2017 Feb 24];349(jan02 1):g7647–g7647. Available from:  
13  
14 585 <http://www.bmj.com/cgi/doi/10.1136/bmj.g7647>  
15  
16 586 22. Simera I, Moher D, Hirst A, Hoey J, Schulz KF, Altman DG. Transparent and  
17  
18 587 accurate reporting increases reliability, utility, and impact of your research:  
19  
20 588 reporting guidelines and the EQUATOR Network. *BMC Med* [Internet].  
21  
22 589 2010;8(1):24. Available from:  
23  
24 590 <http://bmcmmedicine.biomedcentral.com/articles/10.1186/1741-7015-8-24>  
25  
26 591 23. Glasziou P, Altman DG, Bossuyt P, Boutron I, Clarke M, Julious S, et al. Reducing  
27  
28 592 waste from incomplete or unusable reports of biomedical research. *Lancet*  
29  
30 593 [Internet]. 2014 Jan 18 [cited 2017 Sep 29];383(9913):267–76. Available from:  
31  
32 594 <http://www.ncbi.nlm.nih.gov/pubmed/24411647>  
33  
34  
35 595 24. Verbeek J. Moose Consort Strobe and Miame Stard Remark or how can we  
36  
37 596 improve the quality of reporting studies. *Scand J Work Environ Health* [Internet].  
38  
39 597 2008 Jun [cited 2017 Feb 24];34(3):165–7. Available from:  
40  
41 598 <http://www.ncbi.nlm.nih.gov/pubmed/18728905>  
42  
43 599 25. Kim KH, Kang JW, Lee MS, Lee J-D. Assessment of the quality of reporting in  
44  
45 600 randomised controlled trials of acupuncture in the Korean literature using the  
46  
47 601 CONSORT statement and STRICTA guidelines. *BMJ Open* [Internet]. 2014 Jul 29  
48  
49 602 [cited 2017 Jul 17];4(7):e005068. Available from:  
50  
51 603 <http://bmjopen.bmj.com/cgi/doi/10.1136/bmjopen-2014-005068>  
52  
53 604 26. Moher D, Hopewell S, Schulz KF, Altman DG. Resources for authors of reports of  
54  
55 605 randomized trials: harnessing the wisdom of authors, editors, and readers. *Trials*  
56  
57 606 [Internet]. 2011;12(1):98. Available from:  
58  
59 607 <http://trialsjournal.biomedcentral.com/articles/10.1186/1745-6215-12-98>  
60

- 1  
2  
3 608 27. Faunce TA, Buckley NA. Of consents and CONSORTs: reporting ethics, law, and  
4  
5 609 human rights in RCTs involving monitored overdose of healthy volunteers pre  
6  
7 610 and post the &quot;CONSORT&quot; guidelines. *J Toxicol Clin Toxicol* [Internet].  
8  
9 611 2003 [cited 2017 Nov 9];41(2):93–9. Available from:  
10  
11 612 <http://www.ncbi.nlm.nih.gov/pubmed/12733843>  
12  
13 613 28. Halpern SH, Darani R, Douglas MJ, Wight W, Yee J, S.H. H, et al. Compliance with  
14  
15 614 the CONSORT checklist in obstetric anaesthesia randomised controlled trials. *Int*  
16  
17 615 *J Obstet Anesth* [Internet]. 2004 Oct [cited 2017 Feb 24];13(4):207–14. Available  
18  
19 616 from: <http://www.ncbi.nlm.nih.gov/pubmed/15477048>  
20  
21 617 29. Hewitt C, Hahn S, Torgerson DJ, Watson J, Bland JM. Adequacy and reporting of  
22  
23 618 allocation concealment: review of recent trials published in four general medical  
24  
25 619 journals. *BMJ* [Internet]. 2005 May 7 [cited 2017 Nov 9];330(7499):1057–8.  
26  
27 620 Available from: <http://www.bmj.com/cgi/doi/10.1136/bmj.38413.576713.AE>  
28  
29  
30 621 30. Greenfield MLVH, Rosenberg AL, O???Reilly M, Shanks AM, Sliwinski MJ, Naus  
31  
32 622 MD. The Quality of Randomized Controlled Trials in Major Anesthesiology  
33  
34 623 Journals. *Anesth Analg* [Internet]. 2005 Jun [cited 2017 Nov 9];100(6):1759–64.  
35  
36 624 Available from: <http://www.ncbi.nlm.nih.gov/pubmed/15920210>  
37  
38 625 31. Llorca J, Martínez-Sanz F, Prieto-Salceda D, Fariñas-Alvarez C, Chinchón MV,  
39  
40 626 Quinones D, et al. Quality of controlled clinical trials on glaucoma and  
41  
42 627 intraocular high pressure. *J Glaucoma* [Internet]. 2005 Jun [cited 2017 Nov  
43  
44 628 9];14(3):190–5. Available from:  
45  
46 629 <http://www.ncbi.nlm.nih.gov/pubmed/15870599>  
47  
48 630 32. Haahr MT, Hróbjartsson A. Who is blinded in randomized clinical trials? A study  
49  
50 631 of 200 trials and a survey of authors. *Clin Trials* [Internet]. 2006;3(4):360–5.  
51  
52 632 Available from: <http://www.ncbi.nlm.nih.gov/pubmed/17060210>  
53  
54  
55 633 33. Kober T, Trelle S, Engert A. Reporting of randomized controlled trials in Hodgkin  
56  
57 634 lymphoma in biomedical journals. *J Natl Cancer Inst* [Internet]. 2006 May 3  
58  
59 635 [cited 2017 Feb 24];98(9):620–5. Available from:  
60

- 1  
2  
3 636 <http://www.ncbi.nlm.nih.gov/pubmed/16670387>  
4  
5  
6 637 34. Biondi-Zoccai GGL, Lotrionte M, Abbate A, Testa L, Remigi E, Burzotta F, et al.  
7  
8 638 Compliance with QUOROM and quality of reporting of overlapping meta-  
9  
10 639 analyses on the role of acetylcysteine in the prevention of contrast associated  
11  
12 640 nephropathy: case study. *BMJ* [Internet]. 2006 Jan 28 [cited 2017 Nov  
13  
14 641 9];332(7535):202–9. Available from:  
15  
16 642 <http://www.bmj.com/cgi/doi/10.1136/bmj.38693.516782.7C>  
17  
18 643 35. Balasubramanian SP, Wiener M, Alshameeri Z, Tiruvoipati R, Elbourne D, Reed  
19  
20 644 MW, et al. Standards of reporting of randomized controlled trials in general  
21  
22 645 surgery: Can we do better? *Ann Surg* [Internet]. 2006 Nov [cited 2017 Feb  
23  
24 646 24];244(5):663–7. Available from:  
25  
26 647 <http://www.ncbi.nlm.nih.gov/pubmed/17060756>  
27  
28 648 36. Dias S, McNamee R, Vail A, S. D, R. M, A. V, et al. Evidence of improving quality  
29  
30 649 of reporting of randomized controlled trials in subfertility. *Hum Reprod*  
31  
32 650 [Internet]. 2006 Oct [cited 2017 Feb 24];21(10):2617–27. Available from:  
33  
34 651 <http://www.ncbi.nlm.nih.gov/pubmed/16793995>  
35  
36 652 37. Smidt N, Rutjes AWS, van der Windt DAWM, Ostelo RWJG, Bossuyt PM, Reitsma  
37  
38 653 JB, et al. The quality of diagnostic accuracy studies since the STARD statement:  
39  
40 654 Has it improved? *Neurology* [Internet]. 2006 Sep 12 [cited 2018 Mar  
41  
42 655 12];67(5):792–7. Available from:  
43  
44 656 <http://www.ncbi.nlm.nih.gov/pubmed/16966539>  
45  
46 657 38. Coppus SFPJ, van der Veen F, Bossuyt PMM, Mol BWJ, S.F.P.J. C, F. van der V, et  
47  
48 658 al. Quality of reporting of test accuracy studies in reproductive medicine: impact  
49  
50 659 of the Standards for Reporting of Diagnostic Accuracy (STARD) initiative. *Fertil*  
51  
52 660 *Steril* [Internet]. 2006 Nov [cited 2017 Jun 26];86(5):1321–9. Available from:  
53  
54 661 <http://www.embase.com/search/results?subaction=viewrecord&from=export&i>  
55  
56 662 [d=L44602037](http://www.embase.com/search/results?subaction=viewrecord&from=export&id=L44602037)  
57  
58 663 39. Tiruvoipati R, Balasubramanian SP, Atturu G, Peek GJ, Elbourne D. Improving the  
59  
60

- 1  
2  
3 664 quality of reporting randomized controlled trials in cardiothoracic surgery: the  
4 way forward. *J Thorac Cardiovasc Surg* [Internet]. 2006 Aug [cited 2017 Jul  
5 665 21];132(2):233–40. Available from:  
6  
7 666  
8  
9 667 <http://www.ncbi.nlm.nih.gov/pubmed/16872940>
- 10  
11 668 40. Mahoney J, Ellison J. Assessing the quality of glucose monitor studies: a critical  
12 evaluation of published reports. *Clin Chem* [Internet]. 2007 Jun 19 [cited 2017  
13 669 Nov 9];53(6):1122–8. Available from:  
14  
15 670  
16  
17 671 <http://www.clinchem.org/cgi/doi/10.1373/clinchem.2006.083493>
- 18  
19  
20 672 41. Poolman RW, Abouali JAK, Conter HJ, Bhandari M. Overlapping systematic  
21 reviews of anterior cruciate ligament reconstruction comparing hamstring  
22 673 autograft with bone-patellar tendon-bone autograft: why are they different? *J*  
23 674 *Bone Joint Surg Am* [Internet]. 2007 Jul 1 [cited 2017 Nov 9];89(7):1542–52.  
24  
25 675 Available from: <http://jbj.org/cgi/doi/10.2106/JBJS.F.01292>  
26  
27 676
- 28  
29  
30 677 42. Spring B, Pagoto S, Knatterud G, Kozak A, Hedeker D. Examination of the analytic  
31 quality of behavioral health randomized clinical trials. *J Clin Psychol* [Internet].  
32 678 2007 Jan [cited 2017 Nov 9];63(1):53–71. Available from:  
33  
34 679  
35 680 <http://www.ncbi.nlm.nih.gov/pubmed/17115429>
- 36  
37  
38 681 43. Agha R, Cooper D, Muir G. The reporting quality of randomised controlled trials  
39 in surgery: A systematic review. *Int J Surg* [Internet]. 2007 Dec [cited 2017 Nov  
40 682 9];5(6):413–22. Available from:  
41  
42 683  
43 684 <http://www.ncbi.nlm.nih.gov/pubmed/18029237>
- 44  
45  
46 685 44. Kane RL, Wang J, Garrard J. Reporting in randomized clinical trials improved  
47 after adoption of the CONSORT statement. *J Clin Epidemiol* [Internet]. 2007 Mar  
48 686 [cited 2017 Nov 9];60(3):241–9. Available from:  
49  
50 687  
51 688 <http://linkinghub.elsevier.com/retrieve/pii/S0895435606002575>
- 52  
53  
54  
55 689 45. Paranjothy B, Shunmugam M, Azuara-Blanco A, B. P, M. S, A. A-B, et al. The  
56 quality of reporting of diagnostic accuracy studies in glaucoma using scanning  
57 690 laser polarimetry. *J Glaucoma* [Internet]. 2007 Dec [cited 2017 Feb  
58 691  
59  
60

- 1  
2  
3 692 24];16(8):670–5. Available from:  
4  
5 693 <http://www.ncbi.nlm.nih.gov/pubmed/18091453>  
6  
7  
8 694 46. Johnson ZK, Siddiqui MAR, Azuara-Blanco A, Z.K. J, M.A.R. S, A. A-B, et al. The  
9  
10 695 Quality of Reporting of Diagnostic Accuracy Studies of Optical Coherence  
11  
12 696 Tomography in Glaucoma. *Ophthalmology* [Internet]. 2007 Sep [cited 2017 Feb  
13  
14 697 24];114(9):1607–12. Available from:  
15  
16 698 <http://www.ncbi.nlm.nih.gov/pubmed/17434589>  
17  
18 699 47. Riveros C, Dechartres A, Perrodeau E, Haneef R, Boutron I, Ravaud P. Timing and  
19  
20 700 Completeness of Trial Results Posted at ClinicalTrials.gov and Published in  
21  
22 701 Journals. Dickersin K, editor. *PLoS Med* [Internet]. 2013 Dec 3 [cited 2018 Nov  
23  
24 702 19];10(12):e1001566. Available from:  
25  
26 703 <https://dx.plos.org/10.1371/journal.pmed.1001566>  
27  
28 704 48. Hind D, Booth A. Do health technology assessments comply with QUOROM  
29  
30 705 diagram guidance? An empirical study. *BMC Med Res Methodol* [Internet]. 2007  
31  
32 706 Nov 20 [cited 2017 Jul 17];7:49. Available from:  
33  
34 707 <http://www.ncbi.nlm.nih.gov/pubmed/18021461>  
35  
36 708 49. Lee PE, Fischer HD, Rochon PA, Gill SS, Herrmann N, Bell CM, et al. Published  
37  
38 709 randomized controlled trials of drug therapy for dementia often lack complete  
39  
40 710 data on harm. *J Clin Epidemiol* [Internet]. 2008 Nov [cited 2017 Nov  
41  
42 711 22];61(11):1152–60. Available from:  
43  
44 712 <http://linkinghub.elsevier.com/retrieve/pii/S0895435607004829>  
45  
46 713 50. Pat K, Doms C, Vansteenkiste J, K. P, C. D, J. V, et al. Systematic review of  
47  
48 714 symptom control and quality of life in studies on chemotherapy for advanced  
49  
50 715 non-small cell lung cancer: How CONSORTed are the data? *Lung Cancer*  
51  
52 716 [Internet]. 2008 Oct [cited 2017 Mar 10];62(1):126–38. Available from:  
53  
54 717 <http://linkinghub.elsevier.com/retrieve/pii/S0169500208001062>  
55  
56 718 51. Folkes A, Urquhart R, Grunfeld E, A. F, R. U, E. G. Are leading medical journals  
57  
58 719 following their own policies on CONSORT reporting? *Contemp Clin Trials*  
59  
60

- 1  
2  
3 720 [Internet]. 2008 Nov [cited 2017 Jun 26];29(6):843–6. Available from:  
4  
5 721 <http://linkinghub.elsevier.com/retrieve/pii/S1551714408000906>  
6  
7  
8 722 52. Sinha S, Sinha S, Ashby E, Jayaram R, Grocott MPW. Quality of reporting in  
9  
10 723 randomized trials published in high-quality surgical journals. *J Am Coll Surg*  
11  
12 724 [Internet]. 2009 Nov [cited 2017 Jul 17];209(5):565–571.e1. Available from:  
13  
14 725 <http://linkinghub.elsevier.com/retrieve/pii/S107275150901151X>  
15  
16 726 53. Freeman K, Szczepura A, Osipenko L, K. F, A. S, L. O, et al. Non-invasive fetal RHD  
17  
18 727 genotyping tests: a systematic review of the quality of reporting of diagnostic  
19  
20 728 accuracy in published studies. *Eur J Obstet Gynecol Reprod Biol* [Internet]. 2009  
21  
22 729 Feb [cited 2017 Jun 26];142(2):91–8. Available from:  
23  
24 730 <http://linkinghub.elsevier.com/retrieve/pii/S0301211508003916>  
25  
26 731 54. Uetani K, Nakayama T, Ikai H, Yonemoto N, Moher D, K. U, et al. Quality of  
27  
28 732 reports on randomized controlled trials conducted in Japan: Evaluation of  
29  
30 733 adherence to the CONSORT statement. *Intern Med* [Internet]. 2009 [cited 2017  
31  
32 734 Feb 24];48(5):307–13. Available from:  
33  
34 735 <http://www.ncbi.nlm.nih.gov/pubmed/19252352>  
35  
36 736 55. Ethgen M, Boutron L, Steg PG, Roy C, Ravaud P, M. E, et al. Quality of reporting  
37  
38 737 internal and external validity data from randomized controlled trials evaluating  
39  
40 738 stents for percutaneous coronary intervention. *BMC Med Res Methodol*  
41  
42 739 [Internet]. 2009 Apr 9 [cited 2017 Feb 24];9(1):24. Available from:  
43  
44 740 <http://www.embase.com/search/results?subaction=viewrecord&from=export&i>  
45  
46 741 [d=L354667428](http://www.embase.com/search/results?subaction=viewrecord&from=export&i)  
47  
48 742 56. Krzych LJ, Liszka L. No improvement in studies reporting the diagnostic accuracy  
49  
50 743 of B-type natriuretic peptide. *Med Sci Monit* [Internet]. 2009 May [cited 2017  
51  
52 744 Nov 9];15(5):SR5-14. Available from:  
53  
54 745 <http://www.ncbi.nlm.nih.gov/pubmed/19396053>  
55  
56 746 57. Pagoto SL, Kozak AT, John P, Bodenlos JS, Hedeker D, Spring B, et al. Intention-  
57  
58 747 to-treat analyses in behavioral medicine randomized clinical trials. *Int J Behav*  
59  
60

- 1  
2  
3 748 Med [Internet]. 2009 Dec 25 [cited 2017 Feb 24];16(4):316–22. Available from:  
4  
5 749 <http://link.springer.com/10.1007/s12529-009-9039-3>  
6  
7  
8 750 58. Kidwell CS, Liebeskind DS, Starkman S, Saver JL. Trends in acute ischemic stroke  
9  
10 751 trials through the 20th century. Stroke [Internet]. 2001 Jun [cited 2017 Nov  
11  
12 752 9];32(6):1349–59. Available from:  
13  
14 753 <http://www.ncbi.nlm.nih.gov/pubmed/11387498>  
15  
16 754 59. Han C, Kwak K, Marks DM, Pae C-U, Wu L-T, Bhatia KS, et al. The impact of the  
17  
18 755 CONSORT statement on reporting of randomized clinical trials in psychiatry.  
19  
20 756 Contemp Clin Trials [Internet]. 2009 Mar [cited 2017 Jun 26];30(2):116–22.  
21  
22 757 Available from: <http://linkinghub.elsevier.com/retrieve/pii/S1551714408001511>  
23  
24 758 60. Alvarez F, Meyer N, Gourraud PA, Paul C, F. A, N. M, et al. CONSORT adoption  
25  
26 759 and quality of reporting of randomized controlled trials: a systematic analysis in  
27  
28 760 two dermatology journals. Br J Dermatol [Internet]. 2009 Nov [cited 2017 Feb  
29  
30 761 23];161(5):1159–65. Available from:  
31  
32 762 [http://www.embase.com/search/results?subaction=viewrecord&from=export&](http://www.embase.com/search/results?subaction=viewrecord&from=export&d=L355782314)  
33  
34 763 [d=L355782314](http://www.embase.com/search/results?subaction=viewrecord&from=export&d=L355782314)  
35  
36 764 61. Wei X, Tiejun L, Cheng W. Current situation on the reporting quality of  
37  
38 765 randomized controlled trials in 5 leading Chinese medical journals. J Med Coll  
39  
40 766 PLA [Internet]. 2009 Apr [cited 2018 Mar 12];24(2):105–11. Available from:  
41  
42 767 <http://linkinghub.elsevier.com/retrieve/pii/S1000194809600253>  
43  
44  
45 768 62. Ladd BO, McCrady BS, Manuel JK, Campbell W, B.O. L, B.S. M, et al. Improving  
46  
47 769 the quality of reporting alcohol outcome studies: Effects of the CONSORT  
48  
49 770 statement. Addict Behav [Internet]. 2010 Jul [cited 2017 Feb 24];35(7):660–6.  
50  
51 771 Available from: <http://linkinghub.elsevier.com/retrieve/pii/S0306460310000560>  
52  
53 772 63. Yu L-M, Chan A-W, Hopewell S, Deeks JJ, Altman DG. Reporting on covariate  
54  
55 773 adjustment in randomised controlled trials before and after revision of the 2001  
56  
57 774 CONSORT statement: a literature review. Trials [Internet]. 2010 May 18 [cited  
58  
59 775 2017 Nov 9];11(1):59. Available from:  
60

- 1  
2  
3 776 <http://trialsjournal.biomedcentral.com/articles/10.1186/1745-6215-11-59>  
4  
5  
6 777 64. Areia M, Soares M, Dinis-Ribeiro M. Quality reporting of endoscopic diagnostic  
7  
8 778 studies in gastrointestinal journals: where do we stand on the use of the STARD  
9  
10 779 and CONSORT statements? *Endoscopy* [Internet]. 2010 Feb 5 [cited 2017 Nov  
11  
12 780 9];42(2):138–47. Available from: [http://www.thieme-](http://www.thieme-connect.de/DOI/DOI?10.1055/s-0029-1243846)  
13  
14 781 [connect.de/DOI/DOI?10.1055/s-0029-1243846](http://www.thieme-connect.de/DOI/DOI?10.1055/s-0029-1243846)  
15  
16 782 65. Delaney M, Meyer E, Cserti-Gazdewich C, Haspel RL, Lin Y, Morris A, et al. A  
17  
18 783 systematic assessment of the quality of reporting for platelet transfusion  
19  
20 784 studies. *Transfusion* [Internet]. 2010 Oct [cited 2017 Jun 26];50(10):2135–44.  
21  
22 785 Available from: <http://doi.wiley.com/10.1111/j.1537-2995.2010.02691.x>  
23  
24 786 66. Flint HE, Harrison JE. How well do reports of clinical trials in the orthodontic  
25  
26 787 literature comply with the CONSORT statement? *J Orthod* [Internet]. 2010 Dec  
27  
28 788 16 [cited 2017 Feb 24];37(4):250–61. Available from:  
29  
30 789 <http://www.tandfonline.com/doi/full/10.1179/14653121043191>  
31  
32  
33 790 67. Hopewell S, Dutton S, Yu L-M, Chan A-W, Altman DG, S. H, et al. The quality of  
34  
35 791 reports of randomised trials in 2000 and 2006: comparative study of articles  
36  
37 792 indexed in PubMed. *BMJ* [Internet]. 2010 Mar 23 [cited 2017 Jun 26];340(mar23  
38  
39 793 1):c723. Available from:  
40  
41 794 [http://www.embase.com/search/results?subaction=viewrecord&from=export&i](http://www.embase.com/search/results?subaction=viewrecord&from=export&id=L358557565)  
42  
43 795 [d=L358557565](http://www.embase.com/search/results?subaction=viewrecord&from=export&id=L358557565)  
44  
45 796 68. Ernst E, Hung SK CY. NCCAM-funded RCTs of herbal medicines: An independent,  
46  
47 797 critical assessment. *Perfusion* [Internet]. 2011;24:89–102. Available from:  
48  
49 798 [https://www.researchgate.net/publication/288438592\\_NCCAM-](https://www.researchgate.net/publication/288438592_NCCAM-funded_RCTs_of_herbal_medicines_An_independent_critical_assessment)  
50  
51 799 [funded\\_RCTs\\_of\\_herbal\\_medicines\\_An\\_independent\\_critical\\_assessment](https://www.researchgate.net/publication/288438592_NCCAM-funded_RCTs_of_herbal_medicines_An_independent_critical_assessment)  
52  
53 800 69. Sánchez-Thorin JC, Cortés MC, Montenegro M, Villate N, J.C. S-T, M.C. C, et al.  
54  
55 801 The quality of reporting of randomized clinical trials published in  
56  
57 802 *Ophthalmology*. *Ophthalmology* [Internet]. 2001 Feb [cited 2017 Feb  
58  
59 803 24];108(2):410–5. Available from:



- 1  
2  
3 804 <http://www.embase.com/search/results?subaction=viewrecord&from=export&i>  
4  
5 805 [d=L32115976](http://www.embase.com/search/results?subaction=viewrecord&from=export&i)  
6  
7  
8 806 70. Selman TJ, Morris RK, Zamora J, Khan KS. The quality of reporting of primary test  
9  
10 807 accuracy studies in obstetrics and gynaecology: application of the STARD  
11  
12 808 criteria. *BMC Womens Health* [Internet]. 2011 Mar 23 [cited 2017 Jul  
13  
14 809 17];11(1):8. Available from:  
15  
16 810 <http://bmcwomenshealth.biomedcentral.com/articles/10.1186/1472-6874-11-8>  
17  
18 811 71. Parsons NR, Hiskens R, Price CL, Achten J, Costa ML, N.R. P, et al. A systematic  
19  
20 812 survey of the quality of research reporting in general orthopaedic journals. *J*  
21  
22 813 *Bone Jt Surg - Ser B* [Internet]. 2011 Sep 1 [cited 2017 Feb 24];93 B(9):1154–9.  
23  
24 814 Available from: <http://www.bjj.boneandjoint.org.uk/cgi/doi/10.1302/0301->  
25  
26 815 [620X.93B9.27193](http://www.bjj.boneandjoint.org.uk/cgi/doi/10.1302/0301-)  
27  
28 816 72. Kiehna EN, Starke RM, Pouratian N, Dumont AS. Standards for reporting  
29  
30 817 randomized controlled trials in neurosurgery. *J Neurosurg* [Internet]. 2011 Feb  
31  
32 818 [cited 2017 Feb 24];114(2):280–5. Available from:  
33  
34 819 <http://thejns.org/doi/10.3171/2010.8.JNS091770>  
35  
36 820 73. Strech D, Soltmann B, Weikert B, Bauer M, Pfennig A, D. S, et al. Quality of  
37  
38 821 reporting of randomized controlled trials of pharmacologic treatment of bipolar  
39  
40 822 disorders: A systematic review. *J Clin Psychiatry* [Internet]. 2011 Sep 15 [cited  
41  
42 823 2017 Feb 24];72(9):1214–21. Available from:  
43  
44 824 <http://article.psychiatrist.com/?ContentType=START&ID=10007267>  
45  
46 825 74. Turner L-A, Singh K, Garritty C, Tsertsvadze A, Manheimer E, Wieland LS, et al.  
47  
48 826 An evaluation of the completeness of safety reporting in reports of  
49  
50 827 complementary and alternative medicine trials. *BMC Complement Altern Med*  
51  
52 828 [Internet]. 2011 Aug 22 [cited 2017 Jun 26];11(1):67. Available from:  
53  
54 829 <http://bmccomplementalmed.biomedcentral.com/articles/10.1186/1472->  
55  
56 830 [6882-11-67](http://bmccomplementalmed.biomedcentral.com/articles/10.1186/1472-)  
57  
58 831 75. Haidich A-B, Birtsou C, Dardavessis T, Tirodimos I, Arvanitidou M, A.-B. H, et al.  
59  
60

- 1  
2  
3 832 The quality of safety reporting in trials is still suboptimal: survey of major  
4 general medical journals. *J Clin Epidemiol* [Internet]. 2011 Feb [cited 2017 Feb  
5 833 24];64(2):124–35. Available from:  
6  
7 834  
8  
9 835 <http://linkinghub.elsevier.com/retrieve/pii/S0895435610001083>
- 10  
11 836 76. Gray R, Sullivan M, Altman DG, Gordon-Weeks AN, R. G, M. S, et al. Adherence  
12 of trials of operative intervention to the CONSORT statement extension for  
13 837 nonpharmacological treatments: A comparative before and after study. *Ann R*  
14 838 *Coll Surg Engl* [Internet]. 2012 Sep 1 [cited 2017 Feb 24];94(6):388–94. Available  
15 839 from: [http://openurl.ingenta.com/content/xref?genre=article&issn=0035-](http://openurl.ingenta.com/content/xref?genre=article&issn=0035-8843&volume=94&issue=6&spage=388)  
16 840 [8843&volume=94&issue=6&spage=388](http://openurl.ingenta.com/content/xref?genre=article&issn=0035-8843&volume=94&issue=6&spage=388)  
17 841
- 18  
19 842 77. Cornelius VR, Sauzet O, Williams JE, Ayis S, Farquhar-Smith P, Ross JR, et al.  
20 Adverse event reporting in randomised controlled trials of neuropathic pain:  
21 843 considerations for future practice. *Pain* [Internet]. 2013 Feb [cited 2017 Nov  
22 844 22];154(2):213–20. Available from:  
23 845 [http://content.wkhealth.com/linkback/openurl?sid=WKPTLP:landingpage&an=0](http://content.wkhealth.com/linkback/openurl?sid=WKPTLP:landingpage&an=0006396-201302000-00009)  
24 846 [0006396-201302000-00009](http://content.wkhealth.com/linkback/openurl?sid=WKPTLP:landingpage&an=0006396-201302000-00009)  
25 847
- 26  
27 848 78. Diaz-Ordaz K, Froud R, Sheehan B, Eldridge S. A systematic review of cluster  
28 randomised trials in residential facilities for older people suggests how to  
29 849 improve quality. *BMC Med Res Methodol* [Internet]. 2013 Oct 22 [cited 2017 Jul  
30 850 17];13(1):127. Available from:  
31 851 [http://bmcmmedresmethodol.biomedcentral.com/articles/10.1186/1471-2288-](http://bmcmmedresmethodol.biomedcentral.com/articles/10.1186/1471-2288-13-127)  
32 852 [13-127](http://bmcmmedresmethodol.biomedcentral.com/articles/10.1186/1471-2288-13-127)  
33 853
- 34  
35 854 79. Geha NN, Moseley AM, Elkins MR, Chiavegato LD, Shiwa SR, Costa LOP. The  
36 quality and reporting of randomized trials in cardiothoracic physical therapy  
37 849 could be substantially improved. *Respir Care* [Internet]. 2013 Nov;58(11):1899–  
38 850 906. Available from: <http://rc.rcjournal.com/cgi/doi/10.4187/respcare.02379>  
39 851  
40 852  
41 853  
42  
43 854 80. Moher D, Jones A, Lepage L, CONSORT Group (Consolidated Standards for  
44 Reporting of Trials). Use of the CONSORT statement and quality of reports of  
45 855 randomized trials: a comparative before-and-after evaluation. *JAMA* [Internet].  
46 856  
47 857  
48 858  
49 859  
50 860

- 1  
2  
3 861 2001 Apr 18 [cited 2017 Jun 7];285(15):1992–5. Available from:  
4  
5 862 <http://www.ncbi.nlm.nih.gov/pubmed/11308436>  
6  
7  
8 863 81. Liu LQ, Morris PJ, Pengel LHM, L.Q. L, P.J. M, L.H.M. P, et al. Compliance to the  
9  
10 864 CONSORT statement of randomized controlled trials in solid organ  
11  
12 865 transplantation: A 3-year overview. *Transpl Int* [Internet]. 2013 Mar [cited 2017  
13  
14 866 Feb 24];26(3):300–6. Available from:  
15  
16 867 <http://www.embase.com/search/results?subaction=viewrecord&from=export&i>  
17 868 [d=L52379666](http://www.embase.com/search/results?subaction=viewrecord&from=export&id=L52379666)  
18  
19  
20 869 82. Panic N, Leoncini E, de Belvis G, Ricciardi W, Boccia S, N. P, et al. Evaluation of  
21  
22 870 the endorsement of the preferred reporting items for systematic reviews and  
23  
24 871 meta-analysis (PRISMA) statement on the quality of published systematic review  
25  
26 872 and meta-analyses. Derrick GE, editor. *PLoS One* [Internet]. 2013 Dec 26 [cited  
27  
28 873 2017 Jan 15];8(12):e83138. Available from:  
29  
30 874 <http://www.embase.com/search/results?subaction=viewrecord&from=export&i>  
31 875 [d=L372005920](http://www.embase.com/search/results?subaction=viewrecord&from=export&id=L372005920)  
32  
33  
34 876 83. Fleming PS, Seehra J, Polychronopoulou A, Fedorowicz Z, Pandis N. A PRISMA  
35  
36 877 assessment of the reporting quality of systematic reviews in orthodontics. *Angle*  
37  
38 878 *Orthod* [Internet]. 2013 Jan [cited 2017 Nov 9];83(1):158–63. Available from:  
39  
40 879 <http://www.ncbi.nlm.nih.gov/pubmed/22720835>  
41  
42  
43 880 84. Péron J, Maillet D, Gan HK, Chen EX, You B, J. P, et al. Adherence to CONSORT  
44  
45 881 adverse event reporting guidelines in randomized clinical trials evaluating  
46  
47 882 systemic cancer therapy: A systematic review. *J Clin Oncol* [Internet]. 2013 Nov  
48  
49 883 1 [cited 2017 Feb 24];31(31):3957–63. Available from:  
50  
51 884 <http://ascopubs.org/doi/10.1200/JCO.2013.49.3981>  
52  
53  
54 885 85. Tunis AS, McInnes MDF, Hanna R, Esmail K. Association of Study Quality with  
55  
56 886 Completeness of Reporting: Have Completeness of Reporting and Quality of  
57  
58 887 Systematic Reviews and Meta-Analyses in Major Radiology Journals Changed  
59  
60 888 Since Publication of the PRISMA Statement? *Radiology* [Internet]. 2013 Nov  
889  
890 [cited 2018 Mar 12];269(2):413–26. Available from:

- 1  
2  
3 890 <http://pubs.rsna.org/doi/10.1148/radiol.13130273>  
4  
5  
6 891 86. Maclean EN, Stone IS, Ceelen F, Garcia-Albeniz X, Sommer WH, Petersen SE.  
7  
8 892 Quality of reporting in cardiac MRI, CT and SPECT diagnostic accuracy studies:  
9  
10 893 Analysis of the impact of STARD criteria. *J Cardiovasc Magn Reson* [Internet].  
11  
12 894 2013 Jun 1 [cited 2017 Feb 24];15(6):61. Available from:  
13  
14 895 [http://www.embase.com/search/results?subaction=viewrecord&from=export&i](http://www.embase.com/search/results?subaction=viewrecord&from=export&id=L70993941)  
15 896 [d=L70993941](http://www.embase.com/search/results?subaction=viewrecord&from=export&id=L70993941)  
16  
17  
18 897 87. Baker D, Lidster K, Sottomayor A, Amor S. Two Years Later: Journals Are Not Yet  
19  
20 898 Enforcing the ARRIVE Guidelines on Reporting Standards for Pre-Clinical Animal  
21  
22 899 Studies. Eisen JA, editor. *PLoS Biol* [Internet]. 2014 Jan 7 [cited 2017 Sep  
23  
24 900 29];12(1):e1001756. Available from:  
25  
26 901 <http://www.ncbi.nlm.nih.gov/pubmed/24409096>  
27  
28 902 88. Choi J, Jun JH, Kang BK, Kim KH, Lee MS, J. C, et al. Endorsement for improving  
29  
30 903 the quality of reports on randomized controlled trials of traditional medicine  
31  
32 904 journals in Korea: a systematic review. *Trials* [Internet]. 2014 Nov 5 [cited 2017  
33  
34 905 Jan 15];15(1):429. Available from:  
35  
36 906 <http://trialsjournal.biomedcentral.com/articles/10.1186/1745-6215-15-429>  
37  
38 907 89. Walther S, Schueler S, Tackmann R, Schuetz GM, Schlattmann P, Dewey M, et al.  
39  
40 908 Compliance with STARD checklist among studies of coronary CT angiography:  
41  
42 909 systematic review. *Radiology* [Internet]. 2014 Apr [cited 2017 Feb  
43  
44 910 23];271(1):74–86. Available from:  
45  
46 911 <http://pubs.rsna.org/doi/10.1148/radiol.13121720>  
47  
48 912 90. Ghimire S, Kyung E, Lee H, Kim E. Oncology trial abstracts showed suboptimal  
49  
50 913 improvement in reporting: a comparative before-and-after evaluation using  
51  
52 914 CONSORT for Abstract guidelines. *J Clin Epidemiol* [Internet]. 2014 Jun [cited  
53  
54 915 2017 Feb 24];67(6):658–66. Available from:  
55  
56 916 <http://linkinghub.elsevier.com/retrieve/pii/S0895435613004435>  
57  
58 917 91. Devereaux PJ, Manns BJ, Ghali WA, Quan H, Guyatt GH, P.J. D, et al. The  
59  
60

- 1  
2  
3 918 reporting of methodological factors in randomized controlled trials and the  
4  
5 919 association with a journal policy to promote adherence to the Consolidated  
6  
7 920 Standards of Reporting Trials (CONSORT) checklist. *Control Clin Trials* [Internet].  
8  
9 921 2002 Aug [cited 2017 Feb 24];23(4):380–8. Available from:  
10  
11 922 <http://www.embase.com/search/results?subaction=viewrecord&from=export&i>  
12  
13 923 [d=L34874890](http://www.embase.com/search/results?subaction=viewrecord&from=export&i)
- 14  
15 924 92. Song T-J, Leng H-F, Zhong LL, Wu T-X, Bian Z-X. CONSORT in China: past  
16  
17 925 development and future direction. *Trials* [Internet]. 2015 Jun 1 [cited 2017 Jun  
18  
19 926 26];16(1):243. Available from:  
20  
21 927 <http://trialsjournal.biomedcentral.com/articles/10.1186/s13063-015-0769-z>
- 22  
23 928 93. Stevely A, Dimairo M, Todd S, Julious SA, Nicholl J, Hind D, et al. An Investigation  
24  
25 929 of the Shortcomings of the CONSORT 2010 Statement for the Reporting of  
26  
27 930 Group Sequential Randomised Controlled Trials: A Methodological Systematic  
28  
29 931 Review. Shamji M, editor. *PLoS One* [Internet]. 2015 Nov 3 [cited 2017 Feb  
30  
31 932 24];10(11):e0141104. Available from:  
32  
33 933 <http://dx.plos.org/10.1371/journal.pone.0141104>
- 34  
35 934 94. Adie S, Ma D, Harris IA, Naylor JM, Craig JC, S. A, et al. Quality of conduct and  
36  
37 935 reporting of meta-analyses of surgical interventions. *Ann Surg* [Internet]. 2015  
38  
39 936 Apr [cited 2017 Jun 26];261(4):685–94. Available from:  
40  
41 937 <http://content.wkhealth.com/linkback/openurl?sid=WKPTLP:landingpage%7B&>  
42  
43 938 [%7Dan=00000658-201504000-00012](http://content.wkhealth.com/linkback/openurl?sid=WKPTLP:landingpage%7B&)
- 44  
45 939 95. Jull A, Aye PS. Endorsement of the CONSORT guidelines, trial registration, and  
46  
47 940 the quality of reporting randomised controlled trials in leading nursing journals:  
48  
49 941 A cross-sectional analysis. *Int J Nurs Stud* [Internet]. 2015 Jun [cited 2017 Feb  
50  
51 942 10];52(6):1071–9. Available from:  
52  
53 943 <http://linkinghub.elsevier.com/retrieve/pii/S0020748914003022>
- 54  
55 944 96. Bearn DR, Alharbi F. Reporting of clinical trials in the orthodontic literature from  
56  
57 945 2008 to 2012: observational study of published reports in four major journals. *J*  
58  
59 946 *Orthod* [Internet]. 2015 Sep 15 [cited 2017 Feb 24];42(3):186–91. Available

- 1  
2  
3 947 from: <http://www.tandfonline.com/doi/full/10.1179/1465313315Y.0000000011>  
4  
5  
6 948 97. Agha RA, Fowler AJ, Limb C, Whitehurst K, Coe R, Sagoo H, et al. Impact of the  
7  
8 949 mandatory implementation of reporting guidelines on reporting quality in a  
9  
10 950 surgical journal: A before and after study. *Int J Surg* [Internet]. 2016 Jun [cited  
11  
12 951 2017 Feb 20];30:169–72. Available from:  
13  
14 952 <http://linkinghub.elsevier.com/retrieve/pii/S1743919116300620>  
15  
16 953 98. Pouwels KB, Widyakusuma NN, Groenwold RHH, Hak E. Quality of reporting of  
17  
18 954 confounding remained suboptimal after the STROBE guideline. *J Clin Epidemiol*  
19  
20 955 [Internet]. 2016 Jan [cited 2017 Feb 24];69:217–24. Available from:  
21  
22 956 <http://linkinghub.elsevier.com/retrieve/pii/S0895435615003856>  
23  
24 957 99. Rao A, Brück K, Methven S, Evans R, Stel VS, Jager KJ, et al. Quality of reporting  
25  
26 958 and study design of CKD cohort studies assessing mortality in the elderly before  
27  
28 959 and after STROBE: A systematic review. Zhou X, editor. *PLoS One* [Internet].  
29  
30 960 2016 May 11 [cited 2017 Jun 26];11(5):e0155078. Available from:  
31  
32 961 <http://dx.plos.org/10.1371/journal.pone.0155078>  
33  
34 962 100. Grob ATM, van der Vaart LR, Withagen MIJ, van der Vaart CH. The quality of  
35  
36 963 reporting of diagnostic accuracy studies in pelvic floor transperineal three-  
37  
38 964 dimensional ultrasound: a systematic review. *Ultrasound Obstet Gynecol*  
39  
40 965 [Internet]. 2016 Dec 21 [cited 2017 Mar 10]; Available from:  
41  
42 966 <http://doi.wiley.com/10.1002/uog.17390>  
43  
44  
45 967 101. Rikos D, Dardiotis E, Tsigoulis G, Zintzaras E, Hadjigeorgiou GM, D. R, et al.  
46  
47 968 Reporting quality of randomized-controlled trials in multiple sclerosis from 2000  
48  
49 969 to 2015, based on CONSORT statement. *Mult Scler Relat Disord* [Internet]. 2016  
50  
51 970 Sep [cited 2017 Feb 24];9:135–9. Available from:  
52  
53 971 <http://linkinghub.elsevier.com/retrieve/pii/S2211034816301225>  
54  
55 972 102. Montori VM, Bhandari M, Devereaux PJ, Manns BJ, Ghali WA, Guyatt GH. In the  
56  
57 973 dark: the reporting of blinding status in randomized controlled trials. *J Clin*  
58  
59 974 *Epidemiol* [Internet]. 2002 Aug [cited 2017 Nov 9];55(8):787–90. Available from:

- 1  
2  
3 975 <http://www.ncbi.nlm.nih.gov/pubmed/12384193>  
4  
5  
6 976 103. Bigna JJR, Um LN, Nansseu JRN, J.J.R. B, L.N. U, J.R.N. N. A comparison of quality  
7  
8 977 of abstracts of systematic reviews including meta-analysis of randomized  
9  
10 978 controlled trials in high-impact general medicine journals before and after the  
11  
12 979 publication of PRISMA extension for abstracts: A systematic review and m. Syst  
13  
14 980 Rev [Internet]. 2016 Oct 13 [cited 2017 Jun 26];5(1):174. Available from:  
15  
16 981 <http://www.embase.com/search/results?subaction=viewrecord&from=export&i>  
17  
18 982 [d=L612833923](http://www.embase.com/search/results?subaction=viewrecord&from=export&i)  
19  
20 983 104. Sarkis-Onofre R, Poletto-Neto V, Cenci MS, Pereira-Cenci T, Moher D. Impact of  
21  
22 984 the CONSORT Statement endorsement in the completeness of reporting of  
23  
24 985 randomized clinical trials in restorative dentistry. J Dent [Internet]. 2017 Mar 31  
25  
26 986 [cited 2017 Feb 24];58:54–9. Available from:  
27  
28 987 <http://linkinghub.elsevier.com/retrieve/pii/S0300571217300283>  
29  
30 988 105. Tharyan P, Premkumar TS, Mathew V, Barnabas JP, Manuelraj. Editorial policy  
31  
32 989 and the reporting of randomized controlled trials: a survey of instructions for  
33  
34 990 authors and assessment of trial reports in Indian medical journals (2004-05).  
35  
36 991 Natl Med J India [Internet]. [cited 2017 Nov 9];21(2):62–8. Available from:  
37  
38 992 <http://www.ncbi.nlm.nih.gov/pubmed/18807310>  
39  
40 993 106. Lai TYY, Wong VWY, Lam RF, Cheng ACO, Lam DSC, Leung GM. Quality of  
41  
42 994 reporting of key methodological items of randomized controlled trials in clinical  
43  
44 995 ophthalmic journals. Ophthalmic Epidemiol [Internet]. 14(6):390–8. Available  
45  
46 996 from: <http://www.ncbi.nlm.nih.gov/pubmed/18161613>  
47  
48 997 107. Cobo E, Selva-O’Callaghan A, Ribera JM, Cardellach F, Dominguez R, Vilardell M.  
49  
50 998 Statistical reviewers improve reporting in biomedical articles: A randomized  
51  
52 999 trial. PLoS One. 2007;2(3).  
53  
54  
55 1000 108. Implementing Reporting Guidelines: Why and How, for Journal Editors  
56  
57 1001 [Internet]. World Association of Medical Editors. Available from:  
58  
59 1002 <https://wame.blog/2017/09/17/implementing-reporting-guidelines-why-and->  
60

- 1  
2  
3 1003            how-for-journal-editors/  
4  
5  
6 1004    109.    Rupinski M, Zagorowicz E, Regula J, Fijuth J, Kraszewska E, Polkowski M, et al.  
7  
8 1005            Randomized Comparison of Three Palliative Regimens Including Brachytherapy,  
9  
10 1006            Photodynamic Therapy and APC in Patients With Malignant Dysphagia  
11  
12 1007            (CONSORT 1a) (Revised II). *Am J Gastroenterol* [Internet]. 2011 Sep 14 [cited  
13  
14 1008            2018 Mar 4];106(9):1612–20. Available from:  
15  
16 1009            <http://www.nature.com/articles/ajg2011178>  
17  
18 1010    110.    Jilka RL. The Road to Reproducibility in Animal Research. *J Bone Miner Res*  
19  
20 1011            [Internet]. 2016 Jul [cited 2017 Jul 21];31(7):1317–9. Available from:  
21  
22 1012            <http://doi.wiley.com/10.1002/jbmr.2881>  
23  
24 1013    111.    Moher D, Altman DG, Roberts I, Dirnagl U, Chalmers I, Berlin J. Four Proposals to  
25  
26 1014            Help Improve the Medical Research Literature. *PLOS Med* [Internet]. 2015 Sep  
27  
28 1015            22 [cited 2017 Aug 29];12(9):e1001864. Available from:  
29  
30 1016            <http://dx.plos.org/10.1371/journal.pmed.1001864>  
31  
32  
33 1017    112.    Pandis N, Turpin DL, N. P, D.L. T, Pandis N, Turpin DL. Enhancing CONSORT  
34  
35 1018            compliance for improved reporting of randomized controlled trials. *Am J Orthod*  
36  
37 1019            *Dentofac Orthop* [Internet]. 2014 Jan [cited 2017 Jul 21];145(1):1. Available  
38  
39 1020            from:  
40  
41 1021            [http://www.embase.com/search/results?subaction=viewrecord&from=export&i](http://www.embase.com/search/results?subaction=viewrecord&from=export&id=L372038916)  
42  
43 1022            [d=L372038916](http://www.embase.com/search/results?subaction=viewrecord&from=export&id=L372038916)  
44  
45 1023    113.    Hill CL, LaValley MP, Felson DT. Secular changes in the quality of published  
46  
47 1024            randomized clinical trials in rheumatology. *Arthritis Rheum* [Internet]. 2002 Mar  
48  
49 1025            [cited 2017 Nov 9];46(3):779–84. Available from:  
50  
51 1026            <http://doi.wiley.com/10.1002/art.512>  
52  
53 1027    114.    Hutton B, Salanti G, Caldwell DM, Chaimani A, Schmid CH, Cameron C, et al. The  
54  
55 1028            PRISMA extension statement for reporting of systematic reviews incorporating  
56  
57 1029            network meta-analyses of health care interventions: checklist and explanations.  
58  
59 1030            *Ann Intern Med* [Internet]. 2015 Jun 2 [cited 2017 Jun 26];162(11):777–84.  
60



- 1  
2  
3 1031 Available from: <http://annals.org/article.aspx?doi=10.7326/M14-2385>  
4  
5  
6 1032 115. Hirst A, Altman DG. Are peer reviewers encouraged to use reporting guidelines?  
7  
8 1033 A survey of 116 health research journals. Cameron DW, editor. PLoS One  
9  
10 1034 [Internet]. 2012 Apr 27 [cited 2017 Jun 7];7(4):e35621. Available from:  
11  
12 1035 <http://dx.plos.org/10.1371/journal.pone.0035621>  
13  
14 1036 116. ClinicalTrials.gov. National Library of Medicine (US). Available from:  
15  
16 1037 <https://clinicaltrials.gov/>  
17  
18  
19 1038 117. Pandis N, Shamseer L, Kokich VG, Fleming PS, Moher D, N. P, et al. Active  
20  
21 1039 implementation strategy of CONSORT adherence by a dental specialty journal  
22  
23 1040 improved randomized clinical trial reporting. J Clin Epidemiol [Internet]. 2014  
24  
25 1041 Sep [cited 2017 Jan 15];67(9):1044–8. Available from:  
26  
27 1042 <http://linkinghub.elsevier.com/retrieve/pii/S0895435614001140>  
28  
29 1043 118. Cobo E, Cortes J, Ribera JM, Cardellach F, Selva-O’Callaghan A, Kostov B, et al.  
30  
31 1044 Effect of using reporting guidelines during peer review on quality of final  
32  
33 1045 manuscripts submitted to a biomedical journal: masked randomised trial. 2011  
34  
35 1046 Nov;343(nov22 2). Available from:  
36  
37 1047 <http://www.ncbi.nlm.nih.gov/pubmed/22108262>  
38  
39 1048 119. Hopewell S, Boutron I, Altman DG, Barbour G, Moher D, Montori V, et al. Impact  
40  
41 1049 of a web-based tool (WebCONSORT) to improve the reporting of randomised  
42  
43 1050 trials: results of a randomised controlled trial. BMC Med [Internet]. 2016 Nov 28  
44  
45 1051 [cited 2017 Feb 24];14(1):199. Available from:  
46  
47 1052 <http://www.ncbi.nlm.nih.gov/pubmed/27894295>  
48  
49 1053 120. Hopewell S, Collins GS, Boutron I, Yu L-M, Cook J, Shanyinde M, et al. Impact of  
50  
51 1054 peer review on reports of randomised trials published in open peer review  
52  
53 1055 journals: retrospective before and after study. BMJ [Internet]. 2014 [cited 2017  
54  
55 1056 Jun 7];349. Available from: <http://www.bmj.com/content/349/bmj.g4145>  
56  
57  
58 1057 121. A peerless review? Automating methodological and statistical review. Available  
59  
60 1058 from: <https://blogs.biomedcentral.com/bmcblog/2016/05/23/peerless-review->

- 1  
2  
3 1059 automating-methodological-statistical-review/  
4  
5  
6 1060 122. Mbuagbaw L, Thabane M, Vanniyasingam T, Borg Debono V, Kosa S, Zhang S, et  
7  
8 1061 al. Improvement in the quality of abstracts in major clinical journals since  
9  
10 1062 CONSORT extension for abstracts: a systematic review. *Contemp Clin Trials*  
11  
12 1063 [Internet]. 2014 Jul [cited 2017 Feb 24];38(2):245–50. Available from:  
13  
14 1064 <http://linkinghub.elsevier.com/retrieve/pii/S1551714414000809>
- 15  
16 1065 123. Schriger DL, Altman DG. Inadequate post-publication review of medical  
17  
18 1066 research. *BMJ* [Internet]. 2010 Aug 11 [cited 2018 Mar 4];341:c3803. Available  
19  
20 1067 from: <http://www.ncbi.nlm.nih.gov/pubmed/20702543>
- 21  
22 1068 124. Statreviewer. Available from: <http://www.statreviewer.com/>
- 23  
24  
25 1069 125. Tools and templates for implementing reporting guidelines. Available from:  
26  
27 1070 [http://www.equator-network.org/toolkits/using-guidelines-in-journals/tools-](http://www.equator-network.org/toolkits/using-guidelines-in-journals/tools-and-templates-for-implementing-reporting-guidelines/)  
28  
29 1071 [and-templates-for-implementing-reporting-guidelines/](http://www.equator-network.org/toolkits/using-guidelines-in-journals/tools-and-templates-for-implementing-reporting-guidelines/)
- 30  
31  
32 1072 126. PubPeer. Available from: <https://pubpeer.com/>
- 33  
34  
35 1073 127. ScienceOpen. Available from: <https://www.scienceopen.com/>
- 36  
37  
38 1074 128. Péron J, You B, Gan HK, Maillet D, Chen EX, Pond GR, et al. Influence of  
39  
40 1075 statistician involvement on reporting of randomized clinical trials in medical  
41  
42 1076 oncology. *Anticancer Drugs* [Internet]. 2013 Mar [cited 2017 Feb 24];24(3):306–  
43  
44 1077 9. Available from:  
45  
46 1078 [http://content.wkhealth.com/linkback/openurl?sid=WKPTLP:landingpage&an=0](http://content.wkhealth.com/linkback/openurl?sid=WKPTLP:landingpage&an=0001813-201303000-00010)  
47  
48 1079 [0001813-201303000-00010](http://content.wkhealth.com/linkback/openurl?sid=WKPTLP:landingpage&an=0001813-201303000-00010)
- 49  
50 1080 129. Pandis N, Polychronopoulou A, Eliades T. An assessment of quality  
51  
52 1081 characteristics of randomised control trials published in dental journals. *J Dent*  
53  
54 1082 [Internet]. 2010 Sep [cited 2017 Feb 24];38(9):713–21. Available from:  
55  
56 1083 <http://linkinghub.elsevier.com/retrieve/pii/S0300571210001235>
- 57  
58 1084 130. Kloukos D, Papageorgiou SN, Doulis I, Petridis H, Pandis N. Reporting quality of  
59  
60 1085 randomised controlled trials published in prosthodontic and implantology

- 1  
2  
3 1086 journals. J Oral Rehabil [Internet]. 2015 Dec [cited 2017 Feb 24];42(12):914–25.  
4  
5 1087 Available from: <http://doi.wiley.com/10.1111/joor.12325>  
6  
7  
8 1088 131. Blanco D, Biggane AM, Cobo E. Are CONSORT checklists submitted by authors  
9 adequately reflecting what information is actually reported in published papers?  
10 1089 Trials [Internet]. 2018 Dec 29 [cited 2018 Jan 31];19(1):80. Available from:  
11 1090 <https://trialsjournal.biomedcentral.com/articles/10.1186/s13063-018-2475-0>  
12 1091  
13  
14  
15  
16 1092 132. Koletsi D, Fleming PS, Behrents RG, Lynch CD, Pandis N. The use of tailored  
17 subheadings was successful in enhancing compliance with CONSORT in a dental  
18 1093 journal. J Dent [Internet]. 2017 Dec [cited 2018 Mar 23];67:66–71. Available  
19 1094 from: <http://www.ncbi.nlm.nih.gov/pubmed/28941813>  
20 1095  
21  
22  
23  
24 1096 133. Cobo E, González JA. Taking advantage of unexpected WebCONSORT results.  
25 BMC Med [Internet]. 2016 Dec 5 [cited 2018 Feb 16];14(1):204. Available from:  
26 1097 <http://bmcmedicine.biomedcentral.com/articles/10.1186/s12916-016-0758-4>  
27 1098  
28  
29  
30  
31 1099 134. Tijdink JK, Schipper K, Bouter LM, Maclaine Pont P, de Jonge J, Smulders YM.  
32 How do scientists perceive the current publication culture? A qualitative focus  
33 1100 group interview study among Dutch biomedical researchers. BMJ Open  
34 1101 [Internet]. 2016 Feb 17 [cited 2017 Sep 28];6(2):e008681. Available from:  
35 1102 <http://bmjopen.bmj.com/lookup/doi/10.1136/bmjopen-2015-008681>  
36 1103  
37  
38  
39  
40  
41 1104  
42  
43

## 1105 **Figures, tables and supplementary files**

1106 **Figure 1:** PRISMA flow diagram.

1107 **Figure 2:** Typology of interventions to improve adherence to RGs according to type of  
1108 intervention and research stage. **Legend:** Evaluated interventions are shown in bold.

1109 **Figure 3:** Gaps in research on the evaluation of interventions to improve adherence to reporting  
1110 guidelines. **Legend:** Each circle represents one intervention. Variables displayed: 1) Circle size:  
1111 Number of studies evaluating each intervention (bigger = more studies); 2) Circle colour: Study  
1112 design of those studies (blue for RCTs and green for observational studies) and 3) Circle fill: Kind

1  
2  
3 1113 of RG implementation (plain for checklist and stripes for bullet points and examples). Research  
4 1114 gaps are highlighted in red.

6  
7 1115 **Table 1:** Rationale of the interventions identified.

9  
10 1116 **Supplementary file 1:** Description of the acronyms and full names of all reporting guidelines  
11 1117 considered.

13  
14 1118 **Supplementary file 2:** implementation details of the evaluated interventions.  
15  
16  
17  
18  
19  
20  
21  
22  
23  
24  
25  
26  
27  
28  
29  
30  
31  
32  
33  
34  
35  
36  
37  
38  
39  
40  
41  
42  
43  
44  
45  
46  
47  
48  
49  
50  
51  
52  
53  
54  
55  
56  
57  
58  
59  
60

For peer review only

1  
2  
3  
4  
5  
6  
7  
8  
9  
10  
11  
12  
13  
14  
15  
16  
17  
18  
19  
20  
21  
22  
23  
24  
25  
26  
27  
28  
29  
30  
31  
32  
33  
34  
35  
36  
37  
38  
39  
40  
41  
42  
43  
44  
45  
46  
47  
48  
49  
50  
51  
52  
53  
54  
55  
56  
57  
58  
59  
60

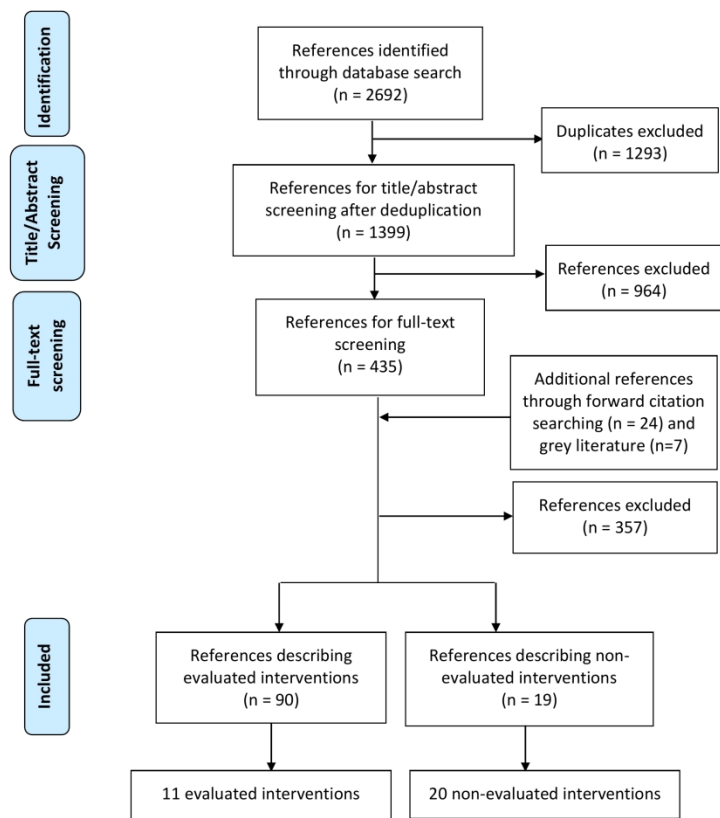

215x279mm (300 x 300 DPI)

|                             |                                                  |                                                                                                                                                                        |                                                                        |                                                                           |                                                                                   |                                                                                                        |                                                                                                                                                                                                                                                                                                                                               |                                                       |                                    |                             |                      |                         |                           |                              |                            |                     |                         |
|-----------------------------|--------------------------------------------------|------------------------------------------------------------------------------------------------------------------------------------------------------------------------|------------------------------------------------------------------------|---------------------------------------------------------------------------|-----------------------------------------------------------------------------------|--------------------------------------------------------------------------------------------------------|-----------------------------------------------------------------------------------------------------------------------------------------------------------------------------------------------------------------------------------------------------------------------------------------------------------------------------------------------|-------------------------------------------------------|------------------------------------|-----------------------------|----------------------|-------------------------|---------------------------|------------------------------|----------------------------|---------------------|-------------------------|
|                             | <b>TRAINING</b> on the practical use of RGs      | Introduction of RGs & journalology into graduate curricula (18-22)<br>Student's development of research protocols using RGs (21)                                       |                                                                        | Funder's support of author training on RGs (23)                           |                                                                                   | Training for peer reviewers and editors on RGs by journals (22,23)                                     |                                                                                                                                                                                                                                                                                                                                               |                                                       |                                    |                             |                      |                         |                           |                              |                            |                     |                         |
|                             | <b>Enhancing ACCESSIBILITY and UNDERSTANDING</b> | Dissemination of RGs by scientific associations (24)<br>Translation of RGs to further languages (25)<br>Development of expanded databases of examples for each RG (26) |                                                                        |                                                                           |                                                                                   |                                                                                                        |                                                                                                                                                                                                                                                                                                                                               |                                                       |                                    |                             |                      |                         |                           |                              |                            |                     |                         |
| <b>TYPE OF INTERVENTION</b> | <b>ENCOURAGING adherence</b>                     |                                                                                                                                                                        | Author use of RGs as a template for grant applications' proposals (21) | Required checklist for ethics approval application (11)                   | <b>Author use of the writing aid tool COBWEB (12)</b>                             | <b>Editorial statement endorsing certain RGs (27-46,48-106,113)</b>                                    | <b>Suggestion for peer reviewers to use RGs (107)</b>                                                                                                                                                                                                                                                                                         |                                                       |                                    |                             |                      |                         |                           |                              |                            |                     |                         |
|                             |                                                  |                                                                                                                                                                        |                                                                        |                                                                           | <b>Author use of a structured approach for reporting research (17,112)</b>        | <b>Recommendation or requirement to follow RGs in the "instructions to authors" (27-46,48-106,113)</b> |                                                                                                                                                                                                                                                                                                                                               |                                                       |                                    |                             |                      |                         |                           |                              |                            |                     |                         |
|                             |                                                  |                                                                                                                                                                        |                                                                        |                                                                           | Author markup of the manuscript to indicate where each RG item is addressed (109) | Journal development of core versions of RGs containing key items (110)                                 |                                                                                                                                                                                                                                                                                                                                               |                                                       |                                    |                             |                      |                         |                           |                              |                            |                     |                         |
|                             |                                                  |                                                                                                                                                                        |                                                                        |                                                                           | Funder's requirement of checklists in author's report (21,108)                    | Requirement to populate and submit a RG checklist with text from the manuscript (114)                  |                                                                                                                                                                                                                                                                                                                                               |                                                       |                                    |                             |                      |                         |                           |                              |                            |                     |                         |
|                             | <b>CHECKING adherence and providing FEEDBACK</b> |                                                                                                                                                                        |                                                                        |                                                                           |                                                                                   | Editor's questions to peer reviewers about whether the authors have followed RGs (115)                 |                                                                                                                                                                                                                                                                                                                                               |                                                       |                                    |                             |                      |                         |                           |                              |                            |                     |                         |
|                             | <b>InvolveMent of EXPERTS</b>                    |                                                                                                                                                                        |                                                                        | Medical writer involvement (108)<br>Statistician involvement (78,128-130) |                                                                                   |                                                                                                        | Completeness of reporting check by editors (117)<br>Peer review against RGs (118)<br>Internal peer review against RGs by a trained editorial assistant (120)<br>Implementation of the automatic tool StatReviewer (121)<br>Email to authors to revise the manuscript according to RGs (13)<br>Implementation of the web tool WebCONSORT (119) | Completeness of reporting check at copy-editing (122) | Post-publication peer review (123) |                             |                      |                         |                           |                              |                            |                     |                         |
|                             |                                                  |                                                                                                                                                                        |                                                                        |                                                                           |                                                                                   |                                                                                                        |                                                                                                                                                                                                                                                                                                                                               |                                                       |                                    | <b>EDUCATION</b>            | <b>GRANT WRITING</b> | <b>PROTOCOL WRITING</b> | <b>MANUSCRIPT WRITING</b> | <b>MANUSCRIPT SUBMISSION</b> | <b>JOURNAL PEER REVIEW</b> | <b>COPY-EDITING</b> | <b>POST-PUBLICATION</b> |
|                             |                                                  |                                                                                                                                                                        |                                                                        |                                                                           |                                                                                   |                                                                                                        |                                                                                                                                                                                                                                                                                                                                               |                                                       |                                    | <b>BEFORE STUDY CONDUCT</b> |                      |                         |                           |                              |                            |                     |                         |
|                             |                                                  |                                                                                                                                                                        |                                                                        |                                                                           |                                                                                   |                                                                                                        |                                                                                                                                                                                                                                                                                                                                               |                                                       |                                    | <b>AFTER STUDY CONDUCT</b>  |                      |                         |                           |                              |                            |                     |                         |
|                             |                                                  |                                                                                                                                                                        |                                                                        |                                                                           |                                                                                   |                                                                                                        |                                                                                                                                                                                                                                                                                                                                               |                                                       |                                    | <b>RESEARCH STAGE</b>       |                      |                         |                           |                              |                            |                     |                         |

Typology of interventions to improve adherence to RGs according to type of intervention and research stage.  
Legend: Evaluated interventions are shown in bold.

670x379mm (300 x 300 DPI)

1  
2  
3  
4  
5  
6  
7  
8  
9  
10  
11  
12  
13  
14  
15  
16  
17  
18  
19  
20  
21  
22  
23  
24  
25  
26  
27  
28  
29  
30  
31  
32  
33  
34  
35  
36  
37  
38  
39  
40  
41  
42  
43  
44  
45  
46  
47  
48  
49  
50  
51  
52  
53  
54  
55  
56  
57  
58  
59  
60

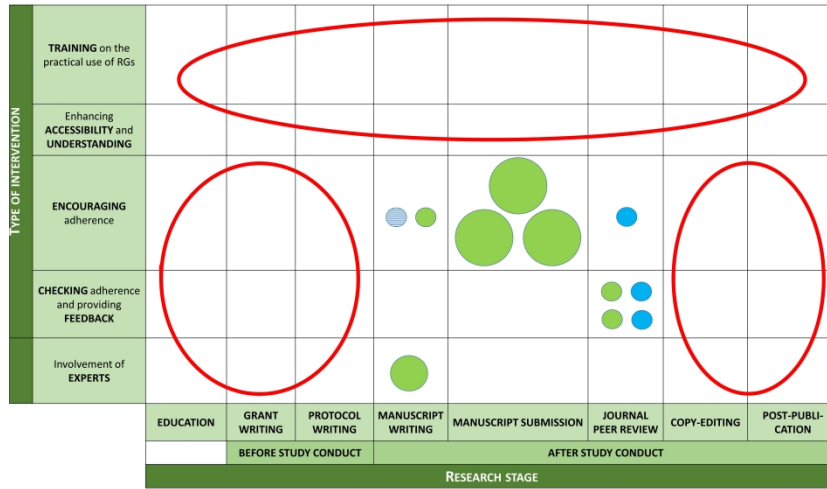

Gaps in research on the evaluation of interventions to improve adherence to reporting guidelines. Legend: Each circle represents one intervention. Variables displayed: 1) Circle size: Number of studies evaluating each intervention (bigger = more studies); 2) Circle colour: Study design of those studies (blue for RCTs and green for observational studies) and 3) Circle fill: Kind of RG implementation (plain for checklist and stripes for bullet points and examples). Research gaps are highlighted in red.

670x379mm (300 x 300 DPI)

| Acronym  | Full name                                                                                       |
|----------|-------------------------------------------------------------------------------------------------|
| CONSORT  | Consolidated Standards of Reporting Trials                                                      |
| STROBE   | Strengthening the Reporting of Observational Studies in Epidemiology                            |
| PRISMA   | Preferred Reporting Items for Systematic Reviews and Meta-Analyses                              |
| SRQR     | Standards for Reporting Qualitative Research                                                    |
| COREQ    | Consolidated criteria for Reporting Qualitative research                                        |
| STARD    | Standard Protocol Items: Recommendations for Interventional Trials                              |
| TRIPOD   | Transparent Reporting of a multivariable prediction model for Individual Prognosis or Diagnosis |
| SQUIRE   | Standards for Quality Improvement Reporting Excellence                                          |
| CHEERS   | Consolidated Health Economic Evaluation Reporting Standards                                     |
| SPIRIT   | Standard Protocol Items: Recommendations for Interventional Trials                              |
| PRISMA-P | Preferred Reporting Items for Systematic Review and Meta-Analysis Protocols                     |
| CARE     | Case Report                                                                                     |
| AGREE    | Appraisal of Guidelines, Research and Evaluation                                                |
| ARRIVE   | Animal Research: Reporting In Vivo Experiments                                                  |
| RIGHT    | Reporting Tool for Practice Guidelines in Health Care                                           |
| QUOROM   | Quality of Reporting of Meta-analyses                                                           |



| Type of intervention  | Intervention                                                                                | Number of studies and study design                                                                                                                                                                               | Details of the intervention                                                                                                                                                                                                                                 | RGs implemented                                                                                                                                                                                                                | Format of RG implementation          | Measure of adherence to RGs                                                                                                 | Effect on adherence to RGs*                                                                                                                                                   |
|-----------------------|---------------------------------------------------------------------------------------------|------------------------------------------------------------------------------------------------------------------------------------------------------------------------------------------------------------------|-------------------------------------------------------------------------------------------------------------------------------------------------------------------------------------------------------------------------------------------------------------|--------------------------------------------------------------------------------------------------------------------------------------------------------------------------------------------------------------------------------|--------------------------------------|-----------------------------------------------------------------------------------------------------------------------------|-------------------------------------------------------------------------------------------------------------------------------------------------------------------------------|
| Encouraging adherence | Implementation of the writing aid tool COBWEB (12)                                          | 1 RCT                                                                                                                                                                                                            | Participants have to write the six domains of the methods section of the manuscript for the protocol they receive. They have access to COBWEB tool for a random three of the six domains.                                                                   | CONSORT & CONSORT extension for non-pharmacological interventions                                                                                                                                                              | Bullet points and examples (6 items) | Mean score for completeness of reporting (scale 0–10, items weighted)                                                       | Difference of 2.1 (95% CI 1.5-2.7)                                                                                                                                            |
|                       | Author use of a structured approach for reporting research (47)                             | 1 Observational study (cross-sectional evaluation)                                                                                                                                                               | Results are posted in a standard tabular format without discussions or conclusions.                                                                                                                                                                         | CONSORT                                                                                                                                                                                                                        | Checklist (4 items)                  | Percentage compliance of each RG item                                                                                       | Difference of 0.16, 0.10, 0.18 and 0.36 for each of the 4 items considered                                                                                                    |
|                       | Journal endorsement (3 interventions, see "Details of the intervention") (27–46,48–106,113) | 80 observational studies (57 cross sectional evaluations of endorsing vs non-endorsing journals, 9 before and after evaluations of endorsing journals before and after endorsement, 14 both kind of evaluations) | A) Editorial statement endorsing certain RGs, B) Recommendation or requirement to follow RGs in the "Instructions to authors", and C) Requirement to submit a RG checklist together with the manuscript indicating page numbers corresponding to each item. | CONSORT (46 of 80)<br>CONSORT extensions (9 of 80)<br>QUOROM (3 of 80)<br>PRISMA (4 of 80)<br>PRISMA extensions (1 of 80)<br>STARD (11 of 80)<br>STROBE (4 of 80)<br>ARRIVE (1 of 80)<br>CONSORT, STROBE and PRISMA (11 of 80) | Checklist (all items)                | For CONSORT: percentage of compliance for each item**<br><br>For other RGs: Mean summed score for completeness of reporting | For CONSORT: 25 items improved (see details for each item on figure 2 on Turner et al. (6))<br><br>For CONSORT extension for harms: Difference of 0.04 (99% CI –1.50 to 1.58) |

|                                           |                                                      |                                                     |                                                                                                                                                                                                            |                        |                       |                                                                             |                                                                                                                                                                                                                                                                                    |
|-------------------------------------------|------------------------------------------------------|-----------------------------------------------------|------------------------------------------------------------------------------------------------------------------------------------------------------------------------------------------------------------|------------------------|-----------------------|-----------------------------------------------------------------------------|------------------------------------------------------------------------------------------------------------------------------------------------------------------------------------------------------------------------------------------------------------------------------------|
|                                           |                                                      |                                                     |                                                                                                                                                                                                            |                        |                       |                                                                             | <p>For PRISMA:<br/>Difference of 0.53<br/>(99% CI 0.02 to 1.03)</p> <p>For STARD:<br/>Difference of 0.52<br/>(99% CI -0.11 to 1.16)</p> <p>For STRICTA:<br/>Difference of 1.42<br/>(99% CI -0.04 to 2.88)</p> <p>For STROBE:<br/>Difference of 1.55<br/>(99% CI -3.19 to 6.29)</p> |
|                                           | Suggestion for peer reviewers to use RGs (107)       | 1 RCT                                               | Peer reviewers are sent a standard letter encouraging them to use different reporting guidelines. Reviewers are not asked to report whether they used the reporting guideline in reviewing the manuscript. | CONSORT, QUOROM, STARD | Checklist (all items) | Modified version of Manuscript Quality Assessment Instrument (scale 36-180) | Difference of 0.9<br>(95% CI -0.3 to +2.1)                                                                                                                                                                                                                                         |
| Checking adherence and providing feedback | Completeness of reporting check by the editors (117) | 1 Observational Study (Before and after evaluation) | Initial submissions are vetted by the editor-in-chief. If the submission is considered appropriate, manuscripts are assessed by the associate editor for CONSORT                                           | CONSORT                | Checklist (all items) | Percentage of compliance of each RG item                                    | Before – compliance ranges from 0% to 100% (Median 40%)                                                                                                                                                                                                                            |

1  
2  
3  
4  
5  
6  
7  
8  
9  
10  
11  
12  
13  
14  
15  
16  
17  
18  
19  
20  
21  
22  
23  
24  
25  
26  
27  
28  
29  
30  
31  
32  
33  
34  
35  
36  
37  
38  
39  
40  
41  
42  
43  
44  
45  
46

|  |                                                                                                  |                                                            |                                                                                                                                                                                                                   |                                   |                            |                                                                             |                                                  |
|--|--------------------------------------------------------------------------------------------------|------------------------------------------------------------|-------------------------------------------------------------------------------------------------------------------------------------------------------------------------------------------------------------------|-----------------------------------|----------------------------|-----------------------------------------------------------------------------|--------------------------------------------------|
|  |                                                                                                  |                                                            | adherence. Authors are asked to make changes accordingly until associate editor deems appropriate that they move to the next step of the review process leading to an editorial decision.                         |                                   |                            |                                                                             | After – perfect compliance in 33 out of 37 items |
|  | Additional review against RGs (118)                                                              | 1 RCT                                                      | A senior statistician does an additional review of all papers and provides authors suggestions on how to follow reporting guideline checklists.                                                                   | STROBE, CONSORT, STARD            | Checklist (all items)      | Modified version of Manuscript Quality Assessment Instrument (scale 1 to 9) | Difference of 0.25 (95% CI -0.05 to +0.54)       |
|  | Active implementation of RG by editors (2 interventions, see “Details of the intervention”) (13) | 1 Observational study (Interrupted time series evaluation) | A) Email is sent to authors to revise the abstract according to the guidelines at the revision stage and B) Changes are made by the assistant editors of these journals towards the end of the editorial process. | CONSORT extension for abstracts   | Checklist (9 of 17 items)  | Monthly mean number of items reported (scale 0 to 9)                        | Difference of 1.5 items                          |
|  | Implementation of the web-based tool WebCONSORT (119)                                            | 1 RCT                                                      | Journal editor includes a link to WebCONSORT in the revision letter to authors. Authors are directed to an automatically generated list of items and a flow diagram customised to their specific trial design.    | CONSORT & some CONSORT extensions | Checklist (10 of 25 items) | Percentage of items reported for each article                               | Difference of 0.04 (95% CI -0.02 to +0.10)       |

|                        |                                       |                                                       |                                                                                                                                       |         |                       |                                                                           |                                                                                                                                                                                                                                                               |
|------------------------|---------------------------------------|-------------------------------------------------------|---------------------------------------------------------------------------------------------------------------------------------------|---------|-----------------------|---------------------------------------------------------------------------|---------------------------------------------------------------------------------------------------------------------------------------------------------------------------------------------------------------------------------------------------------------|
| Involvement of experts | Statistician involvement (78,128-130) | 4 Observational studies (cross sectional evaluations) | Statisticians (or epidemiologists or other quantitative methodologists) are involved in the design, conduct or reporting of the study | CONSORT | Checklist (all items) | Mean score for completeness of reporting (scale 0-10, items not weighted) | <p>In Diaz-Ordaz (78): No global effect provided (see effects for individual items in Table 2 of the paper)</p> <p>In Pandis et al. (128): Difference of 0.93</p> <p>In Péron et al. (129): No difference in medians</p> <p>In Kloukos et al. (130): 0.27</p> |
|------------------------|---------------------------------------|-------------------------------------------------------|---------------------------------------------------------------------------------------------------------------------------------------|---------|-----------------------|---------------------------------------------------------------------------|---------------------------------------------------------------------------------------------------------------------------------------------------------------------------------------------------------------------------------------------------------------|

\*Difference between adherence to RGs in intervention and non-intervention group. We did not report the CI of the effect size when authors did not report it in the original papers.

\*\*As the 80 individual studies that belong to this category used different measures of adherence to reporting guidelines, we report here the measures used in the two systematic reviews that summarized the pooled results of most of these studies (3,6).

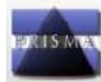

# PRISMA–ScR Checklist\*

| Section/topic             | # | Checklist item                                                                                                                                                                                                                                                            | Reported on page #                                 |
|---------------------------|---|---------------------------------------------------------------------------------------------------------------------------------------------------------------------------------------------------------------------------------------------------------------------------|----------------------------------------------------|
| <b>TITLE</b>              |   |                                                                                                                                                                                                                                                                           |                                                    |
| Title                     | 1 | Identify the report as a scoping review.                                                                                                                                                                                                                                  | 1                                                  |
| <b>ABSTRACT</b>           |   |                                                                                                                                                                                                                                                                           |                                                    |
| Structured summary        | 2 | Provide a structured summary that includes (as applicable) background, objectives, eligibility criteria, sources of evidence, charting methods, results, and conclusions that relate to the review questions and objectives.                                              | 1,2                                                |
| <b>INTRODUCTION</b>       |   |                                                                                                                                                                                                                                                                           |                                                    |
| Rationale                 | 3 | Describe the rationale for the review in the context of what is already known. Explain why the review questions/objectives lend themselves to a scoping review approach.                                                                                                  | 3,4<br>("Background")                              |
| Objectives                | 4 | Provide an explicit statement of the questions and objectives being addressed with reference to their key elements (e.g., population or participants, concepts, and context) or other relevant key elements used to conceptualize the review questions and/or objectives. | 5<br>("Objectives")                                |
| <b>METHODS</b>            |   |                                                                                                                                                                                                                                                                           |                                                    |
| Protocol and registration | 5 | Indicate whether a review protocol exists; state if and where it can be accessed (e.g., a Web address); and if available, provide registration information, including the registration number.                                                                            | 5 ("Methods")                                      |
| Eligibility criteria      | 6 | Specify characteristics of the sources of evidence used as eligibility criteria (e.g., years considered, language, and publication status), and provide a rationale.                                                                                                      | 5,6 ("Eligibility Criteria", "Exclusion Criteria") |
| Information sources       | 7 | Describe all information sources in the search (e.g., databases with dates of coverage and contact with authors to identify additional sources), as well as the date the most recent search was executed.                                                                 | 6 ("Search Strategy and Study Selection")          |
| Search                    | 8 | Present the full electronic search strategy for at least 1 database, including any limits used, such that it could be repeated.                                                                                                                                           | 6 ("Search Strategy and Study Selection")          |
| Study selection           | 9 | State the process for selecting sources of evidence (i.e., screening and eligibility) included in the scoping review.<br>For peer review only - <a href="http://bmjopen.bmj.com/site/about/guidelines.xhtml">http://bmjopen.bmj.com/site/about/guidelines.xhtml</a>       | 6,7 ("Search Strategy and Study Selection")        |

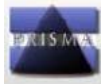

# PRISMA–ScR Checklist\*

1  
2  
3  
4  
5  
6  
7  
8  
9  
10  
11  
12  
13  
14  
15  
16  
17  
18  
19  
20  
21  
22  
23  
24  
25  
26  
27  
28  
29  
30  
31  
32  
33  
34  
35  
36  
37  
38  
39  
40  
41  
42  
43  
44  
45  
46  
47

|                                    |    |                                                                                                                                                                                                                                                                                                            |                       |
|------------------------------------|----|------------------------------------------------------------------------------------------------------------------------------------------------------------------------------------------------------------------------------------------------------------------------------------------------------------|-----------------------|
|                                    |    |                                                                                                                                                                                                                                                                                                            | Selection")           |
| Data collection process            | 10 | Describe the methods of charting data from the included sources of evidence (e.g., calibrated forms or forms that have been tested by the team before their use, and whether data charting was done independently or in duplicate) and any processes for obtaining and confirming data from investigators. | 8 ("Data Extraction") |
| Data items                         | 11 | List and define all variables for which data were sought and any assumptions and simplifications made.                                                                                                                                                                                                     | 8 ("Data Extraction") |
| Risk of bias in individual studies | 12 | If done, provide a rationale for conducting a critical appraisal of included sources of evidence; describe the methods used and how this information was used in any data synthesis (if appropriate).                                                                                                      | N/A                   |
| Summary measures                   | 13 | Not applicable for scoping reviews.                                                                                                                                                                                                                                                                        | N/A                   |
| Synthesis of results               | 14 | Describe the methods of handling and summarizing the data that were charted.                                                                                                                                                                                                                               | 9 ("Data Synthesis)   |

Page 1 of 2

| Section/topic                 | #  | Checklist item 10                                                                                                                                                            | Reported on page # |
|-------------------------------|----|------------------------------------------------------------------------------------------------------------------------------------------------------------------------------|--------------------|
| Risk of bias across studies   | 15 | Not applicable for scoping reviews.                                                                                                                                          | N/A                |
| Additional analyses           | 16 | Not applicable for scoping reviews.                                                                                                                                          | N/A                |
| <b>RESULTS</b>                |    |                                                                                                                                                                              |                    |
| Study selection               | 17 | Give numbers of sources of evidence screened, assessed for eligibility, and included in the review, with reasons for exclusions at each stage, ideally using a flow diagram. | Figure 1           |
| Study characteristics         | 18 | For each source of evidence, present characteristics for which data were charted and provide the citations.                                                                  | 10 ("Results)      |
| Risk of bias within studies   | 19 | If done, present data on critical appraisal of included sources of evidence (see item 12).                                                                                   | N/A                |
| Results of individual studies | 20 | For each included source of evidence, present the relevant data that were charted that relate to the review questions and objectives.                                        | 10 ("Results")     |
| Synthesis of results          | 21 | Summarize and/or present the charting results as they relate to the review questions and objectives.                                                                         | 10-15 ("Results")  |



## PRISMA–ScR Checklist\*

1  
2  
3  
4  
5  
6  
7  
8  
9  
10  
11  
12  
13  
14  
15  
16  
17  
18  
19  
20  
21  
22  
23  
24  
25  
26  
27  
28  
29  
30  
31  
32  
33  
34  
35  
36  
37  
38  
39  
40  
41  
42  
43  
44  
45  
46  
47

|                             |    |                                                                                                                                                                                                 |                                  |
|-----------------------------|----|-------------------------------------------------------------------------------------------------------------------------------------------------------------------------------------------------|----------------------------------|
| Risk of bias across studies | 22 | Not applicable for scoping reviews.                                                                                                                                                             |                                  |
| Additional analysis         | 23 | Not applicable for scoping reviews.                                                                                                                                                             |                                  |
| <b>DISCUSSION</b>           |    |                                                                                                                                                                                                 |                                  |
| Summary of evidence         | 24 | Summarize the main results (including an overview of concepts, themes, and types of evidence available), link to the review questions and objectives, and consider the relevance to key groups. | 15<br>("Discussion")             |
| Limitations                 | 25 | Discuss the limitations of the scoping review process.                                                                                                                                          | 17<br>("Discussion")             |
| Conclusions                 | 26 | Provide a general interpretation of the results with respect to the review questions and objectives, as well as potential implications and/or next steps.                                       | 15-17<br>("Discussion")          |
| <b>FUNDING</b>              |    |                                                                                                                                                                                                 |                                  |
| Funding                     | 27 | Describe sources of funding for the included sources of evidence, as well as sources of funding for the scoping review. Describe the role of the funders of the scoping review.                 | 18<br>("Declarations – Funding") |

\*Original source: <http://annals.org/aim/fullarticle/2700389/prisma-extension-scoping-reviews-prisma-scr-checklist-explanation>

# BMJ Open

## A scoping review on interventions to improve adherence to reporting guidelines in health research

|                                 |                                                                                                                                                                                                                                                                                                                                                                                                                                                             |
|---------------------------------|-------------------------------------------------------------------------------------------------------------------------------------------------------------------------------------------------------------------------------------------------------------------------------------------------------------------------------------------------------------------------------------------------------------------------------------------------------------|
| Journal:                        | <i>BMJ Open</i>                                                                                                                                                                                                                                                                                                                                                                                                                                             |
| Manuscript ID                   | bmjopen-2018-026589.R2                                                                                                                                                                                                                                                                                                                                                                                                                                      |
| Article Type:                   | Research                                                                                                                                                                                                                                                                                                                                                                                                                                                    |
| Date Submitted by the Author:   | 17-Jan-2019                                                                                                                                                                                                                                                                                                                                                                                                                                                 |
| Complete List of Authors:       | Blanco, David; Universitat Politècnica de Catalunya, Statistics and Operations Research<br>Altman, Doug; Centre for Statistics in Medicine<br>Moher, David; Ottawa Hospital Research Institute, Centre for Journalology<br>Boutron, Isabelle; Université Paris Descartes, Centre d'épidémiologie clinique<br>Kirkham, Jamie; University of Liverpool, Biostatistics<br>Cobo, Erik; Universitat Politècnica de Catalunya, Statistics and Operations Research |
| <b>Primary Subject Heading</b>: | Medical publishing and peer review                                                                                                                                                                                                                                                                                                                                                                                                                          |
| Secondary Subject Heading:      | Medical education and training, Research methods                                                                                                                                                                                                                                                                                                                                                                                                            |
| Keywords:                       | Scoping review, Quality of reporting, Completeness of reporting, Reporting guidelines, Knowledge synthesis, Adherence                                                                                                                                                                                                                                                                                                                                       |
|                                 |                                                                                                                                                                                                                                                                                                                                                                                                                                                             |

SCHOLARONE™  
Manuscripts



# 1 A scoping review on interventions to improve adherence to 2 reporting guidelines in health research

## 3 Authors

4 David Blanco<sup>1,2</sup>, Doug Altman<sup>3</sup>, David Moher<sup>4</sup>, Isabelle Boutron<sup>5</sup>, Jamie J Kirkham<sup>6\*</sup> and  
5 Erik Cobo<sup>1\*</sup>.

6 \*JJK and EC are joint senior authors.

7 <sup>1</sup>Statistics and Operations Research Department, Universitat Politècnica de Catalunya -  
8 Barcelona Tech, Barcelona, Spain.

9 <sup>2</sup>INSERM, U1153 Epidemiology and Biostatistics Sorbonne Paris Cité Research Center  
10 (CRESS), Methods of Therapeutic Evaluation of Chronic Diseases (METHODS) Team, Paris  
11 Descartes University, Sorbonne Paris Cité, Paris F-75014, France.

12 <sup>3</sup>Centre for Statistics in Medicine, University of Oxford, Oxford, UK.

13 <sup>4</sup>Centre for Journalology, Ottawa Hospital Research Institute, Ottawa, Canada.

14 <sup>5</sup>Centre d'Epidémiologie Clinique, Université Paris Descartes, Paris, France.

15 <sup>6</sup>Department of Biostatistics, University of Liverpool, Liverpool, UK.

16 Correspondence to David Blanco; [david.blanco.tena@upc.edu](mailto:david.blanco.tena@upc.edu)

## 17 Keywords

18 Scoping review, knowledge synthesis, reporting guidelines, completeness of reporting,  
19 quality of reporting, adherence

## 20 Abstract

21 **Objectives:** The goal of this study is to identify, analyse and classify interventions to  
22 improve adherence to reporting guidelines in order to obtain a wide picture of how the

1  
2  
3 23 problem of enhancing the completeness of reporting of biomedical literature has been  
4  
5 24 tackled so far.

6  
7  
8 25 **Design:** Scoping review.

9  
10  
11 26 **Search strategy:** We searched the MEDLINE, EMBASE, and Cochrane Library databases  
12  
13 27 and conducted a grey literature search for (i) studies evaluating interventions to improve  
14  
15 28 adherence to reporting guidelines in health research and (ii) other types of references  
16  
17 29 describing interventions that have been performed or suggested but never evaluated.  
18  
19 30 The characteristics and effect of the evaluated interventions were analysed. Moreover,  
20  
21 31 we explored the rationale of the interventions identified and determined the existing  
22  
23 32 gaps in research on the evaluation of interventions to improve adherence to reporting  
24  
25 33 guidelines.

26  
27 34 **Results:** 109 references containing 31 interventions (11 evaluated) were included. These  
28  
29 35 were grouped into five categories: (1) training on the use of reporting guidelines, (2)  
30  
31 36 improving understanding, (3) encouraging adherence, (4) checking adherence and  
32  
33 37 providing feedback, and (5) involvement of experts. Additionally, we identified lack of  
34  
35 38 evaluated interventions (i) on training on the use of reporting guidelines and improving  
36  
37 39 their understanding, (ii) at early stages of research, and (iii) after the final acceptance of  
38  
39 40 the manuscript.

40  
41 41 **Conclusions:** This scoping review identified a wide range of strategies to improve  
42  
43 42 adherence to reporting guidelines that can be taken by different stakeholders.  
44  
45 43 Additional research is needed to assess the effectiveness of many of these interventions.

#### 46 47 44 **Strengths and limitations**

- 48  
49  
50 45
  - We considered wide range of reporting guidelines as well as their extensions.
- 51  
52 46
  - Merging the evidence found in the published and grey literature allowed us to
- 53  
54 47 provide a broad picture of how the problem of enhancing adherence to reporting
- 55  
56 48 guidelines has been tackled so far and could be faced in the future.
- 57  
58 49
  - The screening and data extraction were performed in duplicate.
- 59  
60

- 1  
2  
3  
4 50       • We could have missed evidence of possible interventions that may not be  
5 51           present in the published or grey literature but are instead used in practice and  
6  
7 52           continue to be used.  
8  
9

## 10 53   **Background**

11  
12  
13 54   Approximately 85% of all biomedical research today is estimated to be wasted, due, in  
14  
15 55   part, to incomplete or inaccurate reporting (1). The past two decades have given rise to  
16  
17 56   a number of changes in an effort to help authors and the broader scientific community  
18  
19 57   properly report research methods and findings, which would allow them to contribute  
20  
21 58   to the broader goal of combating waste in biomedical research. The most prominent of  
22  
23 59   these changes has been the inception of reporting guidelines for different study types,  
24  
25 60   data, and clinical areas (2).

26  
27 61   The vast majority of reporting guidelines have not yet been assessed as to whether they  
28  
29 62   help improve the reporting of research (3), but some, such as the Consolidated  
30  
31 63   Standards of Reporting Trials (CONSORT) for the reporting of randomised controlled  
32  
33 64   trials (RCTs) (4), have been shown to enhance the completeness of reporting (5,6).

34  
35 65   Dozens of systematic reviews have explored the extent of adherence to some reporting  
36  
37 66   guidelines in certain areas of health research (7–10). Saaman et al. (11) went one step  
38  
39 67   further and performed a systematic review of systematic reviews assessing adherence  
40  
41 68   to reporting guidelines. As they considered a broad range of clinical areas and study  
42  
43 69   designs, their results provided a global picture of adherence to reporting guidelines in  
44  
45 70   health research. Although some studies reported acceptable overall levels of  
46  
47 71   completeness of reporting and found that it had improved since the introduction of  
48  
49 72   certain reporting guidelines such as CONSORT, the authors of most of the reviews (43 of  
50  
51 73   50, 86%) concluded that more improvement is needed or that adherence to reporting  
52  
53 74   guidelines was inadequate, poor, medium or suboptimal. Therefore, it is warranted to  
54  
55 75   explore and develop strategies to improve the current levels of adherence to reporting  
56  
57 76   guidelines.  
58  
59  
60

1  
2  
3 77 In recent years, several initiatives aiming to improve adherence to reporting guidelines  
4  
5 78 have been proposed, some of which have already been evaluated. For example, the  
6  
7 79 effect of journal endorsement of reporting guidelines (3,5,6) and the implementation of  
8  
9 80 writing aid tools for authors such as the CONSORT-based web tool (COBWEB) (12) have  
10  
11 81 been assessed. While some of these strategies have not been shown to have a benefit  
12  
13 82 (3), others report better but still suboptimal levels of reporting (5,6) or even clear  
14  
15 83 benefits (12,13).

16  
17 84 As mentioned, several reviews have analysed the quality of reporting in different clinical  
18  
19 85 areas and for different study types (7–10). However, no scoping review has been  
20  
21 86 performed that provides a global picture of different strategies aiming to improve  
22  
23 87 adherence to reporting guidelines. Given the low levels of completeness of reporting in  
24  
25 88 health research that have been observed (11), along with the imperative need to take  
26  
27 89 further actions for mitigating this problem, we considered that performing such a  
28  
29 90 scoping review was warranted.

30  
31 91 In addition to analysing the implementation and effect of interventions that have  
32  
33 92 already been evaluated, we aimed to gather other possible strategies that could be  
34  
35 93 implemented and evaluated in the future.

36  
37 94 For clarification, some relevant terms used throughout the scoping are defined in Box  
38  
39 95 1, which is based on Stevens et al. (3).

40  
41 96 **Box 1:** relevant definitions in the context of this scoping review  
42  
43  
44  
45  
46  
47  
48  
49  
50  
51  
52  
53  
54  
55  
56  
57  
58  
59  
60

**Adherence:** Action(s) taken by authors to ensure that a research report is compliant with the items recommended by the appropriate/relevant reporting guideline. These can take place before or after the first version of the manuscript is published.

**Endorsement:** Action(s) taken by journals to indicate their support for the use of one or more reporting guideline(s) by authors submitting research reports for consideration.

**Implementation:** Action(s) taken by journals to ensure that authors adhere to an endorsed reporting guideline and that therefore published papers are completely reported.

**Complete reporting:** Pertains to the state of reporting of a study report and whether it is compliant with all the items recommended by the appropriate/relevant reporting guideline.

97

## 98 **Methods**

99 As presented in the published protocol (14), this scoping review follows the  
100 methodology manual published by the Joanna Briggs Institute for scoping reviews (15).

## 101 **Objectives**

102 The scoping review questions are:

- 103 1. What interventions to improve adherence to reporting guidelines in health  
104 research have been evaluated?
- 105 2. What further interventions to improve adherence to reporting guidelines have  
106 been performed or suggested but never evaluated?

107 We aimed to analyse and classify the interventions found for both questions in order to  
108 obtain a wide picture of how the problem of adhering better to reporting guidelines has  
109 been tackled so far and can be tackled in the future.

## 110 **Eligibility criteria**

111 We included:

- 112 1. Studies evaluating interventions aiming to improve adherence to reporting  
113 guidelines in health research, irrespective of study design.

1  
2  
3 114 2. Commentaries, editorials, letters, studies, and online sources describing possible  
4  
5 115 interventions to improve adherence to reporting guidelines that have been  
6  
7 116 performed or suggested but never evaluated.  
8  
9

10 117 The reporting guidelines considered were those shown on 8 May 2017 on the EQUATOR  
11 118 (Enhancing the QUALity and Transparency Of Health Research) Network website (16) as  
12 119 “Reporting Guidelines for main study types”. In addition, we included QUOROM (Quality  
13 120 of Reporting of Meta-analyses), since it was the precursor of PRISMA. Supplementary  
14 121 file 1 shows all reporting guidelines considered.  
15  
16  
17  
18

19  
20 122 We considered the following languages: English, Spanish, French, German and Catalan.  
21  
22

### 23 123 **Exclusion criteria**

24  
25 124 We have excluded references that include interventions that do not specifically aim to  
26 125 improve the completeness of reporting, even though these interventions may actually  
27 126 influence completeness. For example, we have excluded clinical trial registration even  
28 127 though it may enhance completeness of reporting, because its main goals are to improve  
29 128 clinical trial transparency while also reducing publication and selective reporting biases.  
30  
31  
32  
33  
34

### 35 129 **Search strategy and study selection**

36  
37  
38 130 On 8 May 2017, we searched PubMed, EMBASE, and Cochrane Library databases for  
39 131 articles published between 1 January 1996 and 31 March 2017, in accordance with our  
40 132 scheduled search (14). The detailed search terms for PubMed can be found in the  
41 133 protocol.  
42  
43  
44  
45

46 134 The retrieved studies were exported into Mendeley and duplicates were automatically  
47 135 removed using it. One reviewer (DB) first screened the titles and abstracts for eligibility.  
48 136 Each of the other two reviewers (JJK and EC) was randomly assigned 50% of the  
49 137 references and screened the titles and abstracts independently of the first reviewer. The  
50 138 reviewers classified the references into one of the following groups:  
51  
52  
53  
54  
55

56  
57 139 A) Evaluated: Includes references describing interventions to improve adherence to  
58 140 reporting guidelines that have been empirically assessed.  
59  
60

1  
2  
3 141 B) Non-evaluated: Includes references describing interventions to improve  
4 adherence to reporting guidelines that have been performed or suggested but  
5 142 never evaluated.  
6  
7 143

8 144 C) Unclear: Includes references (i) containing vague statements such as “Authors,  
9 editors, and journals have to adhere better to reporting guidelines to improve  
10 145 the quality of reporting” or “greater efforts have to be made by authors to check  
11 146 that their research is compliant with [the relevant reporting guideline]”, or (ii)  
12 147 not having the abstract available.  
13  
14 148

15 149 D) Excluded: Includes references (i) not describing interventions to improve  
16 150 adherence to any of the reporting guidelines considered and (ii) describing but  
17 151 not evaluating certain interventions that have already been classified as  
18 152 evaluated.  
19  
20  
21  
22  
23  
24  
25

26 153 Disagreements were solved by discussion among the reviewers.  
27  
28

29 154 Second, one reviewer (DB) examined the full-text of all group A and B references to  
30 155 confirm the previous classification, then all group C references to reclassify them either  
31 156 as group A, B, or D. Re-classification was verified by the initial reviewer (JJK or EC).  
32  
33 157 Finally, one reviewer (DB) ensured literature saturation by searching the reference lists  
34 158 of included studies, the lists of articles citing them according to PubMed, and the  
35 159 individual studies included in two relevant systematic reviews (3,6).  
36  
37  
38  
39  
40

41 160 In addition, we performed a grey literature search, which included: the websites of  
42 161 networks and organizations promoting the use of reporting guidelines (i.e., EQUATOR  
43 162 Network and National Library of Medicine Research Reporting Guidelines and  
44 163 Initiatives); work groups of medical journal editors (i.e., International Committee of  
45 164 Medical Journal Editors (ICMJE) and World Association of Medical Editors (WAME));  
46 165 biomedical journal publishers (i.e., BMJ Publishing Group and BioMed Central); funding  
47 166 agencies (i.e., National Institute of Health (NIH) and European Research Council); online  
48 167 platforms of post-publication peer review (i.e., PubPeer and ScienceOpen); and the  
49 168 abstract books of the past editions of the International Congress on Peer Review and  
50 169 Biomedical Publication.  
51  
52  
53  
54  
55  
56  
57  
58  
59  
60

1  
2  
3 170 Some of the included references were described in studies co-authored by some of the  
4  
5 171 authors this scoping review. These references underwent the same process of screening,  
6  
7 172 data extraction, and data synthesis as the others.  
8  
9

### 10 173 **Data extraction**

11  
12 174 A data extraction form was developed to collect the information necessary for data  
13  
14 175 synthesis. Two reviewers (DB, JJK) independently performed a pilot data extraction on a  
15  
16 176 random sample of 5 articles and subsequently refined the form.  
17  
18

19 177 Extracted data included:

- 20  
21  
22 178 1. Publication characteristics: title, year of publication, author, author's affiliation  
23  
24 179 country, and field of study.  
25  
26 180 2. Characteristics of the intervention:
- 27 181 a. Classification as evaluated or non-evaluated.
  - 28  
29 182 b. Research stage: education, grant writing, protocol writing, manuscript  
30  
31 183 writing, submission, journal peer review, copy-editing, and post-  
32  
33 184 publication.
  - 34  
35 185 c. Rationale of the intervention, which refers to the deduced reasons why  
36  
37 186 the intervention is evaluated or proposed.
  - 38  
39 187 d. For evaluated interventions: details of the intervention, study design (e.g.  
40  
41 188 RCT, before-after, etc.), reporting guidelines considered and format  
42  
43 189 (checklist, bullet points and/or examples), period of intervention,  
44  
45 190 number of journals and articles involved, effect size of the intervention  
46  
47 191 on adherence to reporting guidelines and measure used to assess this  
48  
49 192 effect.
- 50  
51 193 3. Relevant conclusions.

52 194 Two reviewers (DB, JJK) independently performed data extraction for all studies except  
53  
54 195 for the individual studies of the two systematic reviews evaluating journal endorsement  
55  
56 196 of reporting guidelines (3,6), since none of these studies described further interventions  
57  
58 197 and their results had already been reported in these reviews. Discrepancies between  
59  
60 198 reviewers were discussed and solved by consensus.



## 199 **Data synthesis**

200 Following data extraction, interventions to improve adherence to reporting guidelines  
201 were categorised as follows:

- 202 1. Training on the practical use of reporting guidelines: mentoring of different  
203 stakeholders on the practical use of reporting guidelines.
- 204 2. Enhancing accessibility and understanding: dissemination of reporting guidelines  
205 and the improvement of authors' understanding of their content.
- 206 3. Encouraging adherence: suggestions and tools to facilitate compliance.
- 207 4. Checking adherence and providing feedback: checking the level of compliance  
208 and indicating incorrect or missing items.
- 209 5. Involvement of experts: interaction and cooperation on methodology and  
210 reporting.

211 One reviewer (DB) performed the initial categorization, which was verified and refined  
212 by the other two reviewers (JJK and EC).

213 Furthermore, we determined the existing gaps in research on the evaluation of  
214 interventions to improve adherence to reporting guidelines. More specifically, we  
215 identified which categories of interventions and which research stages have not been  
216 addressed so far in studies evaluating interventions.

217 We did not perform a meta-analysis of the observational studies assessing journal  
218 endorsement of reporting guidelines that were not included in the two systematic  
219 reviews previously mentioned (3,6). We considered that, for the purpose of this scoping  
220 review, these systematic reviews provided a reliable picture of the impact of this  
221 editorial intervention.

## 222 **Deviations from the protocol**

223 In order to better capture the most relevant aspects of the included studies, the original  
224 data extraction form proposed in the protocol was modified. We removed the health  
225 care area of the studies included, refined the research stages considered, and included  
226 more details on the implementation of the evaluated interventions.

## 227 **Patients and public involvement**

228 No patients or public were involved in the study.

## 229 **Results**

230 The database search yielded 1399 citations after deduplication (see Figure 1). Screening  
231 of titles and abstracts resulted in a first classification, after which 435 papers were  
232 included for full text review. We also reviewed the full text of 24 additional references  
233 found through forward citation searching. Furthermore, a grey literature search yielded  
234 7 additional references. Finally, 109 references were included. Some of these  
235 interventions appeared in more than one reference and some of the references  
236 contained more than one intervention. 90 of these references (86 observational and 4  
237 randomised studies) described 11 evaluated interventions and the other 19 (12 research  
238 studies, 2 editorials, 2 blogs, 1 commentary, 1 essay, and 1 perspective) described 20  
239 non-evaluated interventions. Figure 2 displays these 31 interventions according to their  
240 categorization and the research stage where they can be performed. Moreover, Table 1  
241 shows all interventions in a tabular format together with their rationale. All  
242 interventions reported in this section were found in the literature and do not necessarily  
243 correspond to the personal ideas of the scoping review authors.

244

245 Among the 11 evaluated interventions identified, we found a variety of measures used  
246 to assess their effect on adherence to reporting guidelines, including:

- 247 • Score for completeness of reporting for each paper, either assigning different or  
248 equal weights to RG items, on a 0-10 scale.
- 249 • Percentage of items reported for each paper.
- 250 • Percentage of compliance per RG item.
- 251 • Score for the Manuscript Quality Assessment Instrument (17) for each paper.

252 Due to the heterogeneity of these measures and for the sake of clarity, we prefer to  
253 omit the information on the exact effect sizes in the main body of the manuscript and  
254 show it in Supplementary file 2, together with the implementation details of the

1  
2  
3 255 evaluated interventions. In this way, these effects can be understood in an appropriate  
4  
5 256 context.  
6  
7

8 257 Research gaps identified (see Figure 3) included the evaluation of interventions (i) on  
9  
10 258 training on the use of reporting guidelines and improving understanding of these, and  
11  
12 259 (ii) at early stages of research (education, grant writing or protocol writing), and (iii) after  
13  
14 260 the final acceptance of the manuscript (copyediting or post-publication peer review).  
15

16 261 Hereafter, we describe the interventions found for each category (Table 1 and  
17  
18 262 Supplementary file 2 summarise these interventions).  
19

### 20 21 263 ***Training on the practical use of reporting guidelines***

22  
23 264 Four non-evaluated interventions related to educating different stakeholders on the  
24  
25 265 practical use of reporting guidelines were found (18-23).  
26  
27

28 266 In a first step, health profession schools could incorporate reporting guidelines into  
29  
30 267 curricula that address research methodology and publication standards (18–22). In line  
31  
32 268 with this, students could develop protocols for coursework and research using reporting  
33  
34 269 guidelines such as SPIRIT (randomised trials) and PRISMA-P (systematic reviews), and  
35  
36 270 educators may encourage adherence to those guidelines and grade the protocols using  
37  
38 271 them (21). For their part, funders may consider supporting author training on reporting  
39  
40 272 guidelines (23). Finally, journals or publishers may consider investing resources in  
41  
42 273 training editors and reviewers on the content and use of reporting guidelines (22,23).  
43

### 44 274 ***Enhancing accessibility and understanding***

45  
46 275 We identified three non-evaluated interventions focused on increasing the awareness  
47  
48 276 of the existence of reporting guidelines, as well as the authors' understanding of content  
49  
50 277 of these (24-26).  
51

52  
53 278 First, international scientific associations may play an important role in disseminating  
54  
55 279 and popularizing reporting guidelines to large audiences (24). Second, reporting  
56  
57 280 guideline developers might consider translating them to new languages that have not  
58  
59 281 been addressed yet (25). Finally, further databases of examples of good reporting for  
60

1  
2  
3 282 different reporting guidelines that are accessible to authors can be developed, as has  
4  
5 283 been done for CONSORT (26).  
6  
7

8 284 ***Encouraging adherence***

9  
10 285 Fourteen interventions found were associated with different strategies to facilitate  
11  
12 286 compliance with reporting guidelines (11,12,21,27–115). Six of these were evaluated  
13  
14 287 (47)(12,27–46,48–107,113).  
15

16 288 Funders might require authors to use reporting guidelines as a template for grant  
17  
18 289 application proposals (21). Later on, research ethics boards may require that protocols  
19  
20 290 submitted for ethical approval clearly state which reporting guidelines the study will be  
21  
22 291 using based on the study design, and that reporting guideline checklists are part of the  
23  
24 292 application for ethics approval (11). Funders could also encourage adherence to  
25  
26 293 reporting guidelines by asking for reporting guideline checklists as part of the authors'  
27  
28 294 report (21,108).  
29

30 295 One initiative to support authors adhering to reporting guidelines at the writing stage of  
31  
32 296 the manuscript has been COBWEB, a writing aid tool that aims to help authors  
33  
34 297 adequately combine the different extensions of the CONSORT statement (12). This tool  
35  
36 298 divided the CONSORT items into bullet points showing the key elements that need to be  
37  
38 299 reported together with examples of adequate reporting. The impact of COBWEB was  
39  
40 300 evaluated in a randomised trial that showed a large effect of this intervention (12) (see  
41  
42 301 Supplementary file 2 for more details about this and other evaluated interventions). A  
43  
44 302 second option to support authors at manuscript writing is that they follow a more  
45  
46 303 structured approach. For example, ClinicalTrials.gov requires authors to report key  
47  
48 304 information in a tabular format when registering a study or making available its results  
49  
50 305 (116). This has been shown to be effective: some results posted on this platform,  
51  
52 306 especially harms, are more complete than those in corresponding journal articles  
53  
54 307 reporting the same trials (47). Another possibility to improve the structure of  
55  
56 308 manuscripts is to include new subheadings corresponding to different reporting  
57  
58 309 guideline items within the traditional IMRaD format (Introduction, Methods, Results,  
59  
60 310 and Discussion), as the American Journal of Orthodontics and Dentofacial Orthopedics  
311 (AJO-DO) proposed (112). Finally, authors may also avoid omissions when writing the

1  
2  
3 312 manuscript if mark up the text and highlight where each item of the relevant checklist is  
4  
5 313 addressed (109).  
6  
7

8 314 At manuscript submission stage, different editorial actions have been taken to improve  
9  
10 315 adherence to reporting guidelines. The most popular is what has traditionally been  
11  
12 316 defined as journal endorsement of reporting guidelines, which is usually defined as one  
13  
14 317 or more of the three following interventions: (a) journal editorial statement endorsing  
15  
16 318 certain reporting guidelines; (b) requirement or recommendation in journal's  
17  
18 319 'Instructions to Authors' to follow certain reporting guidelines when preparing their  
19  
20 320 manuscript; or (c) requirement for authors to submit the appropriate reporting  
21  
22 321 guideline checklist together with their manuscript indicating page numbers  
23  
24 322 corresponding to each item (6). Dozens of observational studies have explored the  
25  
26 323 possible effect of journal endorsement of different reporting guidelines in different  
27  
28 324 clinical areas (27–46,48–106,113). A recent systematic review focused on CONSORT  
29  
30 325 evaluations showed relative but suboptimal improvements in the completeness of  
31  
32 326 reporting in journals by following the aforementioned policies (6), while another  
33  
34 327 systematic review considering 9 other guidelines showed no improvements (3).

35 328 Journals might also consider other strategies to enhance adherence to reporting  
36  
37 329 guidelines at submission. A first option could be to develop shorter, core versions of  
38  
39 330 reporting guidelines containing key items, which could be provided to authors as part of  
40  
41 331 the submission process (110). Second, they might introduce publication officers in order  
42  
43 332 to provide guidance to authors on preparing manuscripts for submission (111). Third,  
44  
45 333 editors may ask authors to populate the relevant checklist with text from their  
46  
47 334 manuscript and not accept a submission unless this is provided (114).

48 335 Finally, editors may suggest that peer reviewers use reporting guidelines (107). In  
49  
50 336 addition, by asking peer reviewers questions about whether the author has followed  
51  
52 337 reporting guidelines, this might be an indirect way to encourage them (115).  
53

#### 54 338 ***Checking adherence and providing feedback***

55  
56  
57 339 Eight interventions were related to monitoring level of compliance with reporting  
58  
59 340 guidelines of the manuscripts and providing instructions to authors on how to improve  
60

1  
2  
3 341 the reporting of missing or incorrect items (13,117–123). Four of them were evaluated  
4  
5 342 (13,117–119).  
6  
7

8 343 Some journals have opted for implementing reporting guidelines at peer review. First,  
9  
10 344 an associate editor may assess manuscripts for adherence to the relevant reporting  
11  
12 345 guideline and ask authors to make changes accordingly (117). This process may be  
13  
14 346 repeated until the associate editor thinks that the manuscript can move to the next step  
15  
16 347 of the review process, leading to an editorial decision. This intervention was evaluated  
17  
18 348 at the AJO-DO and showed satisfactory results: 33 of 37 items reached perfect  
19  
20 349 compliance (117). Second, peer reviewers could also assess the manuscripts against the  
21  
22 350 appropriate checklist (118). While the observed effect of this intervention was slightly  
23  
24 351 positive, it was smaller than hypothesized. In fact, investigators pointed out that authors  
25  
26 352 tended to comply better with suggestions coming from standard reviews rather than  
27  
28 353 from reviews against reporting guidelines, implying that it might be difficult to adhere  
29  
30 354 to high methodological standards at late stages of research if these standards are not  
31  
32 355 considered earlier in the research process. Third, journals could also ask trained editorial  
33  
34 356 assistants to check manuscripts against reporting guidelines (120) or to implement  
35  
36 357 automatic peer review tools such as Statreviewer (124), software that automatically  
37  
38 358 checks adherence to reporting guidelines and evaluates the appropriate use and  
39  
40 359 reporting of statistical tests (121). Currently, its performance is being assessed through  
41  
42 360 a pilot trial in collaboration with four BioMed Central Journals (121). In any of those  
43  
44 361 cases, emails could be sent to authors asking them to revise the manuscript according  
45  
46 362 to guidelines (13). To do this, the EQUATOR Network has provided standard letters that  
47  
48 363 can be used a) after checks by an editor or a single peer reviewer, b) after full peer  
49  
50 364 review, or c) alongside acceptance (125). Furthermore, at the time of author revision of  
51  
52 365 the manuscript, Hopewell et al. found no significant effect when incorporating  
53  
54 366 WebCONSORT, a web-based tool that generates a unique list of items customised to the  
55  
56 367 trial design, to the revision process of journals that endorsed CONSORT but had no active  
57  
58 368 policy for implementing it (119). Finally, in a late stage of the publication process,  
59  
60 369 copyediting of the manuscript could also ensure that all items are covered (122).

370 Once the paper is published, the scientific community could use online platforms of  
371 post-publication peer review such as PubPeer (126) or ScienceOpen (127) to evaluate

1  
2  
3 372 the adherence to reporting guidelines of published articles and to provide feedback to  
4  
5 373 authors (123).  
6  
7

### 8 374 ***Involvement of experts***

9  
10 375 Two interventions identified implied interaction and cooperation between authors and  
11  
12 376 experts on methodology and reporting at different stages of research (78,108,128–130).  
13  
14 377 One of them was evaluated (78,128–130).  
15  
16

17 378 On the one hand, statisticians (or epidemiologists or other quantitative methodologists)  
18  
19 379 may get involved in the design, conduct or reporting of the study might contribute to  
20  
21 380 properly reporting key areas such as sample size calculation, randomization, blinding,  
22  
23 381 and appropriate statistical analysis (129). While three studies found a statistically  
24  
25 382 significant positive relationship between CONSORT scores and statistician involvement  
26  
27 383 (78,129,130), another one did not (128). On the other hand, it has been hypothesized  
28  
29 384 that the involvement of medical writers during the manuscript writing stage of research  
30  
31 385 could improve the completeness of reporting (108).  
32

### 33 386 **Interventions described in papers co-authored by authors of this scoping review**

34  
35 387 25 (of 109) included references describing 21 (of 31) included interventions were co-  
36  
37 388 authored by at least one of the authors of this scoping review  
38  
39 389 (12,13,63,67,74,76,80,104,107,111,114,115,20,117–120,123,21–23,26,47,54,55).  
40  
41

### 42 390 **Discussion**

43  
44  
45 391 In this scoping review, we identified 31 interventions to improve adherence to reporting  
46  
47 392 guidelines. We have also determined the gaps in research on the evaluation of this type  
48  
49 393 of interventions. By considering a wide range of reporting guidelines as well as their  
50  
51 394 extensions and merging the evidence found in the published and grey literature, this  
52  
53 395 review provides a broad picture of how the problem of enhancing adherence to  
54  
55 396 reporting guidelines has been tackled so far and could be faced in the future.

56  
57 397 This study reveals that most published research aimed at improving adherence to  
58  
59 398 reporting guidelines has been conducted in journals. Typically, journal strategies range  
60

1  
2  
3 399 from making available editorial statements that endorse certain reporting guidelines,  
4  
5 400 recommending or requiring authors to follow reporting guidelines in the “Instructions  
6  
7 401 to authors”, and requiring authors to submit a reporting guideline checklist together  
8  
9 402 with the manuscript, with page numbers indicated for each item. However, these  
10  
11 403 strategies have been shown not to have the desired effect (3,6,131). Recent research  
12  
13 404 has called for more active and enforced journal policies throughout the editorial  
14  
15 405 process, such as requiring the use of structured approaches with new subheadings  
16  
17 406 adapted to different kinds of study designs (112), which was also found to be beneficial  
18  
19 407 in a new study outside of our search period (132); providing guidance on manuscript  
20  
21 408 preparation (111); making sure the peer review process involves editorial assistants who  
22  
23 409 have specific training on reporting issues (120); and implementing automatic peer  
24  
25 410 review tools (121). Journals will vary in their ability to make some of these strategies  
26  
27 411 effective, depending on factors such as their resources, their guidelines to peer  
28  
29 412 reviewers and the dedication of their editors – many editors and editorial staff work  
30  
31 413 part-time and have limited amount of time.

32  
33 414 Moreover, editors’ education and performance should be improved. A recent study  
34  
35 415 pointed out that more than a third (39%) of the manuscripts classified as randomised  
36  
37 416 trials by the editorial staff were not actually randomised trials (119,133). Consequently,  
38  
39 417 it seems difficult to improve author and peer reviewer adherence to reporting guidelines  
40  
41 418 if journal gatekeepers are not properly trained in methodological and reporting issues.

42  
43 419 Apart from journals, editors and peer reviewers, other key stakeholders such as medical  
44  
45 420 schools, research funders, universities and other research institutions should also take  
46  
47 421 responsibility regarding this issue. This scoping review provides some strategies to  
48  
49 422 follow. However, as the problem is complex and the possible interventions are varied,  
50  
51 423 enhancing the completeness of reporting most likely depends not so much on any  
52  
53 424 isolated action but on a set of strategies by several different stakeholders. These could  
54  
55 425 be enacted at different stages of research, from education to article post-publication.

56  
57 426 For interventions aiming to improve adherence to reporting guidelines, we should  
58  
59 427 require the same level of evidence that we require for interventions to improve health.  
60  
428 For this reason, it is striking that we found only 4 published randomised trials that



1  
2  
3 429 evaluated interventions to improve adherence to reporting guidelines (12,107,118,119).  
4  
5 430 Among these trials, statistically significant effect of the intervention was only observed  
6  
7 431 for the use of the writing aid tool for authors COBWEB (12). While performing an  
8  
9 432 additional review against reporting guidelines showed slightly positive but not  
10  
11 433 significant effect (118), suggesting the use of reporting guidelines to peer reviewers  
12  
13 434 (107) or implementing at the process of author revision of the manuscript the web-  
14  
15 435 based tool WebCONSORT showed no benefit (119). The rest of the evaluations of  
16  
17 436 interventions found (86 of 90) were observational studies, whose results are subject to  
18  
19 437 the influence of confounding factors. As already mentioned, the impact of journal  
20  
21 438 endorsement on completeness of reporting was suboptimal (3,6). However,  
22  
23 439 completeness of reporting improved remarkably when reporting guidelines were  
24  
25 440 actively implemented by editors (e.g. if editors perform a completeness of reporting  
26  
27 441 check of the manuscript (117)) and when research results were posted in a tabular  
28  
29 442 format without discussion or conclusions (47). Future randomised trials should consider  
30  
31 443 evaluating these interventions or addressing some of the research gaps identified in this  
32  
33 444 review, such as improving adherence to reporting guidelines at the grant application or  
34  
35 445 protocol writing stages.

36  
37  
38 446

39  
40 447 A few of the interventions found in this review were shown to enhance adherence to  
41  
42 448 reporting guidelines. However, it is noteworthy there is no evidence that some  
43  
44 449 successful interventions (12,117) have been implemented more widely later. For this  
45  
46 450 reason, more resources and efforts are needed to further implement these  
47  
48 451 interventions in other settings, evaluate the effect, and share the results with the  
49  
50 452 scientific community. In any case, it is important to keep in mind that contemporary  
51  
52 453 publication culture may harm the potential improvements in reporting quality. This  
53  
54 454 could result from the fact that most scientists feel that the primary evaluation tool of  
55  
56 455 their research is the quantity of their scientific output rather than its quality (134); and  
57  
58 456 such attitudes may undermine the potential effect of any intervention to improve  
59  
60 457 adherence to reporting guidelines.

1  
2  
3 458 Our scoping review has some limitations. First, we did not formally assess the  
4  
5 459 methodological quality of the studies that evaluated interventions. Second, restricting  
6  
7 460 to certain databases or not having standard search terms for the databases searched  
8  
9 461 may have excluded relevant publications. Third, it is possible that we could have missed  
10  
11 462 evidence of possible interventions that may have never been reflected in the published  
12  
13 463 or grey literature but are instead used in practice and continue to be used. For example,  
14  
15 464 journals might be applying specific editorial strategies that are not publicly available on  
16  
17 465 their websites or in the published literature.

## 18 19 466 **Conclusion**

20  
21  
22 467 Improving adherence to reporting guidelines is one of the key issues in order to enhance  
23  
24 468 complete and accurate reporting and therefore reduce waste in research.

25  
26 469 Different stakeholders – such as research funders, ethics boards, and journals – should  
27  
28 470 consider implementing and evaluating some of the interventions identified in this study.

## 29 30 31 471 **List of abbreviations**

32  
33  
34 472 AJO-DO: American Journal of Orthodontics and Dentofacial Orthopedics; CONSORT:  
35  
36 473 CONSolidated Standards Of Reporting Trials; COBWEB: CONSORT-based web tool;  
37  
38 474 EQUATOR: Enhancing the QUALity and Transparency Of Health Research; RCT:  
39  
40 475 Randomised Controlled Trial; RG: Reporting Guideline; SPIRIT: Standard Protocol Items:  
41  
42 476 Recommendations for Interventional Trials; PRISMA: Preferred Reporting Items for  
43  
44 477 Systematic Reviews and Meta-Analyses

## 45 46 478 **Declarations**

47  
48  
49 479 **Funding:** This scoping review belongs to the ESR 14 research project from the Methods in  
50  
51 480 Research on Research (MiRoR) project (<http://miror-ejd.eu/>), which has received funding from  
52  
53 481 the European Union's Horizon 2020 research and innovation programme under the Marie  
54  
55 482 Sklodowska-Curie grant agreement No 676207. DM is supported through a University Research  
56  
57 483 Chair (University of Ottawa).

58  
59 484 **Competing interests:** DA and DM are Directors of the UK and Canadian EQUATOR Centres,  
60

1  
2  
3 485 respectively. IB is deputy director of French EQUATOR Centre.  
4  
5

6 486 **Author contributions:** All authors contributed to conceptualizing and designing the study. DB,  
7 487 EC, and JJK independently performed screening. DB and JJK independently performed data  
8 488 extraction. DB performed initial data synthesis and EC, IB, DM, DGA, and JJK refined it. DB  
9 489 drafted the manuscript. EC, IB, DM, DGA, and JJK made major revisions. Due to the strong  
10 490 involvement of JJK and EC at several different stages of the study, all authors agreed to consider  
11 491 them joint senior authors of the scoping review, although EC was the only senior author of the  
12 492 protocol. All authors read and approved the final manuscript, which was completed in April  
13 493 2018. DGA passed away in June 2018 and therefore could not approve the revised manuscript  
14 494 (November 2018).

15  
16  
17  
18  
19  
20  
21 495 **Availability of data and materials:** The datasets used and/or analysed during the current study  
22 496 are available from the corresponding author on reasonable request.

23  
24  
25  
26 497 **Acknowledgements:** The authors thank the MiRoR Project (<http://mirror-ejd.eu/>) and Marie  
27 498 Sklodowska-Curie Actions for their support. The authors also thank Matt Elmore for editorial  
28 499 help. This review is part of a larger project whose next goals are (i) to capture editors'  
30 500 perceptions on the barriers and facilitators of some promising interventions identified in this  
31 501 review, (ii) to explore new possible interventions, and (iii) to evaluate one of these interventions  
32 502 in collaboration with BMJ Open.  
33  
34  
35  
36

37 503  
38  
39

## 40 504 **References**

- 41  
42  
43 505 1. Chalmers I, Glasziou P. Avoidable waste in the production and reporting of  
44 506 research evidence. *Lancet* [Internet]. 2009 Jul [cited 2018 Nov  
45 507 12];374(9683):86–9. Available from:  
46 508 <http://linkinghub.elsevier.com/retrieve/pii/S0140673609603299>  
47  
48  
49  
50  
51 509 2. EQUATOR Network. Library for health research reporting. Available from:  
52 510 [http://www.equator-network.org/resource-centre/library-of-health-research-](http://www.equator-network.org/resource-centre/library-of-health-research-reporting)  
53 511 [reporting](http://www.equator-network.org/resource-centre/library-of-health-research-reporting)  
54  
55  
56  
57  
58 512 3. Stevens A, Shamseer L, Weinstein E, Yazdi F, Turner L, Thielman J, et al. Relation  
59 513 of completeness of reporting of health research to journals' endorsement of

- 1  
2  
3 514 reporting guidelines: systematic review. *BMJ* [Internet]. 2014 Jun 25 [cited 2017  
4 Jun 7];348(jun25 2):g3804–g3804. Available from:  
5  
6 516 <http://www.bmj.com/cgi/doi/10.1136/bmj.g3804>  
7  
8  
9 517 4. Schulz KF, Altman DG, Moher D, CONSORT Group. CONSORT 2010 statement:  
10 updated guidelines for reporting parallel group randomised trials. *BMJ*  
11 [Internet]. 2010 Mar 23 [cited 2018 Mar 3];340:c332. Available from:  
12 518  
13 519 <http://www.ncbi.nlm.nih.gov/pubmed/20332509>  
14 520  
15  
16  
17 521 5. Plint AC, Moher D, Morrison A, Schulz K, Altman DG, Hill C, et al. Does the  
18 CONSORT checklist improve the quality of reports of randomised controlled  
19 trials? A systematic review. *Med J Aust* [Internet]. 2006 Sep 4 [cited 2017 Feb  
20 522  
21 523 24];185(5):263–7. Available from:  
22 524  
23 525 <http://www.ncbi.nlm.nih.gov/pubmed/16948622>  
24 526  
25  
26  
27 526 6. Turner L, Shamseer L, Altman DG, Schulz KF, Moher D, L. T, et al. Does use of the  
28 CONSORT Statement impact the completeness of reporting of randomised  
29 controlled trials published in medical journals? A Cochrane review. *Syst Rev*  
30 [Internet]. 2012 Nov 29 [cited 2017 Feb 24];1(1):60. Available from:  
31 527  
32 528 [http://systematicreviewsjournal.biomedcentral.com/articles/10.1186/2046-](http://systematicreviewsjournal.biomedcentral.com/articles/10.1186/2046-4053-1-60)  
33 529  
34 530  
35 531 4053-1-60  
36  
37  
38  
39 532 7. Bereza BG, Machado M, Einarson TR, B.G. B, M. M, T.R. E, et al. Assessing the  
40 reporting and scientific quality of meta-analyses of randomized controlled trials  
41 of treatments for anxiety disorders. *Ann Pharmacother* [Internet]. 2008 Oct 26  
42 533  
43 534 [cited 2017 Feb 23];42(10):1402–9. Available from:  
44 535  
45 536 [http://www.embase.com/search/results?subaction=viewrecord&from=export&](http://www.embase.com/search/results?subaction=viewrecord&from=export&id=L352440213)  
46 537  
47  
48  
49 537  
50  
51 538 8. Fung AE, Palanki R, Bakri SJ, Depperschmidt E, Gibson A. Applying the CONSORT  
52 and STROBE statements to evaluate the reporting quality of neovascular age-  
53 related macular degeneration studies. *Ophthalmology* [Internet]. 2009 Feb  
54 539  
55 540 [cited 2017 Jun 26];116(2):286–96. Available from:  
56 541  
57 542 <http://linkinghub.elsevier.com/retrieve/pii/S0161642008009020>  
58  
59  
60

- 1  
2  
3 543 9. Rios LP, Odueyungbo A, Moitri MO, Rahman MO, Thabane L, L.P. R, et al. Quality  
4 544 of reporting of randomized controlled trials in general endocrinology literature.  
5 545 J Clin Endocrinol Metab [Internet]. 2008 Oct [cited 2017 Feb 24];93(10):3810–6.  
6 546 Available from: <http://press.endocrine.org/doi/10.1210/jc.2008-0817>
- 10  
11 547 10. Shea B, Bouter LM, Grimshaw JM, Francis D, Ortiz Z, Wells GA, et al. Scope for  
12 548 improvement in the quality of reporting of systematic reviews. From the  
13 549 Cochrane Musculoskeletal Group. J Rheumatol [Internet]. 2006 Jan [cited 2017  
14 550 Feb 24];33(1):9–15. Available from:  
15 551 <http://www.ncbi.nlm.nih.gov/pubmed/16267878>
- 20  
21 552 11. Samaan Z, Mbuagbaw L, Kosa D, Borg Debono V, Dillenburg R, Zhang S, et al. A  
22 553 systematic scoping review of adherence to reporting guidelines in health care  
23 554 literature. J Multidiscip Healthc [Internet]. 2013 May [cited 2017 Jun 26];6:169–  
24 555 88. Available from: [http://www.dovepress.com/a-systematic-scoping-review-of-](http://www.dovepress.com/a-systematic-scoping-review-of-adherence-to-reporting-guidelines-in-he-peer-reviewed-article-JMDH)  
25 556 [adherence-to-reporting-guidelines-in-he-peer-reviewed-article-JMDH](http://www.dovepress.com/a-systematic-scoping-review-of-adherence-to-reporting-guidelines-in-he-peer-reviewed-article-JMDH)
- 30  
31 557 12. Barnes C, Boutron I, Giraudeau B, Porcher R, Altman DG, Ravaud P. Impact of an  
32 558 online writing aid tool for writing a randomized trial report: the COBWEB  
33 559 (Consort-based WEB tool) randomized controlled trial. BMC Med [Internet].  
34 560 2015 Sep 15 [cited 2017 Feb 24];13(1):221. Available from:  
35 561 <http://bmcmmedicine.biomedcentral.com/articles/10.1186/s12916-015-0460-y>
- 40  
41 562 13. Hopewell S, Ravaud P, Baron G, Boutron I. Effect of editors' implementation of  
42 563 CONSORT guidelines on the reporting of abstracts in high impact medical  
43 564 journals: interrupted time series analysis. 2012 Jun 22 [cited 2017 Jan  
44 565 16];344(jun22 1). Available from:  
45 566 <http://www.ncbi.nlm.nih.gov/pubmed/22730543>
- 50  
51 567 14. Blanco D, Kirkham JJ, Altman DG, Moher D, Boutron I, Cobo E. Interventions to  
52 568 improve adherence to reporting guidelines in health research: a scoping review  
53 569 protocol. BMJ Open [Internet]. 2017;7(11):e017551. Available from:  
54 570 <http://bmjopen.bmj.com/lookup/doi/10.1136/bmjopen-2017-017551>

- 1  
2  
3 571 15. Reviewers' Manual. 2015; Available from: [www.joannabriggs.org](http://www.joannabriggs.org)  
4  
5  
6 572 16. EQUATOR Network. Available from: <http://www.equator-network.org/>  
7  
8  
9 573 17. Goodman SN, Berlin J, Fletcher SW, Fletcher RH. Manuscript quality before and  
10 after peer review and editing at Annals of Internal Medicine. *Ann Intern Med*  
11 574 [Internet]. 1994 Jul 1 [cited 2018 Nov 16];121(1):11–21. Available from:  
12 575 <http://www.ncbi.nlm.nih.gov/pubmed/8198342>  
13  
14 576  
15  
16  
17 577 18. Ma B, Qi G, Lin X, Wang T, Chen Z, Yang K. Epidemiology, quality, and reporting  
18 characteristics of systematic reviews of acupuncture interventions published in  
19 578 Chinese journals. *J Altern Complement Med* [Internet]. 2012 Sep [cited 2017 Jul  
20 579 17];18(9):813–7. Available from:  
21 580 <http://online.liebertpub.com/doi/abs/10.1089/acm.2011.0274>  
22  
23 581  
24  
25  
26  
27 582 19. Larson EL, Cortazal M. Publication guidelines need widespread adoption. *J Clin*  
28 583 *Epidemiol* [Internet]. 2012 Mar [cited 2017 Jul 21];65(3):239–46. Available from:  
29 584 <http://linkinghub.elsevier.com/retrieve/pii/S0895435611002290>  
30  
31  
32  
33  
34 585 20. Sarkis-Onofre R, Cenci MS, Moher D, Pereira-Cenci T. Research Reporting  
35 586 Guidelines in Dentistry: A Survey of Editors. *Braz Dent J* [Internet]. 2017 [cited  
36 587 2017 Nov 9];28(1):3–8. Available from: [http://dx.doi.org/10.1590/0103-](http://dx.doi.org/10.1590/0103-6440201601426)  
37  
38 588 [6440201601426](http://dx.doi.org/10.1590/0103-6440201601426)  
39  
40  
41  
42 589 21. Shamseer L, Moher D, Clarke M, Ghersi D, Liberati A, Petticrew M, et al.  
43 Preferred reporting items for systematic review and meta-analysis protocols  
44 590 (PRISMA-P) 2015: elaboration and explanation. *BMJ* [Internet]. 2015 Jan 2 [cited  
45 591 2017 Feb 24];349(jan02 1):g7647–g7647. Available from:  
46 592 <http://www.bmj.com/cgi/doi/10.1136/bmj.g7647>  
47  
48 593  
49  
50  
51  
52 594 22. Simera I, Moher D, Hirst A, Hoey J, Schulz KF, Altman DG. Transparent and  
53 595 accurate reporting increases reliability, utility, and impact of your research:  
54 596 reporting guidelines and the EQUATOR Network. *BMC Med* [Internet].  
55 597 2010;8(1):24. Available from:  
56 598 <http://bmcmmedicine.biomedcentral.com/articles/10.1186/1741-7015-8-24>  
57  
58  
59  
60

- 1  
2  
3 599 23. Glasziou P, Altman DG, Bossuyt P, Boutron I, Clarke M, Julious S, et al. Reducing  
4 600 waste from incomplete or unusable reports of biomedical research. *Lancet*  
5 601 [Internet]. 2014 Jan 18 [cited 2017 Sep 29];383(9913):267–76. Available from:  
6  
7 602 <http://www.ncbi.nlm.nih.gov/pubmed/24411647>  
8  
9  
10  
11 603 24. Verbeek J. Moose Consort Strobe and Miame Stard Remark or how can we  
12 604 improve the quality of reporting studies. *Scand J Work Environ Health* [Internet].  
13 605 2008 Jun [cited 2017 Feb 24];34(3):165–7. Available from:  
14  
15 606 <http://www.ncbi.nlm.nih.gov/pubmed/18728905>  
16  
17  
18  
19 607 25. Kim KH, Kang JW, Lee MS, Lee J-D. Assessment of the quality of reporting in  
20 608 randomised controlled trials of acupuncture in the Korean literature using the  
21 609 CONSORT statement and STRICTA guidelines. *BMJ Open* [Internet]. 2014 Jul 29  
22 610 [cited 2017 Jul 17];4(7):e005068. Available from:  
23  
24 611 <http://bmjopen.bmj.com/cgi/doi/10.1136/bmjopen-2014-005068>  
25  
26  
27  
28  
29 612 26. Moher D, Hopewell S, Schulz KF, Altman DG. Resources for authors of reports of  
30 613 randomized trials: harnessing the wisdom of authors, editors, and readers. *Trials*  
31 614 [Internet]. 2011;12(1):98. Available from:  
32  
33 615 <http://trialsjournal.biomedcentral.com/articles/10.1186/1745-6215-12-98>  
34  
35  
36  
37  
38 616 27. Faunce TA, Buckley NA. Of consents and CONSORTs: reporting ethics, law, and  
39 617 human rights in RCTs involving monitored overdose of healthy volunteers pre  
40 618 and post the ‘CONSORT’ guidelines. *J Toxicol Clin Toxicol* [Internet].  
41 619 2003 [cited 2017 Nov 9];41(2):93–9. Available from:  
42  
43 620 <http://www.ncbi.nlm.nih.gov/pubmed/12733843>  
44  
45  
46  
47  
48 621 28. Halpern SH, Darani R, Douglas MJ, Wight W, Yee J, S.H. H, et al. Compliance with  
49 622 the CONSORT checklist in obstetric anaesthesia randomised controlled trials. *Int*  
50 623 *J Obstet Anesth* [Internet]. 2004 Oct [cited 2017 Feb 24];13(4):207–14. Available  
51 624 from: <http://www.ncbi.nlm.nih.gov/pubmed/15477048>  
52  
53  
54  
55  
56 625 29. Hewitt C, Hahn S, Torgerson DJ, Watson J, Bland JM. Adequacy and reporting of  
57 626 allocation concealment: review of recent trials published in four general medical  
58  
59  
60

- 1  
2  
3 627 journals. *BMJ* [Internet]. 2005 May 7 [cited 2017 Nov 9];330(7499):1057–8.  
4  
5 628 Available from: <http://www.bmj.com/cgi/doi/10.1136/bmj.38413.576713.AE>  
6  
7  
8 629 30. Greenfield MLVH, Rosenberg AL, O'Reilly M, Shanks AM, Sliwinski MJ, Naus  
9  
10 630 MD. The Quality of Randomized Controlled Trials in Major Anesthesiology  
11  
12 631 Journals. *Anesth Analg* [Internet]. 2005 Jun [cited 2017 Nov 9];100(6):1759–64.  
13  
14 632 Available from: <http://www.ncbi.nlm.nih.gov/pubmed/15920210>  
15  
16 633 31. Llorca J, Martínez-Sanz F, Prieto-Salceda D, Fariñas-Alvarez C, Chinchón MV,  
17  
18 634 Quinones D, et al. Quality of controlled clinical trials on glaucoma and  
19  
20 635 intraocular high pressure. *J Glaucoma* [Internet]. 2005 Jun [cited 2017 Nov  
21  
22 636 9];14(3):190–5. Available from:  
23  
24 637 <http://www.ncbi.nlm.nih.gov/pubmed/15870599>  
25  
26 638 32. Haahr MT, Hróbjartsson A. Who is blinded in randomized clinical trials? A study  
27  
28 639 of 200 trials and a survey of authors. *Clin Trials* [Internet]. 2006;3(4):360–5.  
29  
30 640 Available from: <http://www.ncbi.nlm.nih.gov/pubmed/17060210>  
31  
32  
33 641 33. Kober T, Trelle S, Engert A. Reporting of randomized controlled trials in Hodgkin  
34  
35 642 lymphoma in biomedical journals. *J Natl Cancer Inst* [Internet]. 2006 May 3  
36  
37 643 [cited 2017 Feb 24];98(9):620–5. Available from:  
38  
39 644 <http://www.ncbi.nlm.nih.gov/pubmed/16670387>  
40  
41 645 34. Biondi-Zoccai GGL, Lotrionte M, Abbate A, Testa L, Remigi E, Burzotta F, et al.  
42  
43 646 Compliance with QUOROM and quality of reporting of overlapping meta-  
44  
45 647 analyses on the role of acetylcysteine in the prevention of contrast associated  
46  
47 648 nephropathy: case study. *BMJ* [Internet]. 2006 Jan 28 [cited 2017 Nov  
48  
49 649 9];332(7535):202–9. Available from:  
50  
51 650 <http://www.bmj.com/cgi/doi/10.1136/bmj.38693.516782.7C>  
52  
53 651 35. Balasubramanian SP, Wiener M, Alshameeri Z, Tiruvoipati R, Elbourne D, Reed  
54  
55 652 MW, et al. Standards of reporting of randomized controlled trials in general  
56  
57 653 surgery: Can we do better? *Ann Surg* [Internet]. 2006 Nov [cited 2017 Feb  
58  
59 654 24];244(5):663–7. Available from:



- 1  
2  
3 655 <http://www.ncbi.nlm.nih.gov/pubmed/17060756>  
4  
5  
6 656 36. Dias S, McNamee R, Vail A, S. D, R. M, A. V, et al. Evidence of improving quality  
7  
8 657 of reporting of randomized controlled trials in subfertility. *Hum Reprod*  
9  
10 658 [Internet]. 2006 Oct [cited 2017 Feb 24];21(10):2617–27. Available from:  
11  
12 659 <http://www.ncbi.nlm.nih.gov/pubmed/16793995>  
13  
14 660 37. Smidt N, Rutjes AWS, van der Windt DAWM, Ostelo RWJG, Bossuyt PM, Reitsma  
15  
16 661 JB, et al. The quality of diagnostic accuracy studies since the STARD statement:  
17  
18 662 Has it improved? *Neurology* [Internet]. 2006 Sep 12 [cited 2018 Mar  
19  
20 663 12];67(5):792–7. Available from:  
21  
22 664 <http://www.ncbi.nlm.nih.gov/pubmed/16966539>  
23  
24 665 38. Coppus SFPJ, van der Veen F, Bossuyt PMM, Mol BWJ, S.F.P.J. C, F. van der V, et  
25  
26 666 al. Quality of reporting of test accuracy studies in reproductive medicine: impact  
27  
28 667 of the Standards for Reporting of Diagnostic Accuracy (STARD) initiative. *Fertil*  
29  
30 668 *Steril* [Internet]. 2006 Nov [cited 2017 Jun 26];86(5):1321–9. Available from:  
31  
32 669 <http://www.embase.com/search/results?subaction=viewrecord&from=export&i>  
33  
34 670 [d=L44602037](http://www.embase.com/search/results?subaction=viewrecord&from=export&id=L44602037)  
35  
36 671 39. Tiruvoipati R, Balasubramanian SP, Atturu G, Peek GJ, Elbourne D. Improving the  
37  
38 672 quality of reporting randomized controlled trials in cardiothoracic surgery: the  
39  
40 673 way forward. *J Thorac Cardiovasc Surg* [Internet]. 2006 Aug [cited 2017 Jul  
41  
42 674 21];132(2):233–40. Available from:  
43  
44 675 <http://www.ncbi.nlm.nih.gov/pubmed/16872940>  
45  
46 676 40. Mahoney J, Ellison J. Assessing the quality of glucose monitor studies: a critical  
47  
48 677 evaluation of published reports. *Clin Chem* [Internet]. 2007 Jun 19 [cited 2017  
49  
50 678 Nov 9];53(6):1122–8. Available from:  
51  
52 679 <http://www.clinchem.org/cgi/doi/10.1373/clinchem.2006.083493>  
53  
54  
55 680 41. Poolman RW, Abouali JAK, Conter HJ, Bhandari M. Overlapping systematic  
56  
57 681 reviews of anterior cruciate ligament reconstruction comparing hamstring  
58  
59 682 autograft with bone-patellar tendon-bone autograft: why are they different? *J*  
60

- 1  
2  
3 683 Bone Joint Surg Am [Internet]. 2007 Jul 1 [cited 2017 Nov 9];89(7):1542–52.  
4  
5 684 Available from: <http://jbs.org/cgi/doi/10.2106/JBJS.F.01292>  
6  
7  
8 685 42. Spring B, Pagoto S, Knatterud G, Kozak A, Hedeker D. Examination of the analytic  
9  
10 686 quality of behavioral health randomized clinical trials. J Clin Psychol [Internet].  
11  
12 687 2007 Jan [cited 2017 Nov 9];63(1):53–71. Available from:  
13  
14 688 <http://www.ncbi.nlm.nih.gov/pubmed/17115429>  
15  
16 689 43. Agha R, Cooper D, Muir G. The reporting quality of randomised controlled trials  
17  
18 690 in surgery: A systematic review. Int J Surg [Internet]. 2007 Dec [cited 2017 Nov  
19  
20 691 9];5(6):413–22. Available from:  
21  
22 692 <http://www.ncbi.nlm.nih.gov/pubmed/18029237>  
23  
24 693 44. Kane RL, Wang J, Garrard J. Reporting in randomized clinical trials improved  
25  
26 694 after adoption of the CONSORT statement. J Clin Epidemiol [Internet]. 2007 Mar  
27  
28 695 [cited 2017 Nov 9];60(3):241–9. Available from:  
29  
30 696 <http://linkinghub.elsevier.com/retrieve/pii/S0895435606002575>  
31  
32  
33 697 45. Paranjothy B, Shunmugam M, Azuara-Blanco A, B. P, M. S, A. A-B, et al. The  
34  
35 698 quality of reporting of diagnostic accuracy studies in glaucoma using scanning  
36  
37 699 laser polarimetry. J Glaucoma [Internet]. 2007 Dec [cited 2017 Feb  
38  
39 700 24];16(8):670–5. Available from:  
40  
41 701 <http://www.ncbi.nlm.nih.gov/pubmed/18091453>  
42  
43 702 46. Johnson ZK, Siddiqui MAR, Azuara-Blanco A, Z.K. J, M.A.R. S, A. A-B, et al. The  
44  
45 703 Quality of Reporting of Diagnostic Accuracy Studies of Optical Coherence  
46  
47 704 Tomography in Glaucoma. Ophthalmology [Internet]. 2007 Sep [cited 2017 Feb  
48  
49 705 24];114(9):1607–12. Available from:  
50  
51 706 <http://www.ncbi.nlm.nih.gov/pubmed/17434589>  
52  
53 707 47. Riveros C, Dechartres A, Perrodeau E, Haneef R, Boutron I, Ravaud P. Timing and  
54  
55 708 Completeness of Trial Results Posted at ClinicalTrials.gov and Published in  
56  
57 709 Journals. Dickersin K, editor. PLoS Med [Internet]. 2013 Dec 3 [cited 2018 Nov  
58  
59 710 19];10(12):e1001566. Available from:  
60

- 1  
2  
3 711 <https://dx.plos.org/10.1371/journal.pmed.1001566>  
4  
5  
6 712 48. Hind D, Booth A. Do health technology assessments comply with QUOROM  
7  
8 713 diagram guidance? An empirical study. *BMC Med Res Methodol* [Internet]. 2007  
9  
10 714 Nov 20 [cited 2017 Jul 17];7:49. Available from:  
11  
12 715 <http://www.ncbi.nlm.nih.gov/pubmed/18021461>  
13  
14 716 49. Lee PE, Fischer HD, Rochon PA, Gill SS, Herrmann N, Bell CM, et al. Published  
15  
16 717 randomized controlled trials of drug therapy for dementia often lack complete  
17  
18 718 data on harm. *J Clin Epidemiol* [Internet]. 2008 Nov [cited 2017 Nov  
19  
20 719 22];61(11):1152–60. Available from:  
21  
22 720 <http://linkinghub.elsevier.com/retrieve/pii/S0895435607004829>  
23  
24 721 50. Pat K, Doms C, Vansteenkiste J, K. P, C. D, J. V, et al. Systematic review of  
25  
26 722 symptom control and quality of life in studies on chemotherapy for advanced  
27  
28 723 non-small cell lung cancer: How CONSORTed are the data? *Lung Cancer*  
29  
30 724 [Internet]. 2008 Oct [cited 2017 Mar 10];62(1):126–38. Available from:  
31  
32 725 <http://linkinghub.elsevier.com/retrieve/pii/S0169500208001062>  
33  
34 726 51. Folkes A, Urquhart R, Grunfeld E, A. F, R. U, E. G. Are leading medical journals  
35  
36 727 following their own policies on CONSORT reporting? *Contemp Clin Trials*  
37  
38 728 [Internet]. 2008 Nov [cited 2017 Jun 26];29(6):843–6. Available from:  
39  
40 729 <http://linkinghub.elsevier.com/retrieve/pii/S1551714408000906>  
41  
42 730 52. Sinha S, Sinha S, Ashby E, Jayaram R, Grocott MPW. Quality of reporting in  
43  
44 731 randomized trials published in high-quality surgical journals. *J Am Coll Surg*  
45  
46 732 [Internet]. 2009 Nov [cited 2017 Jul 17];209(5):565–571.e1. Available from:  
47  
48 733 <http://linkinghub.elsevier.com/retrieve/pii/S107275150901151X>  
49  
50 734 53. Freeman K, Szczepura A, Osipenko L, K. F, A. S, L. O, et al. Non-invasive fetal RHD  
51  
52 735 genotyping tests: a systematic review of the quality of reporting of diagnostic  
53  
54 736 accuracy in published studies. *Eur J Obstet Gynecol Reprod Biol* [Internet]. 2009  
55  
56 737 Feb [cited 2017 Jun 26];142(2):91–8. Available from:  
57  
58 738 <http://linkinghub.elsevier.com/retrieve/pii/S0301211508003916>  
59  
60

- 1  
2  
3 739 54. Uetani K, Nakayama T, Ikai H, Yonemoto N, Moher D, K. U, et al. Quality of  
4 740 reports on randomized controlled trials conducted in Japan: Evaluation of  
5 741 adherence to the CONSORT statement. Intern Med [Internet]. 2009 [cited 2017  
6 742 Feb 24];48(5):307–13. Available from:  
7 743 <http://www.ncbi.nlm.nih.gov/pubmed/19252352>  
8  
9  
10  
11  
12  
13 744 55. Ethgen M, Boutron L, Steg PG, Roy C, Ravaud P, M. E, et al. Quality of reporting  
14 745 internal and external validity data from randomized controlled trials evaluating  
15 746 stents for percutaneous coronary intervention. BMC Med Res Methodol  
16 747 [Internet]. 2009 Apr 9 [cited 2017 Feb 24];9(1):24. Available from:  
17 748 <http://www.embase.com/search/results?subaction=viewrecord&from=export&i>  
18 749 [d=L354667428](http://www.embase.com/search/results?subaction=viewrecord&from=export&id=L354667428)  
19  
20  
21  
22  
23  
24  
25 750 56. Krzych LJ, Liszka L. No improvement in studies reporting the diagnostic accuracy  
26 751 of B-type natriuretic peptide. Med Sci Monit [Internet]. 2009 May [cited 2017  
27 752 Nov 9];15(5):SR5-14. Available from:  
28 753 <http://www.ncbi.nlm.nih.gov/pubmed/19396053>  
29  
30  
31  
32  
33 754 57. Pagoto SL, Kozak AT, John P, Bodenlos JS, Hedeker D, Spring B, et al. Intention-  
34 755 to-treat analyses in behavioral medicine randomized clinical trials. Int J Behav  
35 756 Med [Internet]. 2009 Dec 25 [cited 2017 Feb 24];16(4):316–22. Available from:  
36 757 <http://link.springer.com/10.1007/s12529-009-9039-3>  
37  
38  
39  
40  
41  
42 758 58. Kidwell CS, Liebeskind DS, Starkman S, Saver JL. Trends in acute ischemic stroke  
43 759 trials through the 20th century. Stroke [Internet]. 2001 Jun [cited 2017 Nov  
44 760 9];32(6):1349–59. Available from:  
45 761 <http://www.ncbi.nlm.nih.gov/pubmed/11387498>  
46  
47  
48  
49  
50 762 59. Han C, Kwak K, Marks DM, Pae C-U, Wu L-T, Bhatia KS, et al. The impact of the  
51 763 CONSORT statement on reporting of randomized clinical trials in psychiatry.  
52 764 Contemp Clin Trials [Internet]. 2009 Mar [cited 2017 Jun 26];30(2):116–22.  
53 765 Available from: <http://linkinghub.elsevier.com/retrieve/pii/S1551714408001511>  
54  
55  
56  
57  
58 766 60. Alvarez F, Meyer N, Gourraud PA, Paul C, F. A, N. M, et al. CONSORT adoption  
59  
60

- 1  
2  
3 767 and quality of reporting of randomized controlled trials: a systematic analysis in  
4  
5 768 two dermatology journals. *Br J Dermatol* [Internet]. 2009 Nov [cited 2017 Feb  
6  
7 769 23];161(5):1159–65. Available from:  
8  
9 770 <http://www.embase.com/search/results?subaction=viewrecord&from=export&i>  
10 771 [d=L355782314](http://www.embase.com/search/results?subaction=viewrecord&from=export&i)  
11  
12  
13 772 61. Wei X, Tiejun L, Cheng W. Current situation on the reporting quality of  
14  
15 773 randomized controlled trials in 5 leading Chinese medical journals. *J Med Coll*  
16  
17 774 PLA [Internet]. 2009 Apr [cited 2018 Mar 12];24(2):105–11. Available from:  
18  
19 775 <http://linkinghub.elsevier.com/retrieve/pii/S1000194809600253>  
20  
21  
22 776 62. Ladd BO, McCrady BS, Manuel JK, Campbell W, B.O. L, B.S. M, et al. Improving  
23  
24 777 the quality of reporting alcohol outcome studies: Effects of the CONSORT  
25  
26 778 statement. *Addict Behav* [Internet]. 2010 Jul [cited 2017 Feb 24];35(7):660–6.  
27  
28 779 Available from: <http://linkinghub.elsevier.com/retrieve/pii/S0306460310000560>  
29  
30 780 63. Yu L-M, Chan A-W, Hopewell S, Deeks JJ, Altman DG. Reporting on covariate  
31  
32 781 adjustment in randomised controlled trials before and after revision of the 2001  
33  
34 782 CONSORT statement: a literature review. *Trials* [Internet]. 2010 May 18 [cited  
35  
36 783 2017 Nov 9];11(1):59. Available from:  
37  
38 784 <http://trialsjournal.biomedcentral.com/articles/10.1186/1745-6215-11-59>  
39  
40 785 64. Areia M, Soares M, Dinis-Ribeiro M. Quality reporting of endoscopic diagnostic  
41  
42 786 studies in gastrointestinal journals: where do we stand on the use of the STARD  
43  
44 787 and CONSORT statements? *Endoscopy* [Internet]. 2010 Feb 5 [cited 2017 Nov  
45  
46 788 9];42(2):138–47. Available from: <http://www.thieme->  
47  
48 789 [connect.de/DOI/DOI?10.1055/s-0029-1243846](http://www.thieme-connect.de/DOI/DOI?10.1055/s-0029-1243846)  
49  
50 790 65. Delaney M, Meyer E, Cserti-Gazdewich C, Haspel RL, Lin Y, Morris A, et al. A  
51  
52 791 systematic assessment of the quality of reporting for platelet transfusion  
53  
54 792 studies. *Transfusion* [Internet]. 2010 Oct [cited 2017 Jun 26];50(10):2135–44.  
55  
56 793 Available from: <http://doi.wiley.com/10.1111/j.1537-2995.2010.02691.x>  
57  
58 794 66. Flint HE, Harrison JE. How well do reports of clinical trials in the orthodontic  
59  
60

- 1  
2  
3 795 literature comply with the CONSORT statement? J Orthod [Internet]. 2010 Dec  
4 796 16 [cited 2017 Feb 24];37(4):250–61. Available from:  
5 797 <http://www.tandfonline.com/doi/full/10.1179/14653121043191>  
6  
7  
8  
9  
10 798 67. Hopewell S, Dutton S, Yu L-M, Chan A-W, Altman DG, S. H, et al. The quality of  
11 799 reports of randomised trials in 2000 and 2006: comparative study of articles  
12 800 indexed in PubMed. BMJ [Internet]. 2010 Mar 23 [cited 2017 Jun 26];340(mar23  
13 801 1):c723. Available from:  
14 802 <http://www.embase.com/search/results?subaction=viewrecord&from=export&i>  
15 803 [d=L358557565](http://www.embase.com/search/results?subaction=viewrecord&from=export&i)  
16  
17  
18  
19  
20  
21 804 68. Ernst E, Hung SK CY. NCCAM-funded RCTs of herbal medicines: An independent,  
22 805 critical assessment. Perfusion [Internet]. 2011;24:89–102. Available from:  
23 806 [https://www.researchgate.net/publication/288438592\\_NCCAM-](https://www.researchgate.net/publication/288438592_NCCAM-)  
24 807 [funded\\_RCTs\\_of\\_herbal\\_medicines\\_An\\_independent\\_critical\\_assessment](https://www.researchgate.net/publication/288438592_NCCAM-)  
25  
26  
27  
28  
29  
30 808 69. Sánchez-Thorin JC, Cortés MC, Montenegro M, Villate N, J.C. S-T, M.C. C, et al.  
31 809 The quality of reporting of randomized clinical trials published in  
32 810 Ophthalmology. Ophthalmology [Internet]. 2001 Feb [cited 2017 Feb  
33 811 24];108(2):410–5. Available from:  
34 812 <http://www.embase.com/search/results?subaction=viewrecord&from=export&i>  
35 813 [d=L32115976](http://www.embase.com/search/results?subaction=viewrecord&from=export&i)  
36  
37  
38  
39  
40  
41  
42 814 70. Selman TJ, Morris RK, Zamora J, Khan KS. The quality of reporting of primary test  
43 815 accuracy studies in obstetrics and gynaecology: application of the STARD  
44 816 criteria. BMC Womens Health [Internet]. 2011 Mar 23 [cited 2017 Jul  
45 817 17];11(1):8. Available from:  
46 818 <http://bmcwomenshealth.biomedcentral.com/articles/10.1186/1472-6874-11-8>  
47  
48  
49  
50  
51  
52 819 71. Parsons NR, Hiskens R, Price CL, Achten J, Costa ML, N.R. P, et al. A systematic  
53 820 survey of the quality of research reporting in general orthopaedic journals. J  
54 821 Bone Jt Surg - Ser B [Internet]. 2011 Sep 1 [cited 2017 Feb 24];93 B(9):1154–9.  
55 822 Available from: <http://www.bjj.boneandjoint.org.uk/cgi/doi/10.1302/0301->  
56 823 [620X.93B9.27193](http://www.bjj.boneandjoint.org.uk/cgi/doi/10.1302/0301-)  
57  
58  
59  
60

- 1  
2  
3 824 72. Kiehna EN, Starke RM, Pouratian N, Dumont AS. Standards for reporting  
4  
5 825 randomized controlled trials in neurosurgery. *J Neurosurg* [Internet]. 2011 Feb  
6  
7 826 [cited 2017 Feb 24];114(2):280–5. Available from:  
8  
9 827 <http://thejns.org/doi/10.3171/2010.8.JNS091770>  
10  
11 828 73. Strech D, Soltmann B, Weikert B, Bauer M, Pfennig A, D. S, et al. Quality of  
12  
13 829 reporting of randomized controlled trials of pharmacologic treatment of bipolar  
14  
15 830 disorders: A systematic review. *J Clin Psychiatry* [Internet]. 2011 Sep 15 [cited  
16  
17 831 2017 Feb 24];72(9):1214–21. Available from:  
18  
19 832 <http://article.psychiatrist.com/?ContentType=START&ID=10007267>  
20  
21 833 74. Turner L-A, Singh K, Garritty C, Tsertsvadze A, Manheimer E, Wieland LS, et al.  
22  
23 834 An evaluation of the completeness of safety reporting in reports of  
24  
25 835 complementary and alternative medicine trials. *BMC Complement Altern Med*  
26  
27 836 [Internet]. 2011 Aug 22 [cited 2017 Jun 26];11(1):67. Available from:  
28  
29 837 [http://bmccomplementalalternmed.biomedcentral.com/articles/10.1186/1472-](http://bmccomplementalalternmed.biomedcentral.com/articles/10.1186/1472-6882-11-67)  
30  
31 838 [6882-11-67](http://bmccomplementalalternmed.biomedcentral.com/articles/10.1186/1472-6882-11-67)  
32  
33 839 75. Haidich A-B, Birtsou C, Dardavessis T, Tirodimos I, Arvanitidou M, A.-B. H, et al.  
34  
35 840 The quality of safety reporting in trials is still suboptimal: survey of major  
36  
37 841 general medical journals. *J Clin Epidemiol* [Internet]. 2011 Feb [cited 2017 Feb  
38  
39 842 24];64(2):124–35. Available from:  
40  
41 843 <http://linkinghub.elsevier.com/retrieve/pii/S0895435610001083>  
42  
43 844 76. Gray R, Sullivan M, Altman DG, Gordon-Weeks AN, R. G, M. S, et al. Adherence  
44  
45 845 of trials of operative intervention to the CONSORT statement extension for  
46  
47 846 nonpharmacological treatments: A comparative before and after study. *Ann R*  
48  
49 847 *Coll Surg Engl* [Internet]. 2012 Sep 1 [cited 2017 Feb 24];94(6):388–94. Available  
50  
51 848 from: [http://openurl.ingenta.com/content/xref?genre=article&issn=0035-](http://openurl.ingenta.com/content/xref?genre=article&issn=0035-8843&volume=94&issue=6&spage=388)  
52  
53 849 [8843&volume=94&issue=6&spage=388](http://openurl.ingenta.com/content/xref?genre=article&issn=0035-8843&volume=94&issue=6&spage=388)  
54  
55 850 77. Cornelius VR, Sauzet O, Williams JE, Ayis S, Farquhar-Smith P, Ross JR, et al.  
56  
57 851 Adverse event reporting in randomised controlled trials of neuropathic pain:  
58  
59 852 considerations for future practice. *Pain* [Internet]. 2013 Feb [cited 2017 Nov  
60

- 1  
2  
3 853 22];154(2):213–20. Available from:  
4  
5 854 <http://content.wkhealth.com/linkback/openurl?sid=WKPTLP:landingpage&an=0>  
6  
7 855 0006396-201302000-00009  
8  
9  
10 856 78. Diaz-Ordaz K, Froud R, Sheehan B, Eldridge S. A systematic review of cluster  
11  
12 857 randomised trials in residential facilities for older people suggests how to  
13  
14 858 improve quality. *BMC Med Res Methodol* [Internet]. 2013 Oct 22 [cited 2017 Jul  
15  
16 859 17];13(1):127. Available from:  
17  
18 860 <http://bmcmedresmethodol.biomedcentral.com/articles/10.1186/1471-2288->  
19  
20 861 13-127  
21  
22 862 79. Geha NN, Moseley AM, Elkins MR, Chiavegato LD, Shiwa SR, Costa LOP. The  
23  
24 863 quality and reporting of randomized trials in cardiothoracic physical therapy  
25  
26 864 could be substantially improved. *Respir Care* [Internet]. 2013 Nov;58(11):1899–  
27  
28 865 906. Available from: <http://rc.rcjournal.com/cgi/doi/10.4187/respcare.02379>  
29  
30 866 80. Moher D, Jones A, Lepage L, CONSORT Group (Consolidated Standards for  
31  
32 867 Reporting of Trials). Use of the CONSORT statement and quality of reports of  
33  
34 868 randomized trials: a comparative before-and-after evaluation. *JAMA* [Internet].  
35  
36 869 2001 Apr 18 [cited 2017 Jun 7];285(15):1992–5. Available from:  
37  
38 870 <http://www.ncbi.nlm.nih.gov/pubmed/11308436>  
39  
40 871 81. Liu LQ, Morris PJ, Pengel LHM, L.Q. L, P.J. M, L.H.M. P, et al. Compliance to the  
41  
42 872 CONSORT statement of randomized controlled trials in solid organ  
43  
44 873 transplantation: A 3-year overview. *Transpl Int* [Internet]. 2013 Mar [cited 2017  
45  
46 874 Feb 24];26(3):300–6. Available from:  
47  
48 875 <http://www.embase.com/search/results?subaction=viewrecord&from=export&i>  
49  
50 876 [d=L52379666](http://www.embase.com/search/results?subaction=viewrecord&from=export&i)  
51  
52 877 82. Panic N, Leoncini E, de Belvis G, Ricciardi W, Boccia S, N. P, et al. Evaluation of  
53  
54 878 the endorsement of the preferred reporting items for systematic reviews and  
55  
56 879 meta-analysis (PRISMA) statement on the quality of published systematic review  
57  
58 880 and meta-analyses. Derrick GE, editor. *PLoS One* [Internet]. 2013 Dec 26 [cited  
59  
60 881 2017 Jan 15];8(12):e83138. Available from:



- 1  
2  
3 882 <http://www.embase.com/search/results?subaction=viewrecord&from=export&i>  
4  
5 883 [d=L372005920](http://www.embase.com/search/results?subaction=viewrecord&from=export&i)  
6  
7  
8 884 83. Fleming PS, Seehra J, Polychronopoulou A, Fedorowicz Z, Pandis N. A PRISMA  
9  
10 885 assessment of the reporting quality of systematic reviews in orthodontics. *Angle*  
11 886 *Orthod* [Internet]. 2013 Jan [cited 2017 Nov 9];83(1):158–63. Available from:  
12  
13 887 <http://www.ncbi.nlm.nih.gov/pubmed/22720835>  
14  
15  
16 888 84. Péron J, Maillet D, Gan HK, Chen EX, You B, J. P, et al. Adherence to CONSORT  
17  
18 889 adverse event reporting guidelines in randomized clinical trials evaluating  
19  
20 890 systemic cancer therapy: A systematic review. *J Clin Oncol* [Internet]. 2013 Nov  
21  
22 891 1 [cited 2017 Feb 24];31(31):3957–63. Available from:  
23  
24 892 <http://ascopubs.org/doi/10.1200/JCO.2013.49.3981>  
25  
26 893 85. Tunis AS, McInnes MDF, Hanna R, Esmail K. Association of Study Quality with  
27  
28 894 Completeness of Reporting: Have Completeness of Reporting and Quality of  
29  
30 895 Systematic Reviews and Meta-Analyses in Major Radiology Journals Changed  
31  
32 896 Since Publication of the PRISMA Statement? *Radiology* [Internet]. 2013 Nov  
33  
34 897 [cited 2018 Mar 12];269(2):413–26. Available from:  
35  
36 898 <http://pubs.rsna.org/doi/10.1148/radiol.13130273>  
37  
38 899 86. Maclean EN, Stone IS, Ceelen F, Garcia-Albeniz X, Sommer WH, Petersen SE.  
39  
40 900 Quality of reporting in cardiac MRI, CT and SPECT diagnostic accuracy studies:  
41  
42 901 Analysis of the impact of STARD criteria. *J Cardiovasc Magn Reson* [Internet].  
43  
44 902 2013 Jun 1 [cited 2017 Feb 24];15(6):61. Available from:  
45  
46 903 <http://www.embase.com/search/results?subaction=viewrecord&from=export&i>  
47  
48 904 [d=L70993941](http://www.embase.com/search/results?subaction=viewrecord&from=export&i)  
49  
50 905 87. Baker D, Lidster K, Sottomayor A, Amor S. Two Years Later: Journals Are Not Yet  
51  
52 906 Enforcing the ARRIVE Guidelines on Reporting Standards for Pre-Clinical Animal  
53  
54 907 Studies. Eisen JA, editor. *PLoS Biol* [Internet]. 2014 Jan 7 [cited 2017 Sep  
55  
56 908 29];12(1):e1001756. Available from:  
57  
58 909 <http://www.ncbi.nlm.nih.gov/pubmed/24409096>  
59  
60

- 1  
2  
3 910 88. Choi J, Jun JH, Kang BK, Kim KH, Lee MS, J. C, et al. Endorsement for improving  
4 911 the quality of reports on randomized controlled trials of traditional medicine  
5 912 journals in Korea: a systematic review. *Trials* [Internet]. 2014 Nov 5 [cited 2017  
6 913 Jan 15];15(1):429. Available from:  
7 914 <http://trialsjournal.biomedcentral.com/articles/10.1186/1745-6215-15-429>  
8  
9  
10  
11  
12  
13 915 89. Walther S, Schueler S, Tackmann R, Schuetz GM, Schlattmann P, Dewey M, et al.  
14 916 Compliance with STARD checklist among studies of coronary CT angiography:  
15 917 systematic review. *Radiology* [Internet]. 2014 Apr [cited 2017 Feb  
16 918 23];271(1):74–86. Available from:  
17 919 <http://pubs.rsna.org/doi/10.1148/radiol.13121720>  
18  
19  
20  
21  
22  
23 920 90. Ghimire S, Kyung E, Lee H, Kim E. Oncology trial abstracts showed suboptimal  
24 921 improvement in reporting: a comparative before-and-after evaluation using  
25 922 CONSORT for Abstract guidelines. *J Clin Epidemiol* [Internet]. 2014 Jun [cited  
26 923 2017 Feb 24];67(6):658–66. Available from:  
27 924 <http://linkinghub.elsevier.com/retrieve/pii/S0895435613004435>  
28  
29  
30  
31  
32  
33 925 91. Devereaux PJ, Manns BJ, Ghali WA, Quan H, Guyatt GH, P.J. D, et al. The  
34 926 reporting of methodological factors in randomized controlled trials and the  
35 927 association with a journal policy to promote adherence to the Consolidated  
36 928 Standards of Reporting Trials (CONSORT) checklist. *Control Clin Trials* [Internet].  
37 929 2002 Aug [cited 2017 Feb 24];23(4):380–8. Available from:  
38 930 <http://www.embase.com/search/results?subaction=viewrecord&from=export&i>  
39 931 [d=L34874890](http://www.embase.com/search/results?subaction=viewrecord&from=export&id=L34874890)  
40  
41  
42  
43  
44  
45  
46  
47 932 92. Song T-J, Leng H-F, Zhong LL, Wu T-X, Bian Z-X. CONSORT in China: past  
48 933 development and future direction. *Trials* [Internet]. 2015 Jun 1 [cited 2017 Jun  
49 934 26];16(1):243. Available from:  
50 935 <http://trialsjournal.biomedcentral.com/articles/10.1186/s13063-015-0769-z>  
51  
52  
53  
54  
55  
56 936 93. Stevely A, Dimairo M, Todd S, Julious SA, Nicholl J, Hind D, et al. An Investigation  
57 937 of the Shortcomings of the CONSORT 2010 Statement for the Reporting of  
58 938 Group Sequential Randomised Controlled Trials: A Methodological Systematic  
59  
60

- 1  
2  
3 939 Review. Shamji M, editor. PLoS One [Internet]. 2015 Nov 3 [cited 2017 Feb  
4 24];10(11):e0141104. Available from:  
5 940  
6  
7 941 <http://dx.plos.org/10.1371/journal.pone.0141104>  
8  
9  
10 942 94. Adie S, Ma D, Harris IA, Naylor JM, Craig JC, S. A, et al. Quality of conduct and  
11 943 reporting of meta-analyses of surgical interventions. *Ann Surg* [Internet]. 2015  
12 944 Apr [cited 2017 Jun 26];261(4):685–94. Available from:  
13 945 [http://content.wkhealth.com/linkback/openurl?sid=WKPTLP:landingpage%7B&  
14 946 %7Dan=00000658-201504000-00012](http://content.wkhealth.com/linkback/openurl?sid=WKPTLP:landingpage%7B&%7Dan=00000658-201504000-00012)  
15  
16  
17  
18  
19  
20 947 95. Jull A, Aye PS. Endorsement of the CONSORT guidelines, trial registration, and  
21 948 the quality of reporting randomised controlled trials in leading nursing journals:  
22 949 A cross-sectional analysis. *Int J Nurs Stud* [Internet]. 2015 Jun [cited 2017 Feb  
23 950 10];52(6):1071–9. Available from:  
24 951 <http://linkinghub.elsevier.com/retrieve/pii/S0020748914003022>  
25  
26  
27  
28  
29  
30 952 96. Bearn DR, Alharbi F. Reporting of clinical trials in the orthodontic literature from  
31 953 2008 to 2012: observational study of published reports in four major journals. *J*  
32 954 *Orthod* [Internet]. 2015 Sep 15 [cited 2017 Feb 24];42(3):186–91. Available  
33 955 from: <http://www.tandfonline.com/doi/full/10.1179/1465313315Y.0000000011>  
34  
35  
36  
37  
38 956 97. Agha RA, Fowler AJ, Limb C, Whitehurst K, Coe R, Sagoo H, et al. Impact of the  
39 957 mandatory implementation of reporting guidelines on reporting quality in a  
40 958 surgical journal: A before and after study. *Int J Surg* [Internet]. 2016 Jun [cited  
41 959 2017 Feb 20];30:169–72. Available from:  
42 960 <http://linkinghub.elsevier.com/retrieve/pii/S1743919116300620>  
43  
44  
45  
46  
47  
48 961 98. Pouwels KB, Widyakusuma NN, Groenwold RHH, Hak E. Quality of reporting of  
49 962 confounding remained suboptimal after the STROBE guideline. *J Clin Epidemiol*  
50 963 [Internet]. 2016 Jan [cited 2017 Feb 24];69:217–24. Available from:  
51 964 <http://linkinghub.elsevier.com/retrieve/pii/S0895435615003856>  
52  
53  
54  
55  
56 965 99. Rao A, Brück K, Methven S, Evans R, Stel VS, Jager KJ, et al. Quality of reporting  
57 966 and study design of CKD cohort studies assessing mortality in the elderly before  
58  
59  
60

- 1  
2  
3 967 and after STROBE: A systematic review. Zhou X, editor. PLoS One [Internet].  
4 968 2016 May 11 [cited 2017 Jun 26];11(5):e0155078. Available from:  
5  
6 969 <http://dx.plos.org/10.1371/journal.pone.0155078>  
7  
8  
9  
10 970 100. Grob ATM, van der Vaart LR, Withagen MIJ, van der Vaart CH. The quality of  
11 971 reporting of diagnostic accuracy studies in pelvic floor transperineal three-  
12 972 dimensional ultrasound: a systematic review. *Ultrasound Obstet Gynecol*  
13 973 [Internet]. 2016 Dec 21 [cited 2017 Mar 10]; Available from:  
14  
15 974 <http://doi.wiley.com/10.1002/uog.17390>  
16  
17  
18  
19  
20 975 101. Rikos D, Dardiotis E, Tsivgoulis G, Zintzaras E, Hadjigeorgiou GM, D. R, et al.  
21 976 Reporting quality of randomized-controlled trials in multiple sclerosis from 2000  
22 977 to 2015, based on CONSORT statement. *Mult Scler Relat Disord* [Internet]. 2016  
23 978 Sep [cited 2017 Feb 24];9:135–9. Available from:  
24  
25 979 <http://linkinghub.elsevier.com/retrieve/pii/S2211034816301225>  
26  
27  
28  
29  
30 980 102. Montori VM, Bhandari M, Devereaux PJ, Manns BJ, Ghali WA, Guyatt GH. In the  
31 981 dark: the reporting of blinding status in randomized controlled trials. *J Clin*  
32 982 *Epidemiol* [Internet]. 2002 Aug [cited 2017 Nov 9];55(8):787–90. Available from:  
33  
34 983 <http://www.ncbi.nlm.nih.gov/pubmed/12384193>  
35  
36  
37  
38 984 103. Bigna JJR, Um LN, Nansseu JRN, J.J.R. B, L.N. U, J.R.N. N. A comparison of quality  
39 985 of abstracts of systematic reviews including meta-analysis of randomized  
40 986 controlled trials in high-impact general medicine journals before and after the  
41 987 publication of PRISMA extension for abstracts: A systematic review and m. *Syst*  
42 988 *Rev* [Internet]. 2016 Oct 13 [cited 2017 Jun 26];5(1):174. Available from:  
43  
44 989 <http://www.embase.com/search/results?subaction=viewrecord&from=export&i>  
45  
46 990 [d=L612833923](http://www.embase.com/search/results?subaction=viewrecord&from=export&i)  
47  
48  
49  
50  
51  
52 991 104. Sarkis-Onofre R, Poletto-Neto V, Cenci MS, Pereira-Cenci T, Moher D. Impact of  
53 992 the CONSORT Statement endorsement in the completeness of reporting of  
54 993 randomized clinical trials in restorative dentistry. *J Dent* [Internet]. 2017 Mar 31  
55 994 [cited 2017 Feb 24];58:54–9. Available from:  
56  
57 995 <http://linkinghub.elsevier.com/retrieve/pii/S0300571217300283>  
58  
59  
60

- 1  
2  
3 996 105. Tharyan P, Premkumar TS, Mathew V, Barnabas JP, Manuelraj. Editorial policy  
4 and the reporting of randomized controlled trials: a survey of instructions for  
5 997 authors and assessment of trial reports in Indian medical journals (2004-05).  
6 998 Natl Med J India [Internet]. [cited 2017 Nov 9];21(2):62–8. Available from:  
7 999 <http://www.ncbi.nlm.nih.gov/pubmed/18807310>  
8  
9 1000  
10  
11  
12  
13 1001 106. Lai TYY, Wong VWY, Lam RF, Cheng ACO, Lam DSC, Leung GM. Quality of  
14 reporting of key methodological items of randomized controlled trials in clinical  
15 1002 ophthalmic journals. *Ophthalmic Epidemiol* [Internet]. 14(6):390–8. Available  
16 1003 from: <http://www.ncbi.nlm.nih.gov/pubmed/18161613>  
17  
18 1004  
19  
20  
21 1005 107. Cobo E, Selva-O’Callaghan A, Ribera JM, Cardellach F, Dominguez R, Vilardell M.  
22 Statistical reviewers improve reporting in biomedical articles: A randomized  
23 1006 trial. *PLoS One*. 2007;2(3).  
24  
25 1007  
26  
27 1008 108. Implementing Reporting Guidelines: Why and How, for Journal Editors  
29 [Internet]. World Association of Medical Editors. Available from:  
30 1009 [https://wame.blog/2017/09/17/implementing-reporting-guidelines-why-and-](https://wame.blog/2017/09/17/implementing-reporting-guidelines-why-and-how-for-journal-editors/)  
31 1010 [how-for-journal-editors/](https://wame.blog/2017/09/17/implementing-reporting-guidelines-why-and-how-for-journal-editors/)  
32  
33 1011  
34  
35  
36 1012 109. Rupinski M, Zagorowicz E, Regula J, Fijuth J, Kraszewska E, Polkowski M, et al.  
37 Randomized Comparison of Three Palliative Regimens Including Brachytherapy,  
38 1013 Photodynamic Therapy and APC in Patients With Malignant Dysphagia  
39 1014 (CONSORT 1a) (Revised II). *Am J Gastroenterol* [Internet]. 2011 Sep 14 [cited  
40 1015 2018 Mar 4];106(9):1612–20. Available from:  
41 1016 <http://www.nature.com/articles/ajg2011178>  
42  
43 1017  
44  
45  
46 1018 110. Jilka RL. The Road to Reproducibility in Animal Research. *J Bone Miner Res*  
47 [Internet]. 2016 Jul [cited 2017 Jul 21];31(7):1317–9. Available from:  
48 1019 <http://doi.wiley.com/10.1002/jbmr.2881>  
49  
50 1020  
51  
52  
53 1021 111. Moher D, Altman DG, Roberts I, Dirnagl U, Chalmers I, Berlin J. Four Proposals to  
54 Help Improve the Medical Research Literature. *PLOS Med* [Internet]. 2015 Sep  
55 1022 22 [cited 2017 Aug 29];12(9):e1001864. Available from:  
56 1023  
57  
58  
59  
60

- 1  
2  
3 1024 <http://dx.plos.org/10.1371/journal.pmed.1001864>  
4  
5  
6 1025 112. Pandis N, Turpin DL, N. P, D.L. T, Pandis N, Turpin DL. Enhancing CONSORT  
7  
8 1026 compliance for improved reporting of randomized controlled trials. *Am J Orthod*  
9  
10 1027 *Dentofac Orthop* [Internet]. 2014 Jan [cited 2017 Jul 21];145(1):1. Available  
11  
12 1028 from:  
13  
14 1029 <http://www.embase.com/search/results?subaction=viewrecord&from=export&i>  
15  
16 1030 [d=L372038916](http://www.embase.com/search/results?subaction=viewrecord&from=export&i)  
17  
18 1031 113. Hill CL, LaValley MP, Felson DT. Secular changes in the quality of published  
19  
20 1032 randomized clinical trials in rheumatology. *Arthritis Rheum* [Internet]. 2002 Mar  
21  
22 1033 [cited 2017 Nov 9];46(3):779–84. Available from:  
23  
24 1034 <http://doi.wiley.com/10.1002/art.512>  
25  
26 1035 114. Hutton B, Salanti G, Caldwell DM, Chaimani A, Schmid CH, Cameron C, et al. The  
27  
28 1036 PRISMA extension statement for reporting of systematic reviews incorporating  
29  
30 1037 network meta-analyses of health care interventions: checklist and explanations.  
31  
32 1038 *Ann Intern Med* [Internet]. 2015 Jun 2 [cited 2017 Jun 26];162(11):777–84.  
33  
34 1039 Available from: <http://annals.org/article.aspx?doi=10.7326/M14-2385>  
35  
36 1040 115. Hirst A, Altman DG. Are peer reviewers encouraged to use reporting guidelines?  
37  
38 1041 A survey of 116 health research journals. Cameron DW, editor. *PLoS One*  
39  
40 1042 [Internet]. 2012 Apr 27 [cited 2017 Jun 7];7(4):e35621. Available from:  
41  
42 1043 <http://dx.plos.org/10.1371/journal.pone.0035621>  
43  
44  
45 1044 116. ClinicalTrials.gov. National Library of Medicine (US). Available from:  
46  
47 1045 <https://clinicaltrials.gov/>  
48  
49 1046 117. Pandis N, Shamseer L, Kokich VG, Fleming PS, Moher D, N. P, et al. Active  
50  
51 1047 implementation strategy of CONSORT adherence by a dental specialty journal  
52  
53 1048 improved randomized clinical trial reporting. *J Clin Epidemiol* [Internet]. 2014  
54  
55 1049 Sep [cited 2017 Jan 15];67(9):1044–8. Available from:  
56  
57 1050 <http://linkinghub.elsevier.com/retrieve/pii/S0895435614001140>  
58  
59 1051 118. Cobo E, Cortes J, Ribera JM, Cardellach F, Selva-O’Callaghan A, Kostov B, et al.  
60

- 1  
2  
3 1052 Effect of using reporting guidelines during peer review on quality of final  
4  
5 1053 manuscripts submitted to a biomedical journal: masked randomised trial. 2011  
6  
7 1054 Nov;343(nov22 2). Available from:  
8  
9 1055 <http://www.ncbi.nlm.nih.gov/pubmed/22108262>  
10  
11 1056 119. Hopewell S, Boutron I, Altman DG, Barbour G, Moher D, Montori V, et al. Impact  
12  
13 1057 of a web-based tool (WebCONSORT) to improve the reporting of randomised  
14  
15 1058 trials: results of a randomised controlled trial. BMC Med [Internet]. 2016 Nov 28  
16  
17 1059 [cited 2017 Feb 24];14(1):199. Available from:  
18  
19 1060 <http://www.ncbi.nlm.nih.gov/pubmed/27894295>  
20  
21 1061 120. Hopewell S, Collins GS, Boutron I, Yu L-M, Cook J, Shanyinde M, et al. Impact of  
22  
23 1062 peer review on reports of randomised trials published in open peer review  
24  
25 1063 journals: retrospective before and after study. BMJ [Internet]. 2014 [cited 2017  
26  
27 1064 Jun 7];349. Available from: <http://www.bmj.com/content/349/bmj.g4145>  
28  
29  
30 1065 121. A peerless review? Automating methodological and statistical review. Available  
31  
32 1066 from: [https://blogs.biomedcentral.com/bmcblog/2016/05/23/peerless-review-](https://blogs.biomedcentral.com/bmcblog/2016/05/23/peerless-review-automating-methodological-statistical-review/)  
33  
34 1067 [automating-methodological-statistical-review/](https://blogs.biomedcentral.com/bmcblog/2016/05/23/peerless-review-automating-methodological-statistical-review/)  
35  
36 1068 122. Mbuagbaw L, Thabane M, Vanniyasingam T, Borg Debono V, Kosa S, Zhang S, et  
37  
38 1069 al. Improvement in the quality of abstracts in major clinical journals since  
39  
40 1070 CONSORT extension for abstracts: a systematic review. Contemp Clin Trials  
41  
42 1071 [Internet]. 2014 Jul [cited 2017 Feb 24];38(2):245–50. Available from:  
43  
44 1072 <http://linkinghub.elsevier.com/retrieve/pii/S1551714414000809>  
45  
46 1073 123. Schriger DL, Altman DG. Inadequate post-publication review of medical  
47  
48 1074 research. BMJ [Internet]. 2010 Aug 11 [cited 2018 Mar 4];341:c3803. Available  
49  
50 1075 from: <http://www.ncbi.nlm.nih.gov/pubmed/20702543>  
51  
52  
53 1076 124. Statreviewer. Available from: <http://www.statreviewer.com/>  
54  
55  
56 1077 125. Tools and templates for implementing reporting guidelines. Available from:  
57  
58 1078 [http://www.equator-network.org/toolkits/using-guidelines-in-journals/tools-](http://www.equator-network.org/toolkits/using-guidelines-in-journals/tools-and-templates-for-implementing-reporting-guidelines/)  
59  
60 1079 [and-templates-for-implementing-reporting-guidelines/](http://www.equator-network.org/toolkits/using-guidelines-in-journals/tools-and-templates-for-implementing-reporting-guidelines/)

- 1  
2  
3 1080 126. PubPeer. Available from: <https://pubpeer.com/>  
4  
5  
6 1081 127. ScienceOpen. Available from: <https://www.scienceopen.com/>  
7  
8  
9 1082 128. Péron J, You B, Gan HK, Maillet D, Chen EX, Pond GR, et al. Influence of  
10  
11 1083 statistician involvement on reporting of randomized clinical trials in medical  
12  
13 1084 oncology. *Anticancer Drugs* [Internet]. 2013 Mar [cited 2017 Feb 24];24(3):306–  
14  
15 1085 9. Available from:  
16 1086 [http://content.wkhealth.com/linkback/openurl?sid=WKPTLP:landingpage&an=0](http://content.wkhealth.com/linkback/openurl?sid=WKPTLP:landingpage&an=0001813-201303000-00010)  
17  
18 1087 [0001813-201303000-00010](http://content.wkhealth.com/linkback/openurl?sid=WKPTLP:landingpage&an=0001813-201303000-00010)  
19  
20  
21 1088 129. Pandis N, Polychronopoulou A, Eliades T. An assessment of quality  
22  
23 1089 characteristics of randomised control trials published in dental journals. *J Dent*  
24  
25 1090 [Internet]. 2010 Sep [cited 2017 Feb 24];38(9):713–21. Available from:  
26  
27 1091 <http://linkinghub.elsevier.com/retrieve/pii/S0300571210001235>  
28  
29 1092 130. Kloukos D, Papageorgiou SN, Doulis I, Petridis H, Pandis N. Reporting quality of  
30  
31 1093 randomised controlled trials published in prosthodontic and implantology  
32  
33 1094 journals. *J Oral Rehabil* [Internet]. 2015 Dec [cited 2017 Feb 24];42(12):914–25.  
34  
35 1095 Available from: <http://doi.wiley.com/10.1111/joor.12325>  
36  
37 1096 131. Blanco D, Biggane AM, Cobo E. Are CONSORT checklists submitted by authors  
38  
39 1097 adequately reflecting what information is actually reported in published papers?  
40  
41 1098 *Trials* [Internet]. 2018 Dec 29 [cited 2018 Jan 31];19(1):80. Available from:  
42  
43 1099 <https://trialsjournal.biomedcentral.com/articles/10.1186/s13063-018-2475-0>  
44  
45  
46 1100 132. Koletsi D, Fleming PS, Behrents RG, Lynch CD, Pandis N. The use of tailored  
47  
48 1101 subheadings was successful in enhancing compliance with CONSORT in a dental  
49  
50 1102 journal. *J Dent* [Internet]. 2017 Dec [cited 2018 Mar 23];67:66–71. Available  
51  
52 1103 from: <http://www.ncbi.nlm.nih.gov/pubmed/28941813>  
53  
54 1104 133. Cobo E, González JA. Taking advantage of unexpected WebCONSORT results.  
55  
56 1105 *BMC Med* [Internet]. 2016 Dec 5 [cited 2018 Feb 16];14(1):204. Available from:  
57  
58 1106 <http://bmcmecicine.biomedcentral.com/articles/10.1186/s12916-016-0758-4>  
59  
60



1107 134. Tijdink JK, Schipper K, Bouter LM, Maclaine Pont P, de Jonge J, Smulders YM.

| Group                                | Intervention                                                                  | Rationale                                                                                       |
|--------------------------------------|-------------------------------------------------------------------------------|-------------------------------------------------------------------------------------------------|
| Training on the practical use of RGs | Introduction of RGs & journalology into graduate curricula (18-22)            | To introduce good research reporting habits early in young researchers' scientific careers.     |
|                                      | Student's development of protocols for coursework and research using RGs (21) |                                                                                                 |
|                                      | Funder's support of author training on RGs (23)                               | Authors, editors, and peer reviewers have insufficient training in issues related to reporting. |
|                                      | Training for peer reviewers and editors                                       |                                                                                                 |

1108 How do scientists perceive the current publication culture? A qualitative focus  
 1109 group interview study among Dutch biomedical researchers. *BMJ Open*  
 1110 [Internet]. 2016 Feb 17 [cited 2017 Sep 28];6(2):e008681. Available from:  
 1111 <http://bmjopen.bmj.com/lookup/doi/10.1136/bmjopen-2015-008681>

1112

## 1113 **Figures, tables and supplementary files**

1114 **Figure 1:** PRISMA flow diagram.

1115 **Figure 2:** Typology of interventions to improve adherence to RGs according to type of  
 1116 intervention and research stage. **Legend:** Evaluated interventions are shown in bold.

1117 **Figure 3:** Gaps in research on the evaluation of interventions to improve adherence to reporting  
 1118 guidelines. **Legend:** Each circle represents one intervention. Variables displayed: 1) Circle size:  
 1119 Number of studies evaluating each intervention (bigger = more studies); 2) Circle colour: Study  
 1120 design of those studies (blue for RCTs and green for observational studies) and 3) Circle fill: Kind  
 1121 of RG implementation (plain for checklist and stripes for bullet points and examples). Research  
 1122 gaps are highlighted in red.

1123 **Supplementary file 1:** Description of the acronyms and full names of all reporting guidelines  
 1124 considered.

1125 **Supplementary file 2:** implementation details of the evaluated interventions.

1126 **Table 1:** Rationale of the interventions identified.

|                                                                                                                                         |                                                                                                                                                                                                                         |                                                                                                                                                                                 |
|-----------------------------------------------------------------------------------------------------------------------------------------|-------------------------------------------------------------------------------------------------------------------------------------------------------------------------------------------------------------------------|---------------------------------------------------------------------------------------------------------------------------------------------------------------------------------|
|                                                                                                                                         | on RGs by journals (22,23)                                                                                                                                                                                              |                                                                                                                                                                                 |
| <b>Enhancing accessibility and understanding</b>                                                                                        | Dissemination of RGs by scientific associations (24)                                                                                                                                                                    | A large number of researchers are not aware of the existence of RGs.                                                                                                            |
|                                                                                                                                         | Translation of RGs to further languages (25)                                                                                                                                                                            | Language barriers may affect the proper use of RGs.                                                                                                                             |
|                                                                                                                                         | Development of expanded database of examples for each RG (26)                                                                                                                                                           | Authors need more examples of good reporting to properly understand certain items.                                                                                              |
| <b>Encouraging adherence</b>                                                                                                            | Author use of RGs as a template for grant application proposals (21)                                                                                                                                                    | Using RGs in early stages may facilitate completeness of reporting of published research.                                                                                       |
|                                                                                                                                         | Required checklist for ethics approval application (11)                                                                                                                                                                 |                                                                                                                                                                                 |
|                                                                                                                                         | Funder's requirement of checklists in author's report (21,108)                                                                                                                                                          |                                                                                                                                                                                 |
|                                                                                                                                         | Author use of the writing aid tool COBWEB (12)                                                                                                                                                                          | A) Authors need help to successfully adhere to RGs at the writing stage and B) Dividing RG items into bullet points and providing examples might help.                          |
|                                                                                                                                         | Author use of a structured approach for reporting research (47,112)                                                                                                                                                     | A) To help authors avoid omissions, B) to aid reviewers and editors in appraising articles and C) to allow more efficient data extraction during the systematic review process. |
|                                                                                                                                         | Author markup of the manuscript to indicate where each RG item is addressed (109)                                                                                                                                       |                                                                                                                                                                                 |
|                                                                                                                                         | Editorial statement endorsing certain RGs (27-46,48-106,113)                                                                                                                                                            | Authors read editorial statements and follow "Instructions to authors".                                                                                                         |
|                                                                                                                                         | Recommendation or requirement to follow RGs in the "Instructions to authors" (27-46,48-106,113)                                                                                                                         |                                                                                                                                                                                 |
| Requirement to submit a RG checklist together with the manuscript indicating page numbers corresponding to each item (27-46,48-106,113) | Authors may not consider editorial statements or recommendations in "Instructions to authors" to be important. Compulsory submission of checklists or text mark-up may encourage authors to be more compliant with RGs. |                                                                                                                                                                                 |
| Requirement to populate and submit a RG checklist with text from the manuscript (114)                                                   |                                                                                                                                                                                                                         |                                                                                                                                                                                 |

|                                                  |                                                                                        |                                                                                                                                                            |
|--------------------------------------------------|----------------------------------------------------------------------------------------|------------------------------------------------------------------------------------------------------------------------------------------------------------|
|                                                  | Journal development of core versions of RGs containing key items (110)                 | Focusing on the most important items could be more effective than considering the whole checklist.                                                         |
|                                                  | Guidance to authors on manuscript preparation by publication officers (111)            | Trained journal officers may enhance authors' compliance with RGs during manuscript preparation.                                                           |
|                                                  | Suggestion for peer reviewers to use RGs (107)                                         | Peer reviewers often do not detect reporting flaws. Therefore, they may need to follow a more systematic approach and use RGs.                             |
|                                                  | Editor's questions to peer reviewers about whether the authors have followed RGs (115) |                                                                                                                                                            |
| <b>Checking adherence and providing feedback</b> | Completeness of reporting check by editors (117)                                       | Requiring checklists at submission does not guarantee adherence. Editors and peer reviewers have to check whether submitted papers are compliant with RGs. |
|                                                  | Peer review against RGs (118)                                                          |                                                                                                                                                            |
|                                                  | Internal peer review against RGs by a trained editorial assistant (120)                | It is extremely unlikely that the average clinical peer reviewer has the methodological expertise to check a paper against RGs.                            |
|                                                  | Implementation of the automatic tool Statreviewer (121)                                |                                                                                                                                                            |
|                                                  | Email to authors to revise the manuscript according to RGs (13)                        | It might be more effective to ask authors for adherence to RGs during the revision process because they will do anything to get their paper published.     |
|                                                  | Implementation of the tool WebCONSORT (119)                                            |                                                                                                                                                            |
|                                                  | Completeness of reporting check at copy-editing (122)                                  | Copy-editing and post-publication offer alternate time points to improve adherence to RGs.                                                                 |
|                                                  | Post- publication peer review (123)                                                    |                                                                                                                                                            |
| <b>Involvement of experts</b>                    | Statistician involvement (78,128-130)                                                  | Professionals with specific knowledge of RGs might help authors when designing, conducting or reporting their research.                                    |
|                                                  | Medical writer involvement (108)                                                       |                                                                                                                                                            |

1127

1  
2  
3  
4  
5  
6  
7  
8  
9  
10  
11  
12  
13  
14  
15  
16  
17  
18  
19  
20  
21  
22  
23  
24  
25  
26  
27  
28  
29  
30  
31  
32  
33  
34  
35  
36  
37  
38  
39  
40  
41  
42  
43  
44  
45  
46  
47  
48  
49  
50  
51  
52  
53  
54  
55  
56  
57  
58  
59  
60

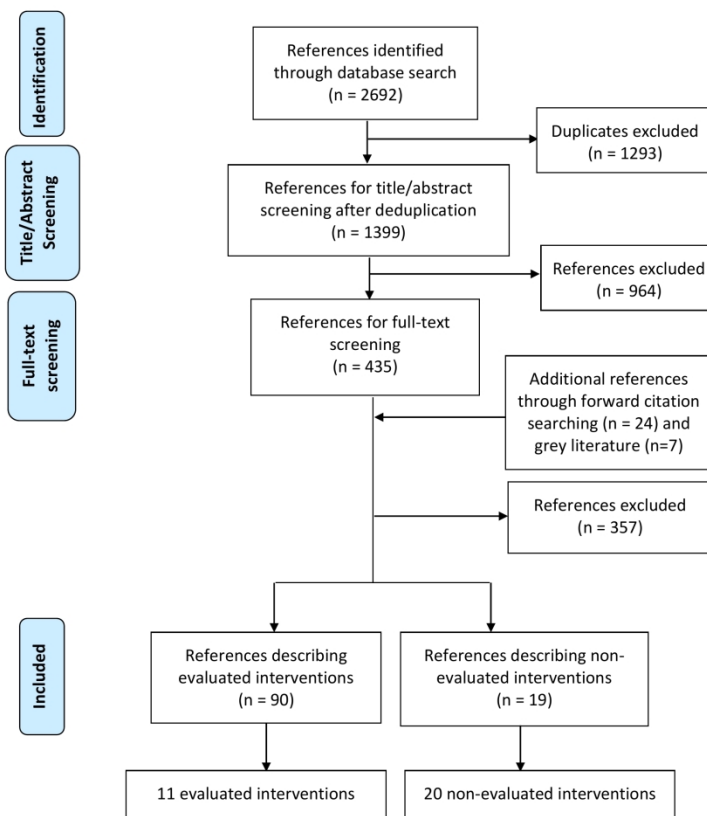

215x279mm (300 x 300 DPI)

1  
2  
3  
4  
5  
6  
7  
8  
9  
10  
11  
12  
13  
14  
15  
16  
17  
18  
19  
20  
21  
22  
23  
24  
25  
26  
27  
28  
29  
30  
31  
32  
33  
34  
35  
36  
37  
38  
39  
40  
41  
42  
43  
44  
45  
46  
47  
48  
49  
50  
51  
52  
53  
54  
55  
56  
57  
58  
59  
60

|                                                 |                                                                                                                |                                                         |                                                 |                                                                                   |                                                                                        |                                                                                                 |                                                                                                                                         |                                                                        |
|-------------------------------------------------|----------------------------------------------------------------------------------------------------------------|---------------------------------------------------------|-------------------------------------------------|-----------------------------------------------------------------------------------|----------------------------------------------------------------------------------------|-------------------------------------------------------------------------------------------------|-----------------------------------------------------------------------------------------------------------------------------------------|------------------------------------------------------------------------|
| TRAINING on the practical use of RGs            | Introduction of RGs & journalology into graduate curricula (18-22)                                             |                                                         | Funder's support of author training on RGs (23) |                                                                                   |                                                                                        | Training for peer reviewers and editors on RGs by journals (22,23)                              |                                                                                                                                         |                                                                        |
|                                                 | Student's development of research protocols using RGs (21)                                                     |                                                         |                                                 |                                                                                   |                                                                                        |                                                                                                 |                                                                                                                                         |                                                                        |
| Enhancing ACCESSIBILITY and UNDERSTANDING       | Dissemination of RGs by scientific associations (24)                                                           |                                                         |                                                 |                                                                                   |                                                                                        |                                                                                                 |                                                                                                                                         |                                                                        |
|                                                 | Translation of RGs to further languages (25)<br>Development of expanded databases of examples for each RG (26) |                                                         |                                                 |                                                                                   |                                                                                        |                                                                                                 |                                                                                                                                         |                                                                        |
| ENCOURAGING adherence                           | Author use of RGs as a template for grant applications' proposals (21)                                         | Required checklist for ethics approval application (11) | Author use of the writing aid tool COBWEB (12)  | Editorial statement endorsing certain RGs (27-46,48-106,113)                      | Suggestion for peer reviewers to use RGs (107)                                         | Recommendation or requirement to follow RGs in the "instructions to authors" (27-46,48-106,113) | Requirement to submit a RG checklist together with the manuscript indicating page numbers corresponding to each item (27-46,48-106,113) | Journal development of core versions of RGs containing key items (110) |
|                                                 |                                                                                                                |                                                         |                                                 | Author use of a structured approach for reporting research (17,112)               |                                                                                        |                                                                                                 |                                                                                                                                         |                                                                        |
|                                                 |                                                                                                                |                                                         |                                                 | Author markup of the manuscript to indicate where each RG item is addressed (109) |                                                                                        |                                                                                                 |                                                                                                                                         |                                                                        |
|                                                 |                                                                                                                |                                                         |                                                 | Funder's requirement of checklists in author's report (21,108)                    |                                                                                        |                                                                                                 |                                                                                                                                         |                                                                        |
| CHECKING adherence and providing FEEDBACK       |                                                                                                                |                                                         |                                                 | Journal development of core versions of RGs containing key items (110)            | Editor's questions to peer reviewers about whether the authors have followed RGs (115) | Guidance to authors on manuscript preparation by publication officers (111)                     | Requirement to populate and submit a RG checklist with text from the manuscript (114)                                                   | Completeness of reporting check by editors (117)                       |
|                                                 |                                                                                                                |                                                         |                                                 | Peer review against RGs (118)                                                     |                                                                                        |                                                                                                 |                                                                                                                                         |                                                                        |
|                                                 |                                                                                                                |                                                         |                                                 | Internal peer review against RGs by a trained editorial assistant (120)           |                                                                                        |                                                                                                 |                                                                                                                                         |                                                                        |
|                                                 |                                                                                                                |                                                         |                                                 | Implementation of the automatic tool StatReviewer (121)                           |                                                                                        |                                                                                                 |                                                                                                                                         |                                                                        |
|                                                 |                                                                                                                |                                                         |                                                 | Email to authors to revise the manuscript according to RGs (113)                  |                                                                                        |                                                                                                 |                                                                                                                                         |                                                                        |
| Implementation of the web tool WebCONSORT (119) |                                                                                                                |                                                         |                                                 |                                                                                   |                                                                                        |                                                                                                 |                                                                                                                                         |                                                                        |
| Involvement of EXPERTS                          |                                                                                                                |                                                         |                                                 | Medical writer involvement (108)                                                  |                                                                                        |                                                                                                 |                                                                                                                                         | Completeness of reporting check at copy-editing (122)                  |
|                                                 |                                                                                                                |                                                         |                                                 | Statistician involvement (78,128-130)                                             |                                                                                        |                                                                                                 |                                                                                                                                         |                                                                        |
|                                                 | EDUCATION                                                                                                      | GRANT WRITING                                           | PROTOCOL WRITING                                | MANUSCRIPT WRITING                                                                | MANUSCRIPT SUBMISSION                                                                  | JOURNAL PEER REVIEW                                                                             | COPY-EDITING                                                                                                                            | POST-PUBLICATION                                                       |
|                                                 |                                                                                                                | BEFORE STUDY CONDUCT                                    |                                                 |                                                                                   | AFTER STUDY CONDUCT                                                                    |                                                                                                 |                                                                                                                                         |                                                                        |
|                                                 | RESEARCH STAGE                                                                                                 |                                                         |                                                 |                                                                                   |                                                                                        |                                                                                                 |                                                                                                                                         |                                                                        |

Typology of interventions to improve adherence to RGs according to type of intervention and research stage.  
Legend: Evaluated interventions are shown in bold.

670x379mm (300 x 300 DPI)

1  
2  
3  
4  
5  
6  
7  
8  
9  
10  
11  
12  
13  
14  
15  
16  
17  
18  
19  
20  
21  
22  
23  
24  
25  
26  
27  
28  
29  
30  
31  
32  
33  
34  
35  
36  
37  
38  
39  
40  
41  
42  
43  
44  
45  
46  
47  
48  
49  
50  
51  
52  
53  
54  
55  
56  
57  
58  
59  
60

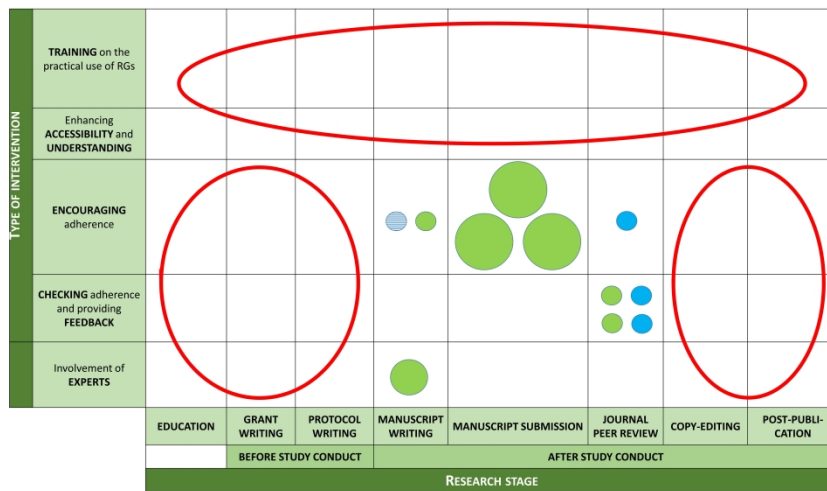

Gaps in research on the evaluation of interventions to improve adherence to reporting guidelines. Legend: Each circle represents one intervention. Variables displayed: 1) Circle size: Number of studies evaluating each intervention (bigger = more studies); 2) Circle colour: Study design of those studies (blue for RCTs and green for observational studies) and 3) Circle fill: Kind of RG implementation (plain for checklist and stripes for bullet points and examples). Research gaps are highlighted in red.

670x379mm (300 x 300 DPI)

| Acronym  | Full name                                                                                       |
|----------|-------------------------------------------------------------------------------------------------|
| CONSORT  | Consolidated Standards of Reporting Trials                                                      |
| STROBE   | Strengthening the Reporting of Observational Studies in Epidemiology                            |
| PRISMA   | Preferred Reporting Items for Systematic Reviews and Meta-Analyses                              |
| SRQR     | Standards for Reporting Qualitative Research                                                    |
| COREQ    | Consolidated criteria for Reporting Qualitative research                                        |
| STARD    | Standard Protocol Items: Recommendations for Interventional Trials                              |
| TRIPOD   | Transparent Reporting of a multivariable prediction model for Individual Prognosis or Diagnosis |
| SQUIRE   | Standards for Quality Improvement Reporting Excellence                                          |
| CHEERS   | Consolidated Health Economic Evaluation Reporting Standards                                     |
| SPIRIT   | Standard Protocol Items: Recommendations for Interventional Trials                              |
| PRISMA-P | Preferred Reporting Items for Systematic Review and Meta-Analysis Protocols                     |
| CARE     | Case Report                                                                                     |
| AGREE    | Appraisal of Guidelines, Research and Evaluation                                                |
| ARRIVE   | Animal Research: Reporting In Vivo Experiments                                                  |
| RIGHT    | Reporting Tool for Practice Guidelines in Health Care                                           |
| QUOROM   | Quality of Reporting of Meta-analyses                                                           |

| Type of intervention  | Intervention                                                                                | Number of studies and study design                                                                                                                                                                               | Details of the intervention                                                                                                                                                                                                                                       | RGs implemented                                                                                                                                                                                                                | Format of RG implementation          | Measure of adherence to RGs                                                                                                   | Effect on adherence to RGs*                                                                                                                                                                            |
|-----------------------|---------------------------------------------------------------------------------------------|------------------------------------------------------------------------------------------------------------------------------------------------------------------------------------------------------------------|-------------------------------------------------------------------------------------------------------------------------------------------------------------------------------------------------------------------------------------------------------------------|--------------------------------------------------------------------------------------------------------------------------------------------------------------------------------------------------------------------------------|--------------------------------------|-------------------------------------------------------------------------------------------------------------------------------|--------------------------------------------------------------------------------------------------------------------------------------------------------------------------------------------------------|
| Encouraging adherence | Implementation of the writing aid tool COBWEB (12)                                          | 1 RCT                                                                                                                                                                                                            | Participants have to write the six domains of the methods section of the manuscript for the protocol they receive. They have access to COBWEB tool for a random three of the six domains.                                                                         | CONSORT & CONSORT extension for non-pharmacological interventions                                                                                                                                                              | Bullet points and examples (6 items) | Mean score for completeness of reporting (scale 0–10, items weighted)                                                         | Difference of 2.1 (95% CI 1.5-2.7)                                                                                                                                                                     |
|                       | Author use of a structured approach for reporting research (47)                             | 1 Observational study (cross-sectional evaluation)                                                                                                                                                               | Results are posted in a standard tabular format without discussions or conclusions.                                                                                                                                                                               | CONSORT                                                                                                                                                                                                                        | Checklist (4 items)                  | Percentage compliance of each RG item                                                                                         | Difference of 0.16, 0.10, 0.18 and 0.36 for each of the 4 items considered                                                                                                                             |
|                       | Journal endorsement (3 interventions, see "Details of the intervention") (27–46,48–106,113) | 80 observational studies (57 cross sectional evaluations of endorsing vs non-endorsing journals, 9 before and after evaluations of endorsing journals before and after endorsement, 14 both kind of evaluations) | A) Editorial statement endorsing certain RGs,<br>B) Recommendation or requirement to follow RGs in the "Instructions to authors", and<br>C) Requirement to submit a RG checklist together with the manuscript indicating page numbers corresponding to each item. | CONSORT (46 of 80)<br>CONSORT extensions (9 of 80)<br>QUOROM (3 of 80)<br>PRISMA (4 of 80)<br>PRISMA extensions (1 of 80)<br>STARD (11 of 80)<br>STROBE (4 of 80)<br>ARRIVE (1 of 80)<br>CONSORT, STROBE and PRISMA (11 of 80) | Checklist (all items)                | For CONSORT: percentage of compliance for each item**<br><br>For other RGs: Mean summed score for completeness of reporting** | For CONSORT: 25 items improved (see details for each item on figure 2 on Turner et al. (6))<br><br>For CONSORT extension for harms: Difference of 0.04 (99% CI –1.50 to 1.58) (see Stevens et al. (3)) |



1  
2  
3  
4  
5  
6  
7  
8  
9  
10  
11  
12  
13  
14  
15  
16  
17  
18  
19  
20  
21  
22  
23  
24  
25  
26  
27  
28  
29  
30  
31  
32  
33  
34  
35  
36  
37  
38  
39  
40  
41  
42  
43  
44  
45  
46

|                                                |       |                                                                                                                                                                                                            |                        |                       |                                                                             |                                                                                                                                                                                                                                                                                                                                                                                            |
|------------------------------------------------|-------|------------------------------------------------------------------------------------------------------------------------------------------------------------------------------------------------------------|------------------------|-----------------------|-----------------------------------------------------------------------------|--------------------------------------------------------------------------------------------------------------------------------------------------------------------------------------------------------------------------------------------------------------------------------------------------------------------------------------------------------------------------------------------|
|                                                |       |                                                                                                                                                                                                            |                        |                       |                                                                             | <p>For PRISMA:<br/>Difference of 0.53<br/>(99% CI 0.02 to 1.03)<br/>(see Stevens et al. (3))</p> <p>For STARD:<br/>Difference of 0.52<br/>(99% CI -0.11 to 1.16) (see Stevens et al. (3))</p> <p>For STRICTA:<br/>Difference of 1.42<br/>(99% CI -0.04 to 2.88) (see Stevens et al. (3))</p> <p>For STROBE:<br/>Difference of 1.55<br/>(99% CI -3.19 to 6.29) (see Stevens et al. (3))</p> |
| Suggestion for peer reviewers to use RGs (107) | 1 RCT | Peer reviewers are sent a standard letter encouraging them to use different reporting guidelines. Reviewers are not asked to report whether they used the reporting guideline in reviewing the manuscript. | CONSORT, QUOROM, STARD | Checklist (all items) | Modified version of Manuscript Quality Assessment Instrument (scale 36-180) | Difference of 0.9 (95% CI -0.3 to +2.1)                                                                                                                                                                                                                                                                                                                                                    |

|                                           |                                                                                                  |                                                            |                                                                                                                                                                                                                                                                                                                                                            |                                 |                           |                                                                             |                                                                                                                 |
|-------------------------------------------|--------------------------------------------------------------------------------------------------|------------------------------------------------------------|------------------------------------------------------------------------------------------------------------------------------------------------------------------------------------------------------------------------------------------------------------------------------------------------------------------------------------------------------------|---------------------------------|---------------------------|-----------------------------------------------------------------------------|-----------------------------------------------------------------------------------------------------------------|
|                                           | Completeness of reporting check by the editors (117)                                             | 1 Observational Study (Before and after evaluation)        | Initial submissions are vetted by the editor-in-chief. If the submission is considered appropriate, manuscripts are assessed by the associate editor for CONSORT adherence. Authors are asked to make changes accordingly until associate editor deems appropriate that they move to the next step of the review process leading to an editorial decision. | CONSORT                         | Checklist (all items)     | Percentage of compliance of each RG item                                    | Before – compliance ranges from 0% to 100% (Median 40%)<br><br>After – perfect compliance in 33 out of 37 items |
| Checking adherence and providing feedback | Additional review against RGs (118)                                                              | 1 RCT                                                      | A senior statistician does an additional review of all papers and provides authors suggestions on how to follow reporting guideline checklists.                                                                                                                                                                                                            | STROBE, CONSORT, STARD          | Checklist (all items)     | Modified version of Manuscript Quality Assessment Instrument (scale 1 to 9) | Difference of 0.25 (95% CI -0.05 to +0.54)                                                                      |
|                                           | Active implementation of RG by editors (2 interventions, see “Details of the intervention”) (13) | 1 Observational study (Interrupted time series evaluation) | A) Email is sent to authors to revise the abstract according to the guidelines at the revision stage and B) Changes are made by the assistant editors of these journals towards the end of the editorial process.                                                                                                                                          | CONSORT extension for abstracts | Checklist (9 of 17 items) | Monthly mean number of items reported (scale 0 to 9)                        | Difference of 1.5 items                                                                                         |

|                        |                                                       |                                                       |                                                                                                                                                                                                                |                                   |                            |                                                                           |                                                                                                                                                                                                                                                               |
|------------------------|-------------------------------------------------------|-------------------------------------------------------|----------------------------------------------------------------------------------------------------------------------------------------------------------------------------------------------------------------|-----------------------------------|----------------------------|---------------------------------------------------------------------------|---------------------------------------------------------------------------------------------------------------------------------------------------------------------------------------------------------------------------------------------------------------|
|                        | Implementation of the web-based tool WebCONSORT (119) | 1 RCT                                                 | Journal editor includes a link to WebCONSORT in the revision letter to authors. Authors are directed to an automatically generated list of items and a flow diagram customised to their specific trial design. | CONSORT & some CONSORT extensions | Checklist (10 of 25 items) | Percentage of items reported for each article                             | Difference of 0.04 (95% CI -0.02 to +0.10)                                                                                                                                                                                                                    |
| Involvement of experts | Statistician involvement (78,128-130)                 | 4 Observational studies (cross sectional evaluations) | Statisticians (or epidemiologists or other quantitative methodologists) are involved in the design, conduct or reporting of the study                                                                          | CONSORT                           | Checklist (all items)      | Mean score for completeness of reporting (scale 0-10, items not weighted) | <p>In Diaz-Ordaz (78): No global effect provided (see effects for individual items in Table 2 of the paper)</p> <p>In Pandis et al. (128): Difference of 0.93</p> <p>In Péron et al. (129): No difference in medians</p> <p>In Kloukos et al. (130): 0.27</p> |

\*Difference between adherence to RGs in intervention and non-intervention group. We did not report the CI of the effect size when authors did not report it in the original papers.

\*\*As the 80 individual studies that belong to this category used different measures of adherence to reporting guidelines, we report here the measures used in the two systematic reviews that summarized the pooled results of most of these studies (3,6).



# PRISMA–ScR Checklist\*

| Section/topic             | # | Checklist item                                                                                                                                                                                                                                                            | Reported on page #                                 |
|---------------------------|---|---------------------------------------------------------------------------------------------------------------------------------------------------------------------------------------------------------------------------------------------------------------------------|----------------------------------------------------|
| <b>TITLE</b>              |   |                                                                                                                                                                                                                                                                           |                                                    |
| Title                     | 1 | Identify the report as a scoping review.                                                                                                                                                                                                                                  | 1                                                  |
| <b>ABSTRACT</b>           |   |                                                                                                                                                                                                                                                                           |                                                    |
| Structured summary        | 2 | Provide a structured summary that includes (as applicable) background, objectives, eligibility criteria, sources of evidence, charting methods, results, and conclusions that relate to the review questions and objectives.                                              | 1,2                                                |
| <b>INTRODUCTION</b>       |   |                                                                                                                                                                                                                                                                           |                                                    |
| Rationale                 | 3 | Describe the rationale for the review in the context of what is already known. Explain why the review questions/objectives lend themselves to a scoping review approach.                                                                                                  | 3,4<br>("Background")                              |
| Objectives                | 4 | Provide an explicit statement of the questions and objectives being addressed with reference to their key elements (e.g., population or participants, concepts, and context) or other relevant key elements used to conceptualize the review questions and/or objectives. | 5<br>("Objectives")                                |
| <b>METHODS</b>            |   |                                                                                                                                                                                                                                                                           |                                                    |
| Protocol and registration | 5 | Indicate whether a review protocol exists; state if and where it can be accessed (e.g., a Web address); and if available, provide registration information, including the registration number.                                                                            | 5 ("Methods")                                      |
| Eligibility criteria      | 6 | Specify characteristics of the sources of evidence used as eligibility criteria (e.g., years considered, language, and publication status), and provide a rationale.                                                                                                      | 5,6 ("Eligibility Criteria", "Exclusion Criteria") |
| Information sources       | 7 | Describe all information sources in the search (e.g., databases with dates of coverage and contact with authors to identify additional sources), as well as the date the most recent search was executed.                                                                 | 6 ("Search Strategy and Study Selection")          |
| Search                    | 8 | Present the full electronic search strategy for at least 1 database, including any limits used, such that it could be repeated.                                                                                                                                           | 6 ("Search Strategy and Study Selection")          |
| Study selection           | 9 | State the process for selecting sources of evidence (i.e., screening and eligibility) included in the scoping review.<br>For peer review only - <a href="http://bmjopen.bmj.com/site/about/guidelines.xhtml">http://bmjopen.bmj.com/site/about/guidelines.xhtml</a>       | 6,7 ("Search Strategy and Study Selection")        |

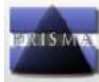

# PRISMA-ScR Checklist\*

1  
2  
3  
4  
5  
6  
7  
8  
9  
10  
11  
12  
13  
14  
15  
16  
17  
18  
19  
20  
21  
22  
23  
24  
25  
26  
27  
28  
29  
30  
31  
32  
33  
34  
35  
36  
37  
38  
39  
40  
41  
42  
43  
44  
45  
46  
47

|                                    |    |                                                                                                                                                                                                                                                                                                            |                       |
|------------------------------------|----|------------------------------------------------------------------------------------------------------------------------------------------------------------------------------------------------------------------------------------------------------------------------------------------------------------|-----------------------|
|                                    |    |                                                                                                                                                                                                                                                                                                            | Selection")           |
| Data collection process            | 10 | Describe the methods of charting data from the included sources of evidence (e.g., calibrated forms or forms that have been tested by the team before their use, and whether data charting was done independently or in duplicate) and any processes for obtaining and confirming data from investigators. | 8 ("Data Extraction") |
| Data items                         | 11 | List and define all variables for which data were sought and any assumptions and simplifications made.                                                                                                                                                                                                     | 8 ("Data Extraction") |
| Risk of bias in individual studies | 12 | If done, provide a rationale for conducting a critical appraisal of included sources of evidence; describe the methods used and how this information was used in any data synthesis (if appropriate).                                                                                                      | N/A                   |
| Summary measures                   | 13 | Not applicable for scoping reviews.                                                                                                                                                                                                                                                                        | N/A                   |
| Synthesis of results               | 14 | Describe the methods of handling and summarizing the data that were charted.                                                                                                                                                                                                                               | 9 ("Data Synthesis)   |

Page 1 of 2

| Section/topic                 | #  | Checklist item 10                                                                                                                                                            | Reported on page # |
|-------------------------------|----|------------------------------------------------------------------------------------------------------------------------------------------------------------------------------|--------------------|
| Risk of bias across studies   | 15 | Not applicable for scoping reviews.                                                                                                                                          | N/A                |
| Additional analyses           | 16 | Not applicable for scoping reviews.                                                                                                                                          | N/A                |
| <b>RESULTS</b>                |    |                                                                                                                                                                              |                    |
| Study selection               | 17 | Give numbers of sources of evidence screened, assessed for eligibility, and included in the review, with reasons for exclusions at each stage, ideally using a flow diagram. | Figure 1           |
| Study characteristics         | 18 | For each source of evidence, present characteristics for which data were charted and provide the citations.                                                                  | 10 ("Results)      |
| Risk of bias within studies   | 19 | If done, present data on critical appraisal of included sources of evidence (see item 12).                                                                                   | N/A                |
| Results of individual studies | 20 | For each included source of evidence, present the relevant data that were charted that relate to the review questions and objectives.                                        | 10 ("Results")     |
| Synthesis of results          | 21 | Summarize and/or present the charting results as they relate to the review questions and objectives.                                                                         | 10-15 ("Results")  |

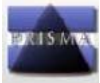

# PRISMA–ScR Checklist\*

1  
2  
3  
4  
5  
6  
7  
8  
9  
10  
11  
12  
13  
14  
15  
16  
17  
18  
19  
20  
21  
22  
23  
24  
25  
26  
27  
28  
29  
30  
31  
32  
33  
34  
35  
36  
37  
38  
39  
40  
41  
42  
43  
44  
45  
46  
47

|                             |    |                                                                                                                                                                                                 |                                  |
|-----------------------------|----|-------------------------------------------------------------------------------------------------------------------------------------------------------------------------------------------------|----------------------------------|
| Risk of bias across studies | 22 | Not applicable for scoping reviews.                                                                                                                                                             |                                  |
| Additional analysis         | 23 | Not applicable for scoping reviews.                                                                                                                                                             |                                  |
| <b>DISCUSSION</b>           |    |                                                                                                                                                                                                 |                                  |
| Summary of evidence         | 24 | Summarize the main results (including an overview of concepts, themes, and types of evidence available), link to the review questions and objectives, and consider the relevance to key groups. | 15<br>("Discussion")             |
| Limitations                 | 25 | Discuss the limitations of the scoping review process.                                                                                                                                          | 17<br>("Discussion")             |
| Conclusions                 | 26 | Provide a general interpretation of the results with respect to the review questions and objectives, as well as potential implications and/or next steps.                                       | 15-17<br>("Discussion")          |
| <b>FUNDING</b>              |    |                                                                                                                                                                                                 |                                  |
| Funding                     | 27 | Describe sources of funding for the included sources of evidence, as well as sources of funding for the scoping review. Describe the role of the funders of the scoping review.                 | 18<br>("Declarations – Funding") |

\*Original source: <http://annals.org/aim/fullarticle/2700389/prisma-extension-scoping-reviews-prisma-scr-checklist-explanation>
