# Supplementary material for: Scoping review on interventions to improve adherence to reporting guidelines in health research
Source: PubMed Central journal article supplement (PMC6527996; doi:10.1136/bmjopen-2018-026589), 2019-05-09
Supplement: bmjopen-2018-026589supp001.pdf [file bmjopen-2018-026589supp001.pdf]

| <b>Acronym</b> | <b>Full name</b>                                                                                |
|----------------|-------------------------------------------------------------------------------------------------|
| CONSORT        | Consolidated Standards of Reporting Trials                                                      |
| STROBE         | Strengthening the Reporting of Observational Studies in Epidemiology                            |
| PRISMA         | Preferred Reporting Items for Systematic Reviews and Meta-Analyses                              |
| SRQR           | Standards for Reporting Qualitative Research                                                    |
| COREQ          | Consolidated criteria for Reporting Qualitative research                                        |
| STARD          | Standard Protocol Items: Recommendations for Interventional Trials                              |
| TRIPOD         | Transparent Reporting of a multivariable prediction model for Individual Prognosis or Diagnosis |
| SQUIRE         | Standards for Quality Improvement Reporting Excellence                                          |
| CHEERS         | Consolidated Health Economic Evaluation Reporting Standards                                     |
| SPIRIT         | Standard Protocol Items: Recommendations for Interventional Trials                              |
| PRISMA-P       | Preferred Reporting Items for Systematic Review and Meta-Analysis Protocols                     |
| CARE           | Case Report                                                                                     |
| AGREE          | Appraisal of Guidelines, Research and Evaluation                                                |
| ARRIVE         | Animal Research: Reporting In Vivo Experiments                                                  |
| RIGHT          | Reporting Tool for Practice Guidelines in Health Care                                           |
| QUOROM         | Quality of Reporting of Meta-analyses                                                           |
